# Supplementary material for: Exploring the antioxidant, antimicrobial, cytotoxic and biothermodynamic properties of novel morpholine derivative bioactive Mn(ii), Co(ii) and Ni(ii) complexes – combined experimental and theoretical measurements towards DNA/BSA/SARS-CoV-2 3CLPro
Source: Royal Society of Chemistry journal article supplement (doi:10.1039/d2md00394e), 2023-01-01
Supplement: d2md00394e1.pdf [file d2md00394e1.pdf]

**Electronic Supplementary Information File**

**Exploring the antioxidant, antimicrobial, cytotoxic and  
biothermodynamic properties of novel morpholine derivative bio-active  
Mn(II), Co(II) and Ni(II) complexes - A combined experimental and  
theoretical measurements towards DNA/BSA/SARS-CoV-2 3CL<sup>pro</sup>**

Karunganathan Sakthikumar <sup>a</sup>, Bienfait Kabuyaya Isamura <sup>a,c</sup> and Rui Werner  
Maçedo Krause <sup>a, b \*</sup>

<sup>a</sup> Department of Chemistry, Center for Chemico- and Biomedical Research (CCBR),  
Faculty of Science, Rhodes University, Grahamstown 6140, Eastern Cape, South Africa

<sup>b</sup> Center for Chemico- and Biomedical Research (CCBR), Faculty of Science, Rhodes  
University, Grahamstown 6140, Eastern Cape, South Africa

<sup>c</sup> Department of Chemistry, The University of Manchester, Manchester M13 9PL, Great  
Britain

\* Correspondence should be addressed to Rui Werner Maçedo Krause: [r.krause@ru.ac.za](mailto:r.krause@ru.ac.za)

\* Corresponding author:

**Prof. Rui WM Krause,**

*Professor, Organic & Medicinal Chemistry,*

*Department of Chemistry, Faculty of Science, Rhodes University, Grahamstown 6140,  
Eastern Cape, South Africa.*

*Email: [r.krause@ru.ac.za](mailto:r.krause@ru.ac.za),*

*Phone: +27 741622674; +27 46 603 7030*

## **2. Experimental section**

### *2.1. Materials and techniques*

All chemicals, reagents, and solvents of analytical-grade were procured from Sigma-Aldrich, BD Biosciences, and Alfa Aesar's repositories. The ligand (**HL**) and its mixed ligand complexes (**1–3**) were examined by a variety of analytical and spectroscopic studies. The full details were summarized in our earlier reports.<sup>21, 13</sup>

### *2.2. Assessment of DNA/BSA binding features*

#### *2.2.1. Assessment of DNA nuclease efficacy*

All substances were examined for DNA cleavage ability and the characteristics were examined for all substances along with DNA by gel electrophoresis approach under H<sub>2</sub>O<sub>2</sub> in Tris-HCl buffer solution with a pH of 7.4.<sup>21, 13</sup> The characteristics were examined of all substances along with DNA containing H<sub>2</sub>O<sub>2</sub> and Tris-HCl buffer solution with a pH of 7.4.<sup>21, 13</sup> The gel layer was removed from the tank solution after the experiment was finished and put in front of a UV transilluminator. Additionally, each band lane was scrutinized with control (DNA+H<sub>2</sub>O<sub>2</sub>).<sup>22, 13</sup>

#### *2.2.2. Analysis of DNA-interaction characteristics*

The DNA-binding experiment was carried out by an electronic absorption spectrophotometer by raising the DNA concentration from zero to 50  $\mu$ M to the given concentration of all samples (50  $\mu$ M) in Tris-HCl buffer (5mM Tris-HCl/50 mM NaCl) with a pH of 7.4 at 25° C. Concentration of DNA was also verified spectrophotometrically with an extinction coefficient of 6,600 M<sup>-1</sup> cm<sup>-1</sup> at 260 nm.<sup>23–26</sup>. Additional information was summarized in our prior report.<sup>13</sup>

#### *2.2.3. Assessment of biothermodynamic characteristics*

The deoxyribonucleic acid thermal denaturation properties were performed by an electronic absorption spectrophotometer connected to a temperature-controlled sample container in both the presence and absence of the substances. In a 5mM Tris-HCl/50mM NaCl buffer solution with a pH of 7.4, CT-DNA was treated with all test substances in a 1:1 ratio (50  $\mu$ M). The experiments were executed by observing the absorption (260 nm) of CT DNA at different temperatures between 25 and 100  $^{\circ}$ C in the absence and presence of the complexes.<sup>27–29, 13</sup>

#### *2.2.4. Assessment of DNA affinity by hydrodynamic technique*

Hydrodynamic properties were performed using an Ostwald viscometer with the help of a thermostat (25  $\pm$  0.1  $^{\circ}$ C). The experiment was performed of all samples, including ethidium bromide at various concentrations (20, 40, 60, 80, 100  $\mu$ M) and each test compound was mixed with the deoxyribonucleic acid solution (100  $\mu$ M) in the Ostwald viscometer. With a help of digital stopwatch, average flow time was gauged three times for each addition, and the specific viscosity of deoxyribonucleic acid was also measured in the presence and absence of test samples.<sup>13, 30</sup>

#### *2.2.5. Assessment of DNA/BSA binding characteristics by a fluorometric technique*

In the emission spectral titration, ethidium bromide (EB) (C<sub>21</sub>H<sub>20</sub>BrN<sub>3</sub>) solution (20  $\mu$ M) in Tris-HCl buffer solution was incubated with the DNA solution (200  $\mu$ M) with saturated binding levels and kept in a dark place for two hours. The titration was performed for all tested compounds (1–200  $\mu$ M) with pre-incubated EB-bound deoxyribonucleic acid and carefully monitored the intensity variations between 510 nm and 610 nm in the presence and absence of deoxyribonucleic acid during the initial emission and excitation of EB.<sup>31</sup> Also, the emission spectral titration for all compounds was also carried out at a fixed concentration (25  $\mu$ M) of BSA with an incremental concentration of substances (0–25  $\mu$ M)

in a Tris-HCl buffer solution with a pH of 7.4 and the binding ability of all samples with BSA was examined at a fixed excitation wavelength of 278 nm and perceived the emission at 350 nm.<sup>32</sup> Concentration of BSA was also confirmed spectrophotometrically with an extinction coefficient of 43,824 M<sup>-1</sup> cm<sup>-1</sup> at 278 nm. Additional data was included in our prior report.<sup>13</sup>

#### *4.2.6. Förster's theory-based FRET computation*

The intersection of the acceptor's (compound) absorption spectrum and the donor's (BSA) emission spectrum describes that the acceptor group may get excited as a result of the excited donor's energy being lost to the ground state. Resonance refers to the phenomenon of matching energy.<sup>33-35</sup> According to Förster's theory, the critical distance between donor and acceptor molecules can be estimated using the FRET approach to assess the binding affinity between BSA-substance systems, and full details of other FRET parameters with their representations was also included in the previous report.<sup>13</sup>

#### *2.2.7. Analysis of DNA binding characteristics using the CV method*

The electrochemical analysis is a critical approach to examining the electron transfer reactions of the test compounds. With a scan rate of 0.1V, the electrochemical analyzer (CHI 620C) was utilized with a three-electrode system consisting of glassy carbon as the working electrode, Ag/AgCl as the reference electrode, and platinum wire as the counter/auxiliary electrode to observe the changes in peak current as well as peak potential under the interaction between test compound and deoxyribonucleic acid. The CV analysis for free substances was performed at 10 μM at 25 °C in a 5mM Tris-HCl buffer solution with a pH of 7.4. While CT-DNA increases (0–10 μM) in each sample solution, shifts in potential, including variations in the anodic and cathodic peak currents, have been monitored and the changes in peak current as well as peak potential further afford data on

the binding constant as well as the mode of interaction for test compound–DNA adducts.<sup>36,13</sup>

#### *2.2.8. Assessment of BSA binding characteristics by electronic absorption titration*

The absorption titrations were done with a 25  $\mu\text{M}$  concentration of BSA at 25°C in a Tris-HCl buffer solution with a pH of 7.4. While the sample concentrations (0–25  $\mu\text{M}$ ) increased in the same BSA concentration solution, the change in the absorption band at 278 nm was continuously measured. The BSA property is further supported by the evaluation of a strong absorption band at 278 nm in the UV region. The increment of the test compound causes a slow rise in the absorption band of the BSA, which leads to the hyperchromism effect with hypsochromic shift, indicating that alterations in conformation happened owing to non-covalent interactions between the test compound and bovine serum albumin.<sup>37, 13</sup>

#### *2.3. DFT and molecular docking simulations*

To validate the results found from the experimental studies, the synthesized compounds were further investigated for their interaction with DNA/BSA/SARS-CoV-2 3CL<sup>pro</sup>. All test compounds were fully optimized with the help of the hybrid B3LYP functional as accomplished in the Gaussian 09 package.<sup>38</sup> To demonstrate the global and local reactivity of all substances, the FMO theory<sup>39</sup> and molecular electrostatic potentials<sup>40</sup> were studied. Using the B3LYP-optimized structures of each substance, docking computations were also carried out. The Autodock Vina software was used for input structure preparation and calculations<sup>41</sup> and the visualization was performed on Discovery Studio.<sup>42</sup>

#### *2.4. UV-Vis absorption titrations for in vitro antioxidant assay*

All samples were evaluated for their scavenging abilities using the UV-Vis absorption titrations at different concentrations of 40, 80, 120, 160, 200, and 240  $\mu\text{M}$ . While performing the antioxidant properties for the DPPH $^{\square}$ , OH $^{\square}$ , SO $_2^{\square-}$ , and NO $^{\square}$  radical scavenging, the absorbance at 517, 230, 590, and 546 nm, respectively, was closely observed. The observed IC $_{50}$  values of all samples were further compared with standard ascorbic acid.<sup>43, 44, 13</sup>

### 2.5. Assessment of in-vitro antimicrobial properties

*In-vitro* antimicrobial properties were evaluated for all samples by the agar disc diffusion method towards some selected fungal and bacterial strains.<sup>45-47</sup> All the microbial strains were grown for 24 h at 37° C with 200 rpm agitation in Mueller Hinton broth (MHB) and they were treated with 20  $\mu\text{L}$  of test substances (100  $\mu\text{M}$ ) and incubated for 48 h for bacteria and 7 days for fungal strains. It was continuously monitored for the diffusion of chemical substances into the agar medium and inhibition of the growth of the microorganism. Also, the diameter of clear zone inhibition was assessed in millimeter with the help of a ruler under the plate's base. Additionally, the observed inhibition zone values were comparatively analyzed with standard antifungal drugs *ketoconazole* and *amphotericin B* as well as the standard antibiotic medications *streptomycin* and *amikacin* and refer to more details from our previous report.<sup>13</sup>

### 2.6. MTT Cell Viability Assay for anticancer characteristics

All substances directed towards the A549, HepG2, MCF-7, and NHDF cell lines were evaluated by the MTT approach. The MTT test is an enzyme-based colorimetric method that is quantitative, sensitive, and consistently supported to examine the viability, cytotoxicity, and proliferation of cells. The cells were then kept in medium consisting of varied doses of the chemical substances, which also treated with tetrazolium dye and The

cells were further incubated for four hours at 37°C. The viable cells consists of NAD(P)H-dependent oxidoreductase enzymes, which converts the water-soluble yellow MTT tetrazolium salt into water-insoluble purple-blue coloured stable formazan crystals. While the cells die, they lose the colour-changing capability. Then, the medium was separated out and blended with DMSO (100 µL). After agitating gradually twice for 5 s, the absorbance of the formazan dye generated by the cells is evaluated in an ELISA plate reader at 570 nm. The collected data (mean O.D. ± S.D) was utilized to compute the IC<sub>50</sub> value compared with the standard cisplatin-anticancer medication<sup>48</sup> and comprehensive details of cell culture and protocols of the MTT assay are given in the previous report.<sup>13</sup>

### *2.7. Determination of Lipophilicity (hydrophobicity)*

The lipophilicity of all complexes and free ligand has evaluated by the flask- shaking method through n-octanol/deionized water phase partition.<sup>49-51</sup> 0.015 M test compound solutions were prepared in an equal volume (1:1 v/v) of n-octanol-deionized water (10 mL) and agitated continuously for 24 h. The organic (n-octanol) and aqueous (deionized water) phases were then cautiously segregated using a separating funnel after reaching the equilibrium condition. Finally, all compounds' concentration in each segregated phase was analysed using an electronic absorption spectrophotometer.<sup>52</sup> The partition coefficient (log P<sub>o/w</sub>) and distribution coefficient (log D<sub>o/w</sub>) findings of all substances were also acquired from molar absorption coefficients, conductivity and p<sup>H</sup> measurements.<sup>53, 54</sup>

**(Note:** Refer to the manuscript for references of the experimental section: 2a (2.1 – 2.7)

### 3a. Results and Discussions

#### 3.1. Structural Characterization

**Table S1** Analytical and physical data of ligand (**HL**) and its mixed ligand complexes (**1–3**).

| Compounds<br>(EF & FW)                                                                                                 | Colour           | Yield<br>(%) | M.P<br>(°C) | Found (Calcd) (%) |                  |                  |                  | $\Lambda_m$ |
|------------------------------------------------------------------------------------------------------------------------|------------------|--------------|-------------|-------------------|------------------|------------------|------------------|-------------|
|                                                                                                                        |                  |              |             | C                 | H                | N                | M                |             |
| ( <b>HL</b> ) (C <sub>17</sub> H <sub>18</sub> N <sub>2</sub> O <sub>2</sub> )<br>(282.33) Ligand                      | Dark<br>yellow   | 87.52        | 148         | 72.55<br>(72.25)  | 06.53<br>(06.37) | 10.04<br>(09.91) | ----             | 16.12       |
| ( <b>1</b> ) (C <sub>44</sub> H <sub>42</sub> N <sub>6</sub> O <sub>4</sub> )Mn<br>(773.12)[Mn(L) <sub>2</sub> (bpy)]  | Reddish<br>Brown | 77.55        | 208         | 68.38<br>(68.29)  | 05.48<br>(05.43) | 10.93<br>(10.87) | 07.23<br>(07.10) | 45.57       |
| ( <b>2</b> ) (C <sub>44</sub> H <sub>42</sub> N <sub>6</sub> O <sub>4</sub> )Co<br>(777.11) [Co(L) <sub>2</sub> (bpy)] | Dark<br>Brown    | 80.43        | 216         | 68.08<br>(67.94)  | 05.47<br>(05.40) | 10.78<br>(10.81) | 07.66<br>(07.58) | 36.73       |
| ( <b>3</b> ) (C <sub>44</sub> H <sub>42</sub> N <sub>6</sub> O <sub>4</sub> )Ni<br>(776.88)[Ni(L) <sub>2</sub> (bpy)]  | Pale<br>brown    | 78.62        | 178         | 68.09<br>(67.96)  | 05.47<br>(05.41) | 10.80<br>(10.81) | 07.62<br>(07.56) | 41.57       |

EF → Empirical Formula, FW → Formula Weight, M.P → Melting Point,  $\Lambda_m$  → Molar Conductance

##### 3.1.1. Synthesis of Schiff base ligand (**HL**)

2-(4-morpholinobenzylideneamino)phenol Schiff base ligand (**HL**) was synthesized by stirring an equal molar quantity (0.01 M) of ortho amino phenol and 4-(4-morpholinyl) benzaldehyde (0.01 M) in ethanol (30 ml) and the dark yellow precipitate was obtained after refluxing for three hours and in a water bath, the solution's volume was decreased to one-third and cooled at 25 °C. In vacuum desiccators over anhydrous CaCl<sub>2</sub>, the gathered pure dark yellow solid ligand was progressively dried at ambient temperature. It was discovered that the isolated ligand's (**HL**) yield was 87.52 percentages (**Scheme 1**).

##### 3.1.2. Synthesis of mixed ligand complexes (**1-3**)

A solution of synthesized primary ligand (**HL**) (0.002 M) in methanol (40 mL) was gradually added to a solution of Metal(II) acetate salts (0.001 M) [Mn<sup>II</sup>(OAc)<sub>2</sub>·4H<sub>2</sub>O, Co<sup>II</sup>(OAc)<sub>2</sub>·4H<sub>2</sub>O, and Ni<sup>II</sup>(OAc)<sub>2</sub>·4H<sub>2</sub>O] in absolute methanol and the resulting mixture solution were stirred for 30 minutes and the hot mixture of solution was slowly added into methanolic solution of 2,2'-bipyridine (bpy) as secondary ligand (0.001 M). The obtained finally mixture solutions were refluxed for 3 hours. The solid product was obtained by



filtration and they are also purified by recrystallization technique in the presence of methanol-petroleum ether mixture. Moisture and other solvents were removed by anhydrous  $\text{CaCl}_2$  in the vacuum desiccators. Similar techniques were used to synthesize mixed ligand complexes (**1–3**), and the yield was obtained to be 77.55–80.43 % percentages (**Scheme 1**) and they were summarized in **Table S1**.

### 3.1.3. Analytical Methods: Elemental Analysis and Molar Conductance Studies

The synthesized ligand (**HL**) and its mixed ligand complexes (**1–3**) were found to be intensely coloured and they are soluble in  $\text{CH}_3\text{OH}$ ,  $\text{C}_2\text{H}_5\text{OH}$ ,  $\text{CHCl}_3$  and  $\text{DMSO}$ . The molar conductance ( $\wedge_m$ ) was observed in the range of 36.73–45.57  $\text{Ohm}^{-1} \text{cm}^2 \text{mol}^{-1}$ , which was higher than that of free ligand (16.12  $\text{Ohm}^{-1} \text{cm}^2 \text{mol}^{-1}$ ). The molar conductance results are attributed that they are non-electrolytes. The analytical information data and physical properties of all test compounds are enclosed in **Table S1**.

### 3.1.4. Mass Spectra (ESI/LC-MS)

Ligand (**HL**) (**Fig. S1**) shows the molecular ion peak at  $m/z$  282.3 (M) consequent to  $[\text{C}_{17}\text{H}_{18}\text{N}_2\text{O}_2]^+$  and other fragmented molecular ion peaks are found at 244.3 (M+1)  $[\text{C}_{14}\text{H}_{15}\text{N}_2\text{O}_2]^+$ , 216.2 (M+2)  $[\text{C}_{13}\text{H}_{14}\text{N}_2\text{O}]^+$ , 189.3 (M+1)  $[\text{C}_{11}\text{H}_{12}\text{N}_2\text{O}]^+$ , 176.3 (M+2)  $[\text{C}_{11}\text{H}_{12}\text{NO}]^+$ , 162.2 (M+1)  $[\text{C}_{10}\text{H}_{11}\text{NO}]^+$  and 118.1 (M+1)  $[\text{C}_8\text{H}_7\text{N}]^+$ . Complex (**1**) (**Fig. S2**) molecular ion peak at  $m/z$  773.3 (M) consequent to  $[\text{C}_{44}\text{H}_{42}\text{N}_6\text{O}_4\text{Mn}]^+$  and other fragmented molecular ion peaks are found at 666.2 (M)  $[\text{C}_{38}\text{H}_{37}\text{N}_5\text{O}_3\text{Mn}]^+$ , 447.1 (M)  $[\text{C}_{24}\text{H}_{27}\text{N}_3\text{O}_2\text{Mn}]^+$ , 314.3 (M+1)  $[\text{C}_{15}\text{H}_{18}\text{N}_2\text{O}_2\text{Mn}]^+$  and 283.0 (M+1)  $[\text{C}_{17}\text{H}_{18}\text{N}_2\text{O}_2]^+$ . Complex (**2**) (**Fig. S3**) molecular ion peak at  $m/z$  778.1 (M+1) corresponding to  $[\text{C}_{44}\text{H}_{42}\text{N}_6\text{O}_4\text{Co}]^+$  and other fragmented molecular ion peaks are found at 671.9 (M+1)  $[\text{C}_{38}\text{H}_{37}\text{N}_5\text{O}_3\text{Co}]^+$ , 502.7 (M+1)  $[\text{C}_{27}\text{H}_{26}\text{N}_4\text{O}_2\text{Co}]^+$ , 454.2 (M+2)  $[\text{C}_{25}\text{H}_{22}\text{N}_4\text{OCo}]^+$ , 317.1 (M)  $[\text{C}_{15}\text{H}_{18}\text{N}_2\text{O}_2\text{Co}]^+$  and 283.0 (M+1)  $[\text{C}_{17}\text{H}_{18}\text{N}_2\text{O}_2]^+$ . Complex (**3**) (**Fig. S4**) molecular

ion peak at  $m/z$  777.6 (M+1) corresponding to  $[C_{44}H_{42}N_6O_4Ni]^+$  and other fragmented molecular ion peaks are found at 671.7 (M+1)  $[C_{38}H_{37}N_5O_3Ni]^+$ , 502.1 (M+1)  $[C_{27}H_{26}N_4O_2Ni]^+$ , 453.3 (M+1)  $[C_{25}H_{22}N_4ONi]^+$ , 317.5 (M+1)  $[C_{15}H_{18}N_2O_2Ni]^+$  and 283.0 (M+1)  $[C_{17}H_{18}N_2O_2]^+$ . Also, the generation of other peaks are followed by fragmented molecular ion of ligand (**HL**). The observed similar fragmented molecular ion peaks for all complexes were good agreed with molecular structures.<sup>1</sup>

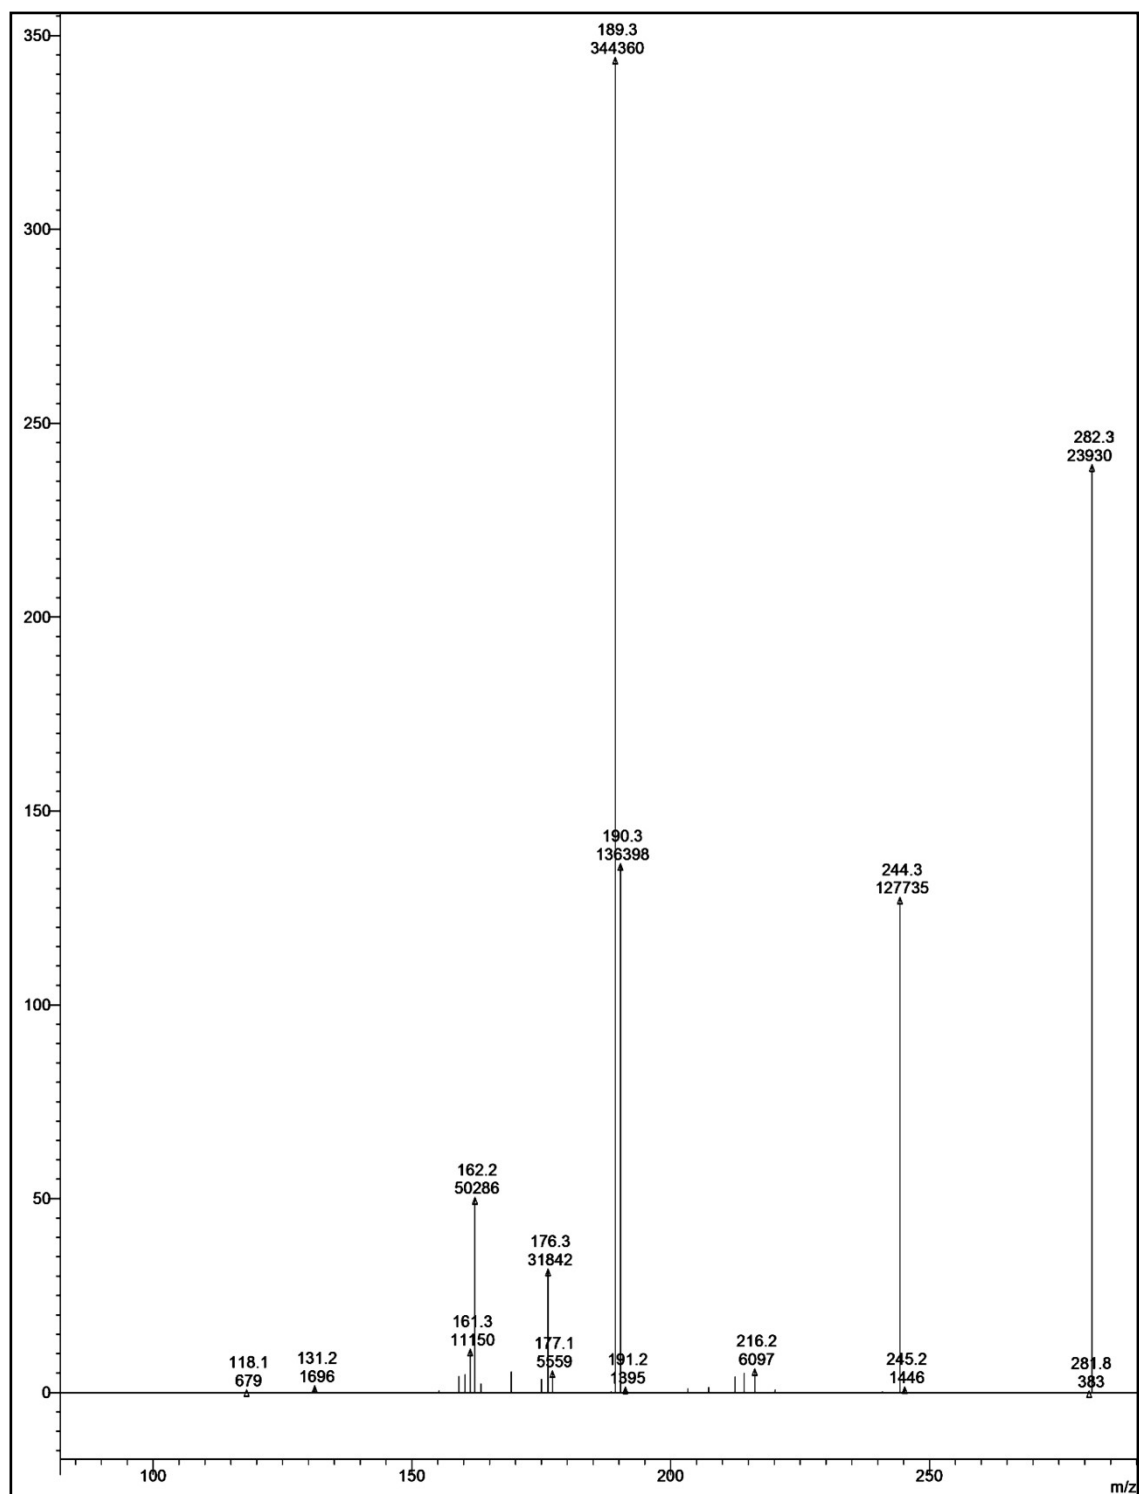

**Fig. S1** ESI-LC/MS mass spectrum of ligand (HL).

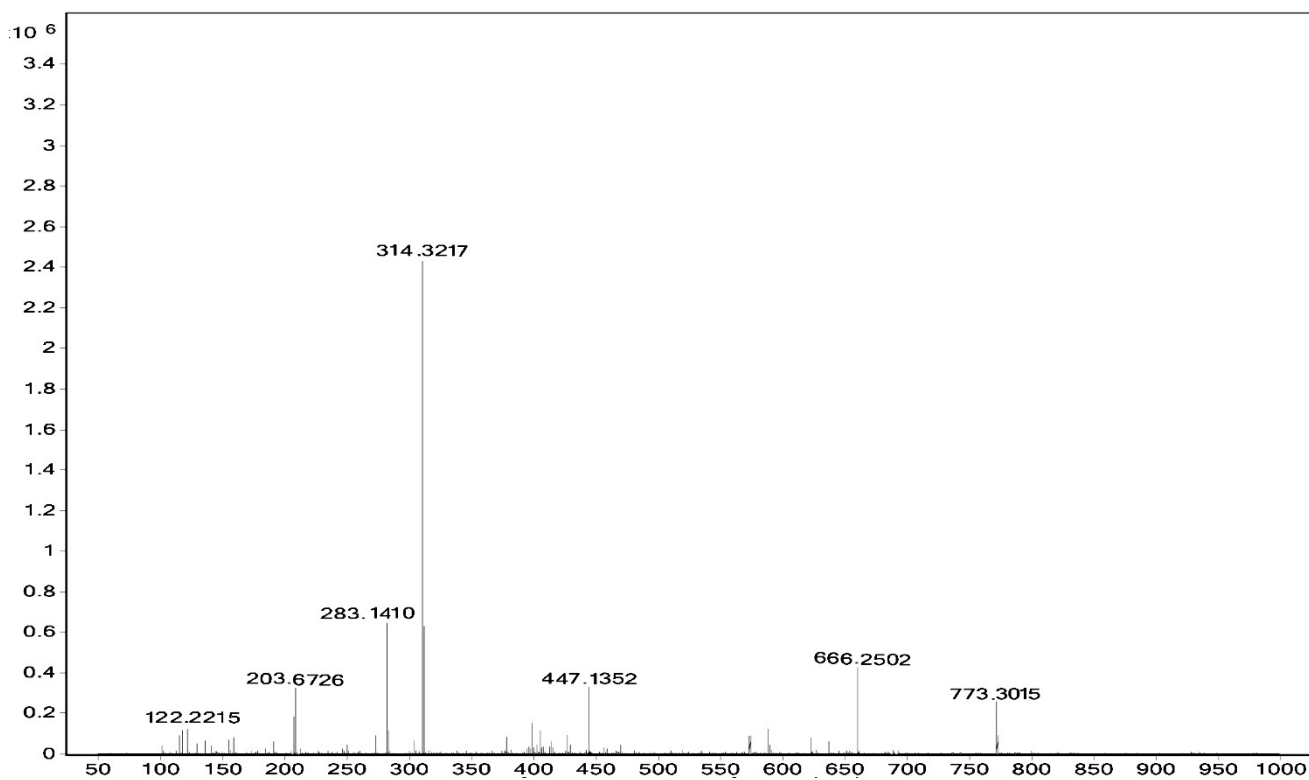

Fig. S2 ESI-LC/MS mass spectrum of complex (1)

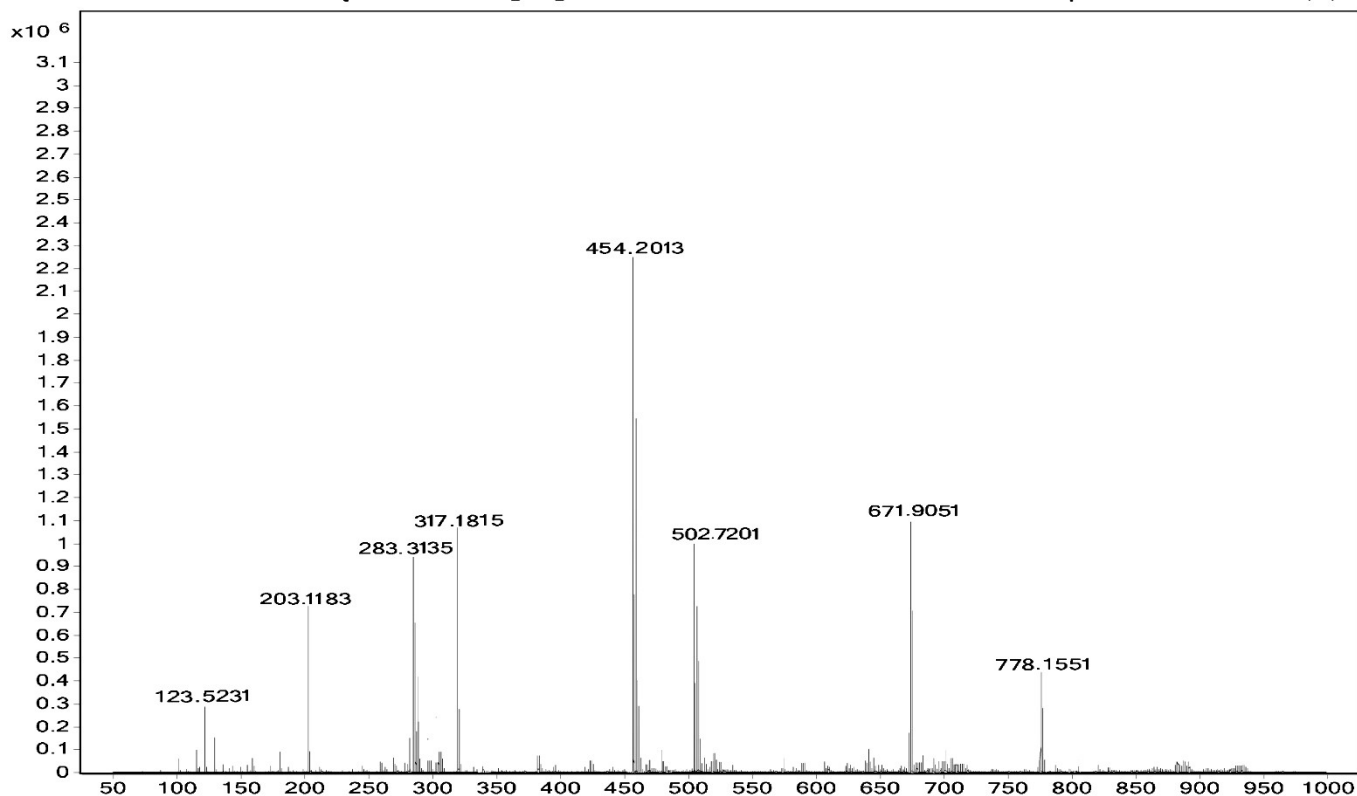

Fig. S3 ESI-LC/MS mass spectrum of complex (2)

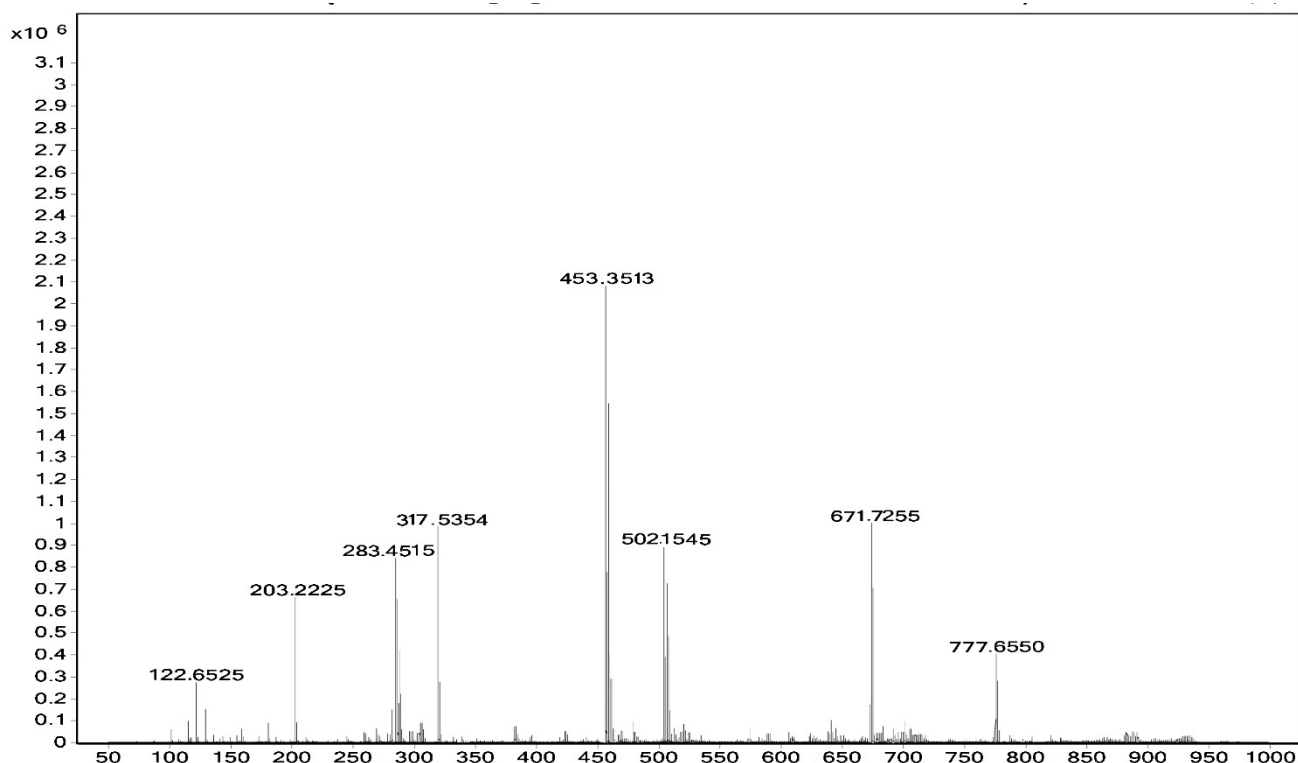

**Fig. S4** ESI-LC/MS mass spectrum of complex (**3**)

### 3.1.5. Proton Nuclear Magnetic Resonance Spectra (<sup>1</sup>H NMR)

The <sup>1</sup>H NMR spectral properties were performed in presence of CDCl<sub>3</sub> solvent using Si(CH<sub>3</sub>)<sub>4</sub> as an internal standard. The ligand (**HL**) demonstrates the following signals in **Fig. S5**. δ values of ligand (**HL**): aromatic protons (m, 8H) at 6.45 –7.65 ppm; azomethine (-HC=N-) proton (s,1H) at 8.58 ppm; morpholinic-OCH<sub>2</sub> protons (t, 4H) at 3.85 ppm; morpholinic-N-CH<sub>2</sub> (t, 4H) at 3.30 ppm; phenolic-OH proton (s, 1H) at 5.10 ppm.<sup>2</sup> Furthermore, the strong singlet peak for CDCl<sub>3</sub> solvent was observed at 7.26 ppm in the ligand (**HL**). Moreover, all complexes (**1–3**) are not supported to <sup>1</sup>H NMR spectral properties, which consist of 3d<sup>5</sup> (**1-Mn<sup>II</sup>**), 3d<sup>7</sup> (**2-Co<sup>II</sup>**), and 3d<sup>8</sup> (**3-Ni<sup>II</sup>**) electronic configurations with paramagnetic due to weak field and high spin ligand and since nickel complex (**3**) consisting of 3d<sup>8</sup>, they have two unpaired electrons in the e<sub>g</sub> orbital on accordance with crystal field theory, they also not supported to <sup>1</sup>H NMR spectral

properties due to low splitting degeneration with low energy gap in the presence of weak field and high spin ligand.

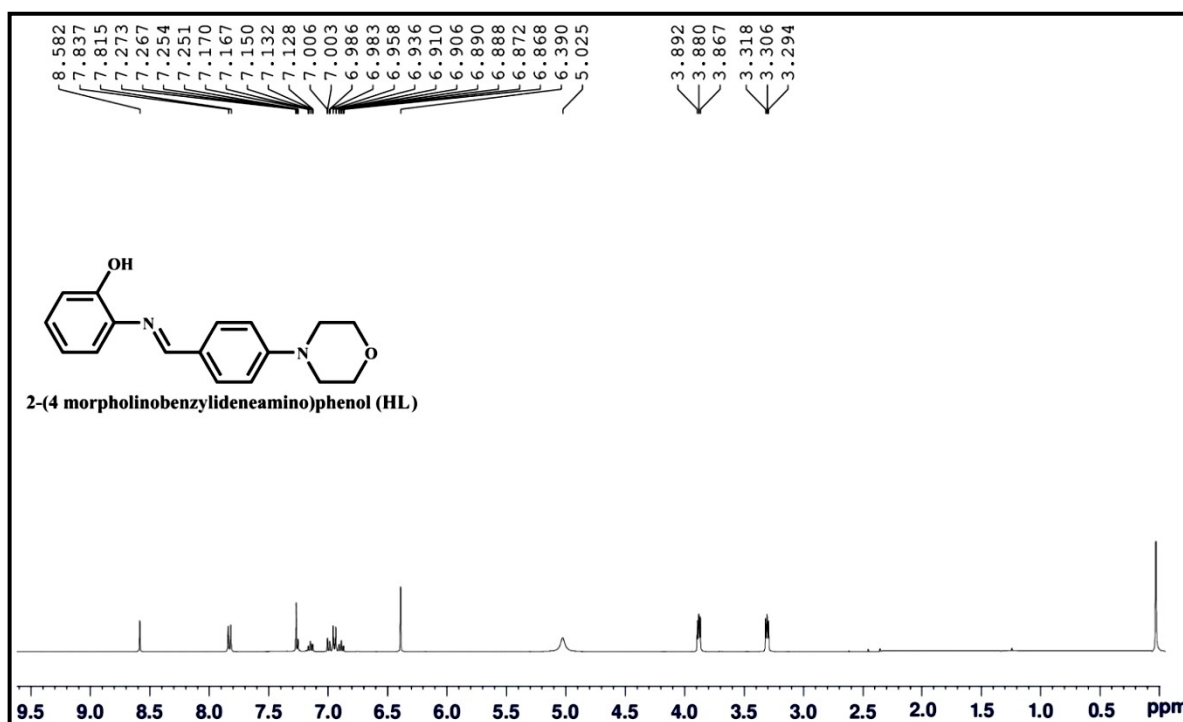

Fig. S5 <sup>1</sup>H NMR spectra of ligand (HL).

### 3.1.6. <sup>13</sup>C NMR spectrum

The <sup>13</sup>C NMR spectrum of the ligand (HL) was recorded by a Bruker Advance III HD Nanobay 400 MHz spectrometer operating in Fourier transform mode in the presence of CDCl<sub>3</sub> at room temperature.<sup>3,4</sup> The following signals of ligand (HL) were demonstrated in Fig. S6. The observed peak at 156.84 ppm was assigned iminic (azomethine) carbons. The aromatic carbons of the ligand (HL) are observed in the range 113.47 – 135.88 ppm. The observed signal in the region 151.95–153.61 ppm indicates the carbon atom adjacent to the phenolic oxygen in the free ligand (HL). The peak of morpholinic-CH<sub>2</sub>-O-CH<sub>2</sub> was found at 66.64 ppm. The chemical shifts for =N-CH<sub>2</sub>-CH<sub>2</sub>-N and =N-CH<sub>2</sub>-CH<sub>2</sub>-N groups were also obtained at 65.19 and 63.35 respectively. The observed peaks at 47.87 and 47.29 ppm are attributed to morpholinic-CH<sub>2</sub>-N-CH<sub>2</sub> carbons. Also, the strong triplet peaks for CDCl<sub>3</sub> solvent were observed in the range of 76.74–77.38 ppm. Moreover, all complexes (1–3) are

not supported to  $^{13}\text{C}$  NMR spectral properties due to weak field and high spin ligand with paramagnetism.

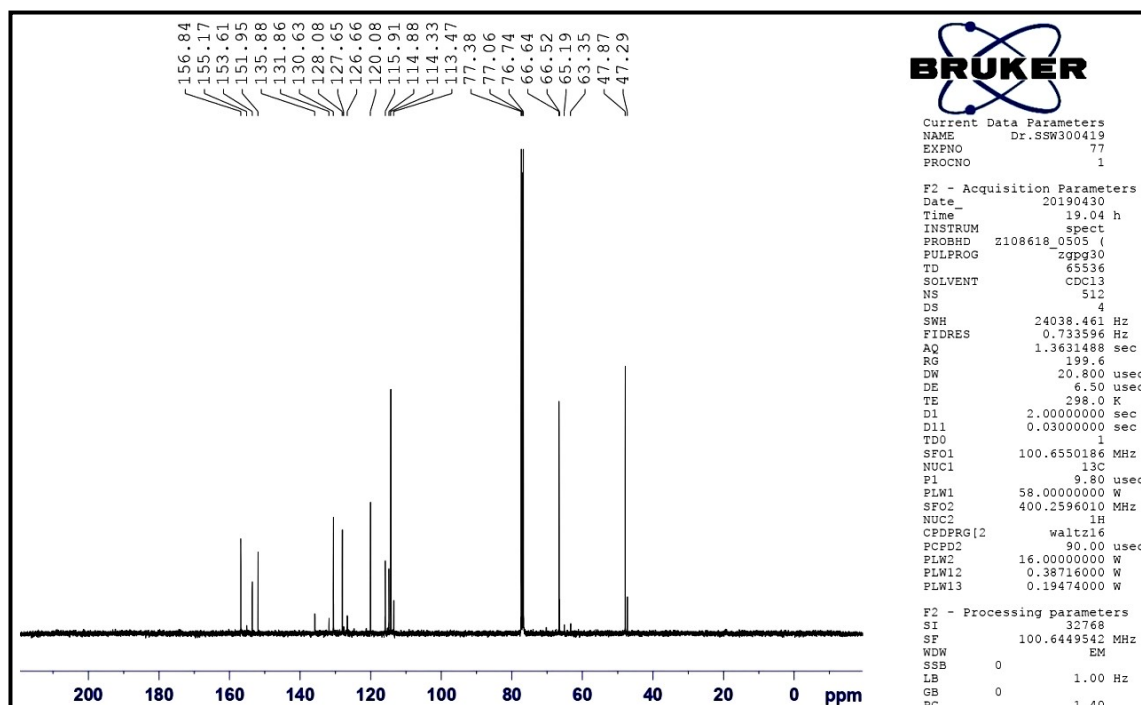

Fig. S6  $^{13}\text{C}$  NMR spectrum of ligand (HL).

### 3.1.7. Fourier Transform Infrared Spectra (FT-IR)

The IR spectra were executed using Shimadzu FT-IR spectrometer ( $4000\text{--}400\text{ cm}^{-1}$ ) using KBr pellets. The FTIR spectra of the mixed ligand complexes (**1–3**) investigated the frequency changes of free ligand (HL) due to the complexation and their observed results were also summarized in **Table S2**. FT-IR spectrum of ligand (HL) exhibits a strong sharp band of the azomethine group ( $-\text{HC}=\text{N}-$ ) at  $1632\text{ cm}^{-1}$  the band is also shifted to lower frequencies in the range of  $1602\text{--}1610\text{ cm}^{-1}$  for all complexes(**1–3**) due to strong complexation with the central metal ion.<sup>5</sup> The sharp peak of the hydroxy group was identified at  $3403\text{ cm}^{-1}$  in the free ligand (HL) and the same peak disappeared in the spectra of all complexes due to deprotonation of  $-\text{OH}$  group during complexation.<sup>6</sup> Also, the broad band was observed in the region of  $3412\text{--}3422\text{ cm}^{-1}$  due to the formation of hydrogen band between iminic hydrogen and a hydroxyl group. It is also evidenced that the observed phenolic C-O group at  $1268\text{ cm}^{-1}$  in the ligand (HL) is shifted to higher

frequencies in the range of 1288–1316  $\text{cm}^{-1}$  in all complexes (1–3) pointing out confirming deprotonation of the phenolic–OH on chelation.<sup>7</sup> In the FT-IR spectra of all mixed ligand complexes, the peaks consequent to the ring stretching frequencies of  $\nu(\text{C}=\text{N})$  and  $\nu(\text{C}=\text{C})$  at 1503, 1422  $\text{cm}^{-1}$  of free 2,2'-bipyridine were shifted to the region of 1516–1542  $\text{cm}^{-1}$  and 1416–1418  $\text{cm}^{-1}$  respectively, which indicate the complexation owing to coordination of the heterocyclic nitrogen atoms to the metal ion.<sup>8</sup> In the far IR spectra of all complexes, the medium bands were found in the region 450–478  $\text{cm}^{-1}$  and 518–528  $\text{cm}^{-1}$ , which are consequent to M–N and M–O vibrations respectively and other absorption bands like morpholinic–C–N–C, morpholinic–C–O–C, aromatic C–H and aliphatic C–H have no appreciable changes in the complexes (1–3) (Fig. S7).

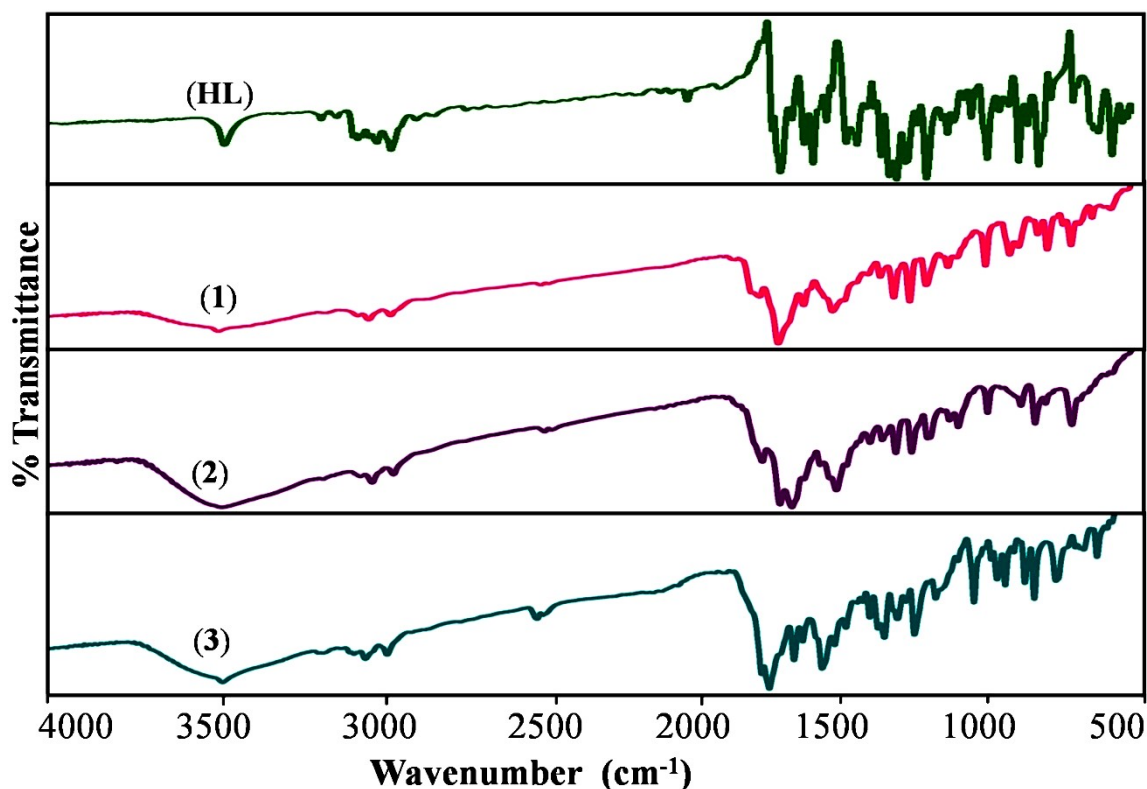

Fig. S7 FT-IR spectra of ligand (HL) and its mixed ligand complexes (1–3).



**Table S2** FT-IR spectral data (cm<sup>-1</sup>) of the ligand (**HL**) and its complexes (**1–3**).

| Com<br>pounds | HC=N | Ph-C-O | Morp-<br>C-N-C | Morp-<br>C-O-C       | C-H        |             |                 | Ph-OH<br>/ H-<br>bond | Bpy<br>C=N<br>&<br>C=C | M-N | M-O |
|---------------|------|--------|----------------|----------------------|------------|-------------|-----------------|-----------------------|------------------------|-----|-----|
|               |      |        |                |                      | Ar-<br>C-H | Ali-<br>C-H | Iminic<br>H-C=N |                       |                        |     |     |
| ( <b>HL</b> ) | 1632 | 1268   | 1341           | 1112 (s)<br>1181(as) | 2974       | 2918        | 2858            | 3403                  | ---                    | --- | --- |
| ( <b>1</b> )  | 1608 | 1304   | 1352           | 1115 (s)<br>1166(as) | 2964       | 2924        | 2850            | 3416                  | 1516<br>1417           | 467 | 528 |
| ( <b>2</b> )  | 1610 | 1312   | 1345           | 1114 (s)<br>1173(as) | 2964       | 2929        | 2850            | 3422                  | 1542<br>1418           | 457 | 526 |
| ( <b>3</b> )  | 1602 | 1307   | 1349           | 1112 (s)<br>1166(as) | 2972       | 2926        | 2851            | 3414                  | 1524<br>1418           | 478 | 526 |

s → symmetry, as → asymmetry, Phen-C-O → Phenolic C-O, Morp-C-N-C → Morpholinic C-N-C, Morp-C-O-C → Morpholinic C-O-C, Ar-C-H → Aromatic C-H, Ali-C-H → Aliphatic C-H Ph-OH → Phenolic OH, bpy → 2,2'-bipyridine.

### 3.1.8. Electronic Absorption Spectra and Magnetic Susceptibility

Ligand (**HL**) and its complexes (**1–3**) were carried out in methanol by an electronic absorption spectrophotometer. The observed results of absorption maxima and magnetic moment are summarized in **Table S3**. The free ligand (**HL**) exhibited three absorption bands at 358 nm (27,933 cm<sup>-1</sup>), 237 nm (42,194 cm<sup>-1</sup>) and 205 nm (48,780 cm<sup>-1</sup>), which assigns n→π\*, π→π\* and π→π\* transitions respectively owing to the azomethine chromophore and phenyl rings.<sup>9</sup> The bands are transferred into a higher wavelength, which attributes the formation of complex due to the lone pair electron of a sp<sup>2</sup>-hybridized orbital of the imino nitrogen in the ligand donates to the metal centre. Moreover, Cobalt complex (**2**) demonstrated the bands at 648 nm (15,432 cm<sup>-1</sup>) and 498 nm (20,080 cm<sup>-1</sup>) consequent to <sup>4</sup>T<sub>1g</sub> (F) → <sup>4</sup>A<sub>2g</sub> (F) (ν<sub>2</sub>) and <sup>4</sup>T<sub>1g</sub> (F) → <sup>4</sup>T<sub>1g</sub> (P) (ν<sub>3</sub>) transitions. On the other hand, the lowest energy bands consequent to <sup>4</sup>T<sub>1g</sub> (F) → <sup>4</sup>T<sub>2g</sub> (F) (ν<sub>1</sub>) transition are not found in the IR region (above 1000 nm) and their μ<sub>eff</sub> value is observed at 5.20 BM, which was also greater than the spin-only value due to orbital angular momentum contribution in d<sup>7</sup> system and the results propose to an octahedral structure.<sup>10-12</sup> Nickel complexes (**3**) displayed three bands at 918 nm (10,893 cm<sup>-1</sup>), 562 nm (17,793 cm<sup>-1</sup>) and 420 nm (23,810 cm<sup>-1</sup>) corresponding to <sup>3</sup>A<sub>2g</sub> (F) → <sup>3</sup>T<sub>2g</sub> (F) (ν<sub>1</sub>), <sup>3</sup>A<sub>2g</sub> (F) → <sup>3</sup>T<sub>1g</sub> (F) (ν<sub>2</sub>) and <sup>3</sup>A<sub>2g</sub> (F) →

${}^3T_{1g}(P)$  ( $\nu_3$ ) transitions and their  $\mu_{\text{eff}}$  value was found in the range of 3.18 B.M. The results lead to an octahedral geometry<sup>13-15</sup> (Table S3 & Fig. S8). Manganese complex (1) has no appearance of absorption bands in the visible region and CFT does not envisage the d-d transitions due to  $d^5$  electronic configuration and have very weakly coloured due to spin forbidden d-d transition and Laporte forbidden.<sup>16</sup> The obtained results suggest that the complex (1) belongs to an octahedral environment around the central metal(II) ion.

**Table S3** Electronic spectral data and magnetic susceptibility values of the synthesized ligand (HL) and its complexes (2–3).

| Compounds | Band Position<br>$\lambda_{\text{max}}$ nm ( $\gamma\text{-cm}^{-1}$ ) | Assignment                                            | $\mu_{\text{eff}}$<br>(B.M) | Geometry   |
|-----------|------------------------------------------------------------------------|-------------------------------------------------------|-----------------------------|------------|
| (HL)      | 358 (27,933)                                                           | $n \rightarrow \pi^*$                                 | --                          | --         |
|           | 237 (42,194)                                                           | $\pi \rightarrow \pi^*$                               |                             |            |
|           | 205 (48,780)                                                           | $\pi \rightarrow \pi^*$                               |                             |            |
| (2)       | 648 (15,432)                                                           | ${}^4T_{1g}(F) \rightarrow {}^4A_{2g}(F)$ ( $\nu_2$ ) | 5.20                        | Octahedral |
|           | 498 (20,080)                                                           | ${}^4T_{1g}(F) \rightarrow {}^4T_{1g}(P)$ ( $\nu_3$ ) |                             |            |
|           | 918 (10,893)                                                           | ${}^3A_{2g}(F) \rightarrow {}^3T_{2g}(F)$ ( $\nu_1$ ) |                             |            |
| (3)       | 562 (17,793)                                                           | ${}^3A_{2g}(F) \rightarrow {}^3T_{1g}(F)$ ( $\nu_2$ ) | 3.18                        | Octahedral |
|           | 420 (23,810)                                                           | ${}^3A_{2g}(F) \rightarrow {}^3T_{1g}(P)$ ( $\nu_3$ ) |                             |            |

INCT  $\rightarrow$  Intra-ligand charge transfer,  $\mu_{\text{eff}} \rightarrow$  Effective magnetic moment, B.M  $\rightarrow$  Bohr magnetons.

$$\text{Wavenumber } (\gamma \text{ cm}^{-1}) = \left( \frac{1}{\text{wavelength}(\text{nm})} \right) = \lambda^{-1} \times 10^7 \text{ cm}^{-1}.$$

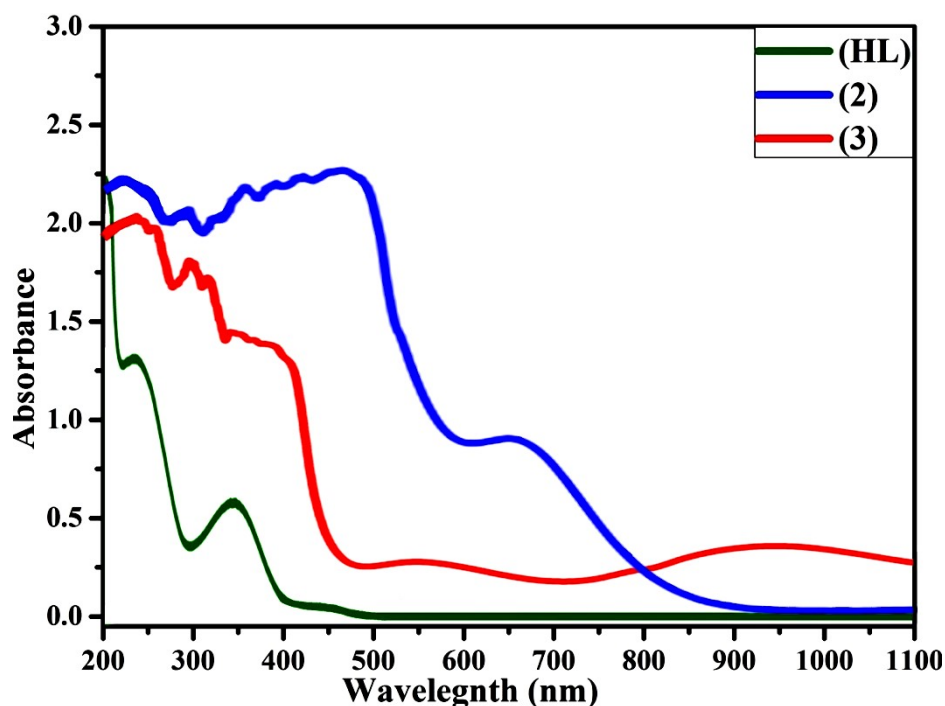

**Fig. S8** Electronic spectra of ligand (HL) and its complexes (2–3).

### 3.1.9. Thermogravimetric Analysis (TGA)

TGA thermograms of the mixed ligand complexes (**1–3**) have been recorded in the temperature range from 40 °C to 730 °C (**Figs. S9 & S10**). The stages of decomposition, temperature range, decomposition products, the obtained mass loss and calculated mass loss percentages of complexes (**1–3**) are summarized in **Table S4**.<sup>17,18</sup> There are exposed three steps during the thermal decomposition of complexes. In the first step process at 40–180°C, the observed weight losses of decomposition of  $[M^{II} (L)_2 (bpy)]$  complexes were found in the range of 10.98–11.06 % respectively, which corresponds to the loss of morpholine moieties ( $C_4H_8NO$ ). In the second degradation stages, the weight losses were evaluated in the temperature range of 180–420 °C, which is further confirmed that the elimination of the rest aromatic part of ligand ( $C_{13}H_9NO$ ) present in the complexes and they are found in the range of 25.02–25.33 % for complexes (**1–3**). Similarly, the obtained weight losses in the third degradation stage at 420–730 °C were pointed out in the range of 55.18–56.42 % elimination of ligand  $C_{17}H_{17}N_2O$  (L) and co-ligands 2,2'-bipyridine [ $C_{10}H_8N_2$ ] in the mixed ligand complexes (**1–3**). The observed final percentage of rest products of metal oxide (MO) residue at above 730 °C was found in the range of 9.24–9.68 % for mixed ligand complexes (**1–3**). The thermal degradation steps of complexes (**1–3**) are shown in the flow chart (**Fig. S9**). Based on the above observations, the proposed structures of all complexes have been demonstrated in the experimental section.

**Table S4** Thermal analysis of complexes (1–3) by TGA method.

| Complexes<br>(M.W)                                                                                               | Step    | Temperature<br>range (°C) | % Weight<br>loss<br>[found<br>(calcd)] | Assignment                                                                                      |
|------------------------------------------------------------------------------------------------------------------|---------|---------------------------|----------------------------------------|-------------------------------------------------------------------------------------------------|
| (1) [Mn(L) <sub>2</sub> (bpy)]<br>(C <sub>44</sub> H <sub>42</sub> N <sub>6</sub> O <sub>4</sub> )Mn<br>(773.12) | I       | 40–180                    | 11.05 (11.12)                          | C <sub>4</sub> H <sub>8</sub> NO                                                                |
|                                                                                                                  | II      | 180–420                   | 25.33 (25.22)                          | C <sub>13</sub> H <sub>9</sub> NO                                                               |
|                                                                                                                  | III     | 420–730                   | 56.42 (56.54)                          | C <sub>17</sub> H <sub>17</sub> N <sub>2</sub> O, C <sub>10</sub> H <sub>8</sub> N <sub>2</sub> |
|                                                                                                                  | Residue | >730                      | 09.24 (09.17)                          | MnO                                                                                             |
| (2) [Co(L) <sub>2</sub> (bpy)]<br>(C <sub>44</sub> H <sub>42</sub> N <sub>6</sub> O <sub>4</sub> )Co<br>(777.11) | I       | 40–180                    | 10.98 (11.06)                          | C <sub>4</sub> H <sub>8</sub> NO                                                                |
|                                                                                                                  | II      | 180–420                   | 25.14 (25.09)                          | C <sub>13</sub> H <sub>9</sub> NO                                                               |
|                                                                                                                  | III     | 420–730                   | 56.18 (56.25)                          | C <sub>17</sub> H <sub>17</sub> N <sub>2</sub> O, C <sub>10</sub> H <sub>8</sub> N <sub>2</sub> |
|                                                                                                                  | Residue | >730                      | 09.68 (09.64)                          | CoO                                                                                             |
| (3) [Ni(L) <sub>2</sub> (bpy)]<br>(C <sub>44</sub> H <sub>42</sub> N <sub>6</sub> O <sub>4</sub> )Ni<br>(776.88) | I       | 40–180                    | 11.00 (11.06)                          | C <sub>4</sub> H <sub>8</sub> NO                                                                |
|                                                                                                                  | II      | 180–420                   | 25.02 (25.10)                          | C <sub>13</sub> H <sub>9</sub> NO                                                               |
|                                                                                                                  | III     | 420–730                   | 56.32 (56.27)                          | C <sub>17</sub> H <sub>17</sub> N <sub>2</sub> O, C <sub>10</sub> H <sub>8</sub> N <sub>2</sub> |
|                                                                                                                  | Residue | >730                      | 09.45 (09.61)                          | NiO                                                                                             |

M.W → Molecular Weight, TGA → Thermo Gravimetric Analysis.

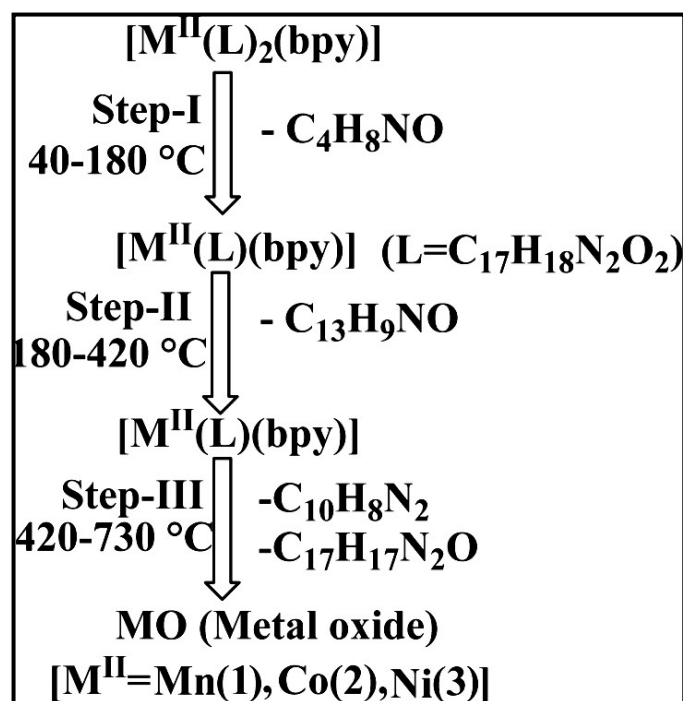**Fig. S9** The various stages for thermal decomposition of complexes (1–3) at temperature range of 40–730 °C.

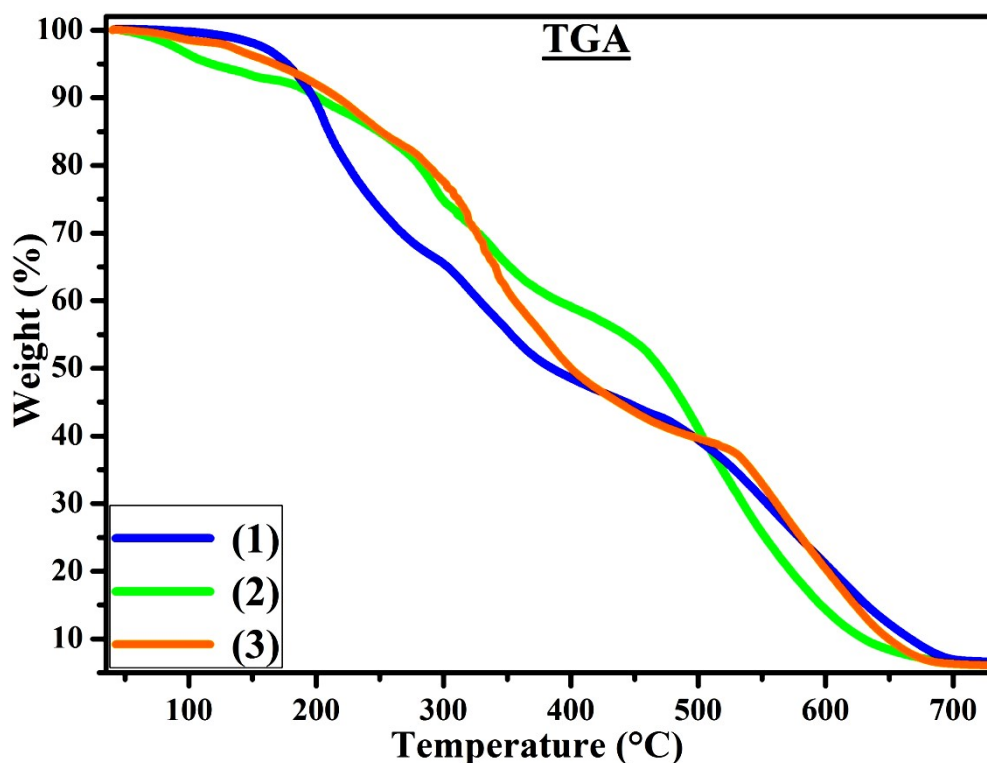

**Fig. S10** TG plots of complexes (1–3) recorded under nitrogen atmosphere between the temperature range 40 and 750 °C at a heating rate of 20° C/min.

### 3.1.11. Single-Crystal X-ray Diffraction Analysis (SCXRD)

Schiff base ligand (**HL**) was obtained as a light yellow coloured single crystalline form in the presence of ethyl acetate medium by slow evaporation of the chloroform and ethanol mixture solution. Single-crystal XRD analysis of Schiff base ligand (**HL**) was performed to attain detailed information on molecular conformations in the solid-state. This analysis also proves the molecular structure and atom connectivity as shown in **Figs. 11 & S12**. The information on the XRD data collection and structure refinements are enclosed in **Table S5** and hydrogen bonding geometry is given in **Table S6**. The crystallographic data were gathered at room temperature with the assistance of MoK $\alpha$  radiation in the wavelength of 0.71073 Å by Bruker AXS KAPPA APEX-2 diffractometer equipped with a graphite monochromator. The molecular structure of ligand was resolved by direct methods and refined by full-matrix least-squares calculations using the SHELXL-2014 program.<sup>19</sup> The

ligand (**HL**) crystalline form was isomorphous in the monoclinic system and its space group P21/c with molecular formula  $C_{17}H_{18}N_2O_2$  in the unit cell. The obtained results were also good agreed with spectral and analytical data. The bond length (Å) between carbon-carbon in the ligand (**HL**) was obtained as C(1)-C(2)→1.197(11), C(2)-C(3)→1.423(13), C(3)-C(4)→1.466(14), C(4)-C(5)→1.410(5), C(5)-C(6)→1.446(5), C(7)-C(8)→1.229(11), C(8)-C(9)→1.382(12), C(9)-C(10)→1.193(11), C(10)-C(11)→1.562(12), C(11)-C(12)→1.377(11), C(12)-C(13)→1.223(12), C(14)-C(15)→1.405(13) and C(16)-C(17)→1.348(13). The bond length (Å) between carbon-hydrogen was observed as C(2)-H(2), C(2)-H(2), C(3)-H(3), C(4)-H(4), C(5)-H(5), C(7)-H(7), C(9)-H(9), C(10)-H(10), C(12)-H(12), C(13)-H(13)→0.9300, C(14)-H (14A), C(14)-H (14B), C(15)-H (15A), C(15)-H (15B), C(16)-H (16A), C(16)-H (16B), C(17)-H (17A), C(17)-H (17B)→0.9700. Also, the bond lengths (Å) for carbon-nitrogen, carbon-oxygen and oxygen-hydrogen atoms were observed as C(6)-N(1)→1.215(10), C(7)-N(1)→1.360(11), C(11)-N(2)→1.266(10), C(14)-N(2)→1.467(12), C(17)-N(2)→1.587(11), C(1)-O(1)→1.420(10), C(15)-O(2)→1.491(12), C(16)-O(2)→1.463(13) and O(1)-H(10)→1.28(14). The bond angle (°) for carbon-carbon-carbon in the ligand (**HL**) was found as C(1)-C(2)-C(3)→105.2(8), C(2)-C(3)-C(4)→137.5(8), C(5)-C(4)-C(3)→120.9(8), C(4)-C(5)-C(6)→96.7(7), C(5)-C(6)-C(1)→139.6(7), C(7)-C(8)-C(9)→109.4(8), C(7)-C(8)-C(13)→122.4(9), C(9)-C(8)-C(13)→128.1(8), C(10)-C(9)-C(8)→107.1(9), C(9)-C(10)-C(11)→124.8(9), C(12)-C(11)-C(10)→128.3(8), C(13)-C(12)-C(11)→105.4(9), C(12)-C(13)-C(8)→126.3(9). Also, The bond angle (°) for carbon-carbon-oxygen, oxygen-carbon-hydrogen, nitrogen-carbon-carbon and carbon-nitrogen-carbon in the ligand (**HL**) was found as C(2)-C(1)-O(1)→105.8(8), O(1)-C(1)-C(6)→134.4(7), C(14)-C(15)-O(2)→116.6(8), O(2)-C(15)-H(15A)→108.1, O(2)-C(15)-H(15B)→108.1, C(17)-C(16)-O(2)→96.1(9), O(2)-C(16)-H(16A)→112.5, O(2)-C(16)-H(16B)→112.5, C(1)-O(1)-H(10)→116(5), C(16)-O(2)-C(15)→121.0(7), N(1)-C(6)-C(5)→106.2(7), N(1)-C(6)-

$C(1) \rightarrow 113.9(7)$ ,  $C(8)-C(7)-N(1) \rightarrow 127.1(9)$ ,  $C(6)-N(1)-C(7) \rightarrow 119.3(7)$ ,  $C(11)-N(2)-C(14) \rightarrow 99.3(7)$ ,  $C(11)-N(2)-C(17) \rightarrow 119.8(7)$ ,  $C(14)-N(2)-C(17) \rightarrow 127.9(7)$ . The two phenyl rings are bridged by the iminic group (HC=N) in the molecular structure of ligand and its bond length (Å) of HC=N was found at 1.360(11) and its bond angle of C(6)=N(1)-C(7) around  $119.3(7)^\circ$ . Also, the bond angle of nitrogen in the  $sp^3$  hybridized morpholine ring system [C(14)-N(2)-C(17)] was  $127.9(7)^\circ$ . The dihedral angle between these two phenyl rings was observed at  $7.8(13)^\circ$ , which demonstrates that both the phenyl rings are almost coplanar. However, the atoms O(1) slightly deviates from the least-squares plane of the phenyl ring.<sup>20</sup> Furthermore, the phenyl rings are stacked face-to-face in crystalline lattice leading to  $\pi$ - $\pi$  interactions, which are further supported to assemble the molecules in the unit cell. The intermolecular interactions, especially classical and non-classical H-bonds are playing an essential role in the generation of the crystal and their physicochemical characteristics.<sup>21</sup> These weak intermolecular interactions and hydrogen bonding interactions can be classified and analyzed with graph-set nomenclature, which is more helpful in comparing the stability of the interactions.<sup>22</sup> However, the crystal packing is stabilized through intra-molecular hydrogen bonding interactions (O-H...N) and  $\pi$ - $\pi$  interactions. The H-bonding dimensions are summarized in **Table S6** and The crystal structure and the unit cell packing arrangement of molecules of the ligand (**HL**) is represented in **Figs. S11 and S12**. Moreover, the morpholine fragments are stabilized in the crystal packing by forming intermolecular hydrogen bonds C(2)-H(2)...O(2) between the morpholine ring oxygen O(2) and the hydrogen atom of phenyl ring [C(2)-H(2)]<sup>23</sup> and the packing may also be completed by hydrophobic van der Waals force attractions between the morpholine bearing ligands. In addition, the intramolecular hydrogen bonds O(1)-H...N between the hydroxyl group and iminic group, may lead to the further stabilization of the molecular structure of the ligand (**HL**) (**Table S6**). In addition, some other crystal data including structure refinement, atomic coordinates, bond lengths [Å] and

angles [°], equivalent isotropic displacement and anisotropic displacement parameters for the ligand (**HL**) are also summarized in the section (Tables S7 – S11).

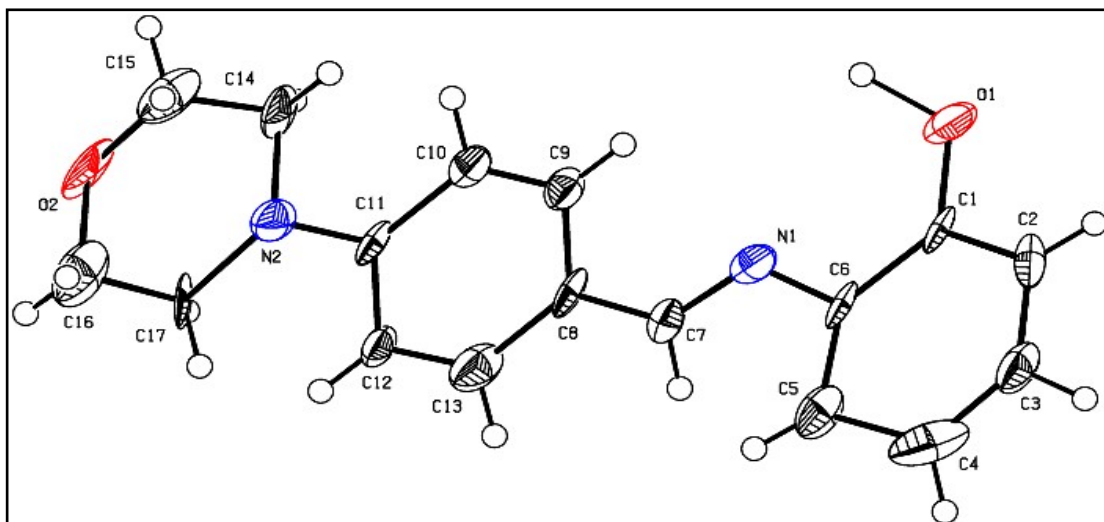

Fig. S11. The crystal structure of the ligand (**HL**) in ORTEP view.

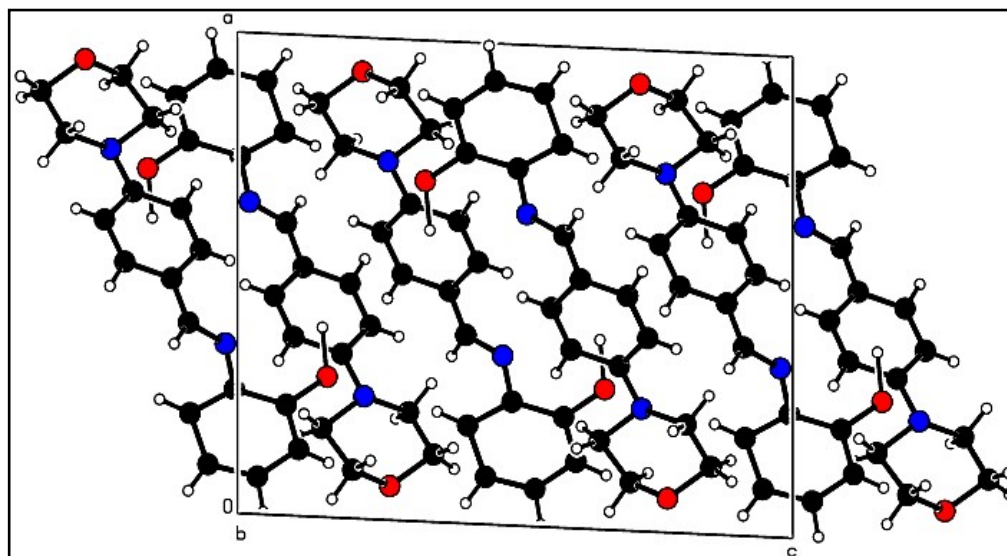

Fig.S12. Unit cell packing diagram of the crystal ligand (**HL**).



**Table S5** Crystal data and structure refinement for the ligand (**HL**).

|                                   |                                                                                                 |
|-----------------------------------|-------------------------------------------------------------------------------------------------|
| Empirical formula                 | C <sub>17</sub> H <sub>18</sub> N <sub>2</sub> O <sub>2</sub>                                   |
| Formula weight                    | 282.33                                                                                          |
| Temperature                       | 101 (2) K                                                                                       |
| Wavelength                        | 0.71073 Å                                                                                       |
| Crystal system                    | Monoclinic                                                                                      |
| Space group                       | P2 <sub>1</sub> /c                                                                              |
| Unit cell dimensions              | a = 14.86 78 (12) Å, α = 90°<br>b = 7.5710 (6) Å, β = 93.197 (2)°<br>c = 12.3380 (8) Å, γ = 90° |
| Volume                            | 1386.65 (18) Å <sup>3</sup>                                                                     |
| Z, calculated Density             | 4, 1.352 Mg/m <sup>3</sup>                                                                      |
| Absorption coefficient            | 0.090 mm <sup>-1</sup>                                                                          |
| F(000)                            | 600                                                                                             |
| Crystal size                      | 0.312 × 0.311 × 0.078 mm                                                                        |
| Theta range for data collection   | θ = 2.744 to 25.332°                                                                            |
| Limiting indices (Index ranges)   | h = -17 → 17<br>k = -09 → 09<br>l = -14 → 14                                                    |
| Reflections collected             | 37050                                                                                           |
| Independent reflections           | 2505 [R(int) = 0.5296]                                                                          |
| Completeness to Δ = 25.242°       | 98.8 %                                                                                          |
| Refinement method                 | Full-matrix least-squares on F <sup>2</sup>                                                     |
| Data / restraints / parameters    | 2505 / 0 / 218                                                                                  |
| Goodness-of-fit on F <sup>2</sup> | 1.222                                                                                           |
| Final R indices [I > 2 σ (I)]     | R1 = 0.1442, wR2 = 0.1293                                                                       |
| R indices (all data)              | R1 = 0.1002, wR2 = 0.0694                                                                       |
| Largest diff. peak and hole       | 0.987 and -0.546 e.Å <sup>-3</sup>                                                              |

**Table S6** Hydrogen bonds for the ligand (**HL**) (Å & °).

| D-H...A            | d(D-H) | d(H...A) | d(D...A)  | <(DHA) |
|--------------------|--------|----------|-----------|--------|
| C(2)-H(2)...O(2)#1 | 0.93   | 2.53     | 3.255(12) | 135.2  |

Symmetry transformations used to generate equivalent atoms: #1 x-1,-y+3/2,z+1/2

**Table S7** Atomic coordinates ( $\times 10^4$ ) and equivalent isotropic displacement parameters ( $\text{\AA}^2 \times 10^3$ ) for Schiff base ligand (**HL**). U(eq) is defined as one third of the trace of the orthogonalized  $U_{ij}$  tensor for the ligand (**HL**).

| <b>Atoms</b> | <b>x</b> | <b>y</b> | <b>z</b> | <b>U(eq)</b> |
|--------------|----------|----------|----------|--------------|
| C(1)         | 2302(6)  | 7693(10) | 5879(6)  | 26(2)        |
| C(2)         | 1389(7)  | 7688(11) | 6100(6)  | 35(2)        |
| C(3)         | 781(7)   | 7005(11) | 5358(7)  | 41(3)        |
| C(4)         | 989(7)   | 6332(12) | 4470(7)  | 58(3)        |
| C(5)         | 2036(6)  | 6333(11) | 4147(5)  | 43(3)        |
| C(6)         | 2575(6)  | 6999(10) | 4947(5)  | 26(2)        |
| C(7)         | 3919(7)  | 6180(11) | 4117(6)  | 30(2)        |
| C(8)         | 4821(6)  | 6283(11) | 3817(6)  | 31(2)        |
| C(9)         | 5443(7)  | 7397(10) | 4336(6)  | 31(2)        |
| C(10)        | 6282(7)  | 7544(11) | 3989(6)  | 34(2)        |
| C(11)        | 6589(6)  | 6600(10) | 3118(6)  | 27(2)        |
| C(12)        | 5979(7)  | 5463(11) | 2607(6)  | 32(2)        |
| C(13)        | 5122(8)  | 5356(12) | 2971(7)  | 44(3)        |
| C(14)        | 8153(7)  | 7373(13) | 3479(6)  | 41(2)        |
| C(15)        | 8989(8)  | 7814(13) | 2922(8)  | 56(3)        |
| C(16)        | 8596(8)  | 6145(14) | 1467(9)  | 61(3)        |
| C(17)        | 7742(7)  | 5617(12) | 1916(6)  | 35(2)        |
| N(1)         | 3516(6)  | 7145(9)  | 4780(5)  | 34(2)        |
| N(2)         | 7452(6)  | 6836(9)  | 2719(5)  | 37(2)        |
| O(1)         | 2918(5)  | 8375(9)  | 6614(4)  | 51(2)        |
| O(2)         | 9292(5)  | 6503(10) | 2254(5)  | 64(2)        |

**Table S8** Bond lengths [ $\text{\AA}$ ] and angles [ $^\circ$ ] for the ligand (HL).

| Positions of atoms | Bond lengths [ $\text{\AA}$ ] and bond angles [ $^\circ$ ] |
|--------------------|------------------------------------------------------------|
| C(1)-C(2)          | 1.197(11)                                                  |
| C(1)-O(1)          | 1.420(10)                                                  |
| C(1)-C(6)          | 1.550(12)                                                  |
| C(2)-C(3)          | 1.423(13)                                                  |
| C(2)-H(2)          | 0.93                                                       |
| C(3)-C(4)          | 1.466(14)                                                  |
| C(3)-H(3)          | 0.93                                                       |
| C(4)-C(5)          | 1.410(5)                                                   |
| C(4)-H(4)          | 0.93                                                       |
| C(5)-C(6)          | 1.446(5)                                                   |
| C(5)-H(5)          | 0.93                                                       |
| C(6)-N(1)          | 1.215(10)                                                  |
| C(7)-C(8)          | 1.229(11)                                                  |
| C(7)-N(1)          | 1.360(11)                                                  |
| C(7)-H(7)          | 0.93                                                       |
| C(8)-C(9)          | 1.382(12)                                                  |
| C(8)-C(13)         | 1.521(13)                                                  |
| C(9)-C(10)         | 1.193(11)                                                  |
| C(9)-H(9)          | 0.93                                                       |
| C(10)-C(11)        | 1.562(12)                                                  |
| C(10)-H(10)        | 0.93                                                       |
| C(11)-N(2)         | 1.266(10)                                                  |
| C(11)-C(12)        | 1.377(11)                                                  |
| C(12)-C(13)        | 1.223(12)                                                  |
| C(12)-H(12)        | 0.93                                                       |
| C(13)-H(13)        | 0.93                                                       |
| C(14)-C(15)        | 1.405(13)                                                  |
| C(14)-N(2)         | 1.467(12)                                                  |
| C(14)-H(14A)       | 0.97                                                       |
| C(14)-H(14B)       | 0.97                                                       |
| C(15)-O(2)         | 1.491(12)                                                  |
| C(15)-H(15A)       | 0.97                                                       |
| C(15)-H(15B)       | 0.97                                                       |
| C(16)-C(17)        | 1.348(13)                                                  |
| C(16)-O(2)         | 1.463(13)                                                  |
| C(16)-H(16A)       | 0.97                                                       |
| C(16)-H(16B)       | 0.97                                                       |
| C(17)-N(2)         | 1.587(11)                                                  |
| C(17)-H(17A)       | 0.97                                                       |
| C(17)-H(17B)       | 0.97                                                       |
| O(1)-H(1O)         | 1.28(14)                                                   |
| C(2)-C(1)-O(1)     | 105.8(8)                                                   |

|                     |          |
|---------------------|----------|
| C(2)-C(1)-C(6)      | 119.8(8) |
| O(1)-C(1)-C(6)      | 134.4(7) |
| C(1)-C(2)-C(3)      | 105.2(8) |
| C(1)-C(2)-H(2)      | 127.4    |
| C(3)-C(2)-H(2)      | 127.4    |
| C(2)-C(3)-C(4)      | 137.5(8) |
| C(2)-C(3)-H(3)      | 111.3    |
| C(4)-C(3)-H(3)      | 111.3    |
| C(5)-C(4)-C(3)      | 120.9(8) |
| C(5)-C(4)-H(4)      | 119.5    |
| C(3)-C(4)-H(4)      | 119.5    |
| C(4)-C(5)-C(6)      | 96.7(7)  |
| C(4)-C(5)-H(5)      | 131.6    |
| C(6)-C(5)-H(5)      | 131.6    |
| N(1)-C(6)-C(5)      | 106.2(7) |
| N(1)-C(6)-C(1)      | 113.9(7) |
| C(5)-C(6)-C(1)      | 139.6(7) |
| C(8)-C(7)-N(1)      | 127.1(9) |
| C(8)-C(7)-H(7)      | 116.5    |
| N(1)-C(7)-H(7)      | 116.5    |
| C(7)-C(8)-C(9)      | 109.4(8) |
| C(7)-C(8)-C(13)     | 122.4(9) |
| C(9)-C(8)-C(13)     | 128.1(8) |
| C(10)-C(9)-C(8)     | 107.1(9) |
| C(10)-C(9)-H(9)     | 126.5    |
| C(8)-C(9)-H(9)      | 126.5    |
| C(9)-C(10)-C(11)    | 124.8(9) |
| C(9)-C(10)-H(10)    | 117.6    |
| C(11)-C(10)-H(10)   | 117.6    |
| N(2)-C(11)-C(12)    | 106.8(8) |
| N(2)-C(11)-C(10)    | 124.8(8) |
| C(12)-C(11)-C(10)   | 128.3(8) |
| C(13)-C(12)-C(11)   | 105.4(9) |
| C(13)-C(12)-H(12)   | 127.3    |
| C(11)-C(12)-H(12)   | 127.3    |
| C(12)-C(13)-C(8)    | 126.3(9) |
| C(12)-C(13)-H(13)   | 116.9    |
| C(8)-C(13)-H(13)    | 116.9    |
| C(15)-C(14)-N(2)    | 92.2(8)  |
| C(15)-C(14)-H(14A)  | 113.3    |
| N(2)-C(14)-H(14A)   | 113.3    |
| C(15)-C(14)-H(14B)  | 113.3    |
| N(2)-C(14)-H(14B)   | 113.3    |
| H(14A)-C(14)-H(14B) | 110.6    |
| C(14)-C(15)-O(2)    | 116.6(8) |
| C(14)-C(15)-H(15A)  | 108.1    |
| O(2)-C(15)-H(15A)   | 108.1    |

|                     |          |
|---------------------|----------|
| C(14)-C(15)-H(15B)  | 108.1    |
| O(2)-C(15)-H(15B)   | 108.1    |
| H(15A)-C(15)-H(15B) | 107.3    |
| C(17)-C(16)-O(2)    | 96.1(9)  |
| C(17)-C(16)-H(16A)  | 112.5    |
| O(2)-C(16)-H(16A)   | 112.5    |
| C(17)-C(16)-H(16B)  | 112.5    |
| O(2)-C(16)-H(16B)   | 112.5    |
| H(16A)-C(16)-H(16B) | 110      |
| C(16)-C(17)-N(2)    | 114.0(8) |
| C(16)-C(17)-H(17A)  | 108.7    |
| N(2)-C(17)-H(17A)   | 108.7    |
| C(16)-C(17)-H(17B)  | 108.7    |
| N(2)-C(17)-H(17B)   | 108.7    |
| H(17A)-C(17)-H(17B) | 107.6    |
| C(6)-N(1)-C(7)      | 119.3(7) |
| C(11)-N(2)-C(14)    | 99.3(7)  |
| C(11)-N(2)-C(17)    | 119.8(7) |
| C(14)-N(2)-C(17)    | 127.9(7) |
| C(1)-O(1)-H(1O)     | 116(5)   |
| C(16)-O(2)-C(15)    | 121.0(7) |

---

Symmetry transformations used to generate equivalent atoms

**Table S9** Anisotropic displacement parameters ( $\text{\AA}^2 \times 10^3$ ) for the ligand (**HL**). The anisotropic displacement factor exponent takes the form:  $-2\pi^2[h^2a^2U^{11} + \dots + 2hkab^*U^{12}]$ .

| Atoms | U <sup>11</sup> | U <sup>22</sup> | U <sup>33</sup> | U <sup>23</sup> | U <sup>13</sup> | U <sup>12</sup> |
|-------|-----------------|-----------------|-----------------|-----------------|-----------------|-----------------|
| C(1)  | 8(3)            | 24(3)           | 48(4)           | 6(3)            | 10(3)           | -1(2)           |
| C(2)  | 32(6)           | 30(5)           | 44(6)           | 1(4)            | 23(5)           | 1(4)            |
| C(3)  | 19(5)           | 38(6)           | 66(7)           | -5(5)           | 10(5)           | 1(4)            |
| C(4)  | 44(7)           | 29(6)           | 99(9)           | -1(6)           | -32(6)          | -2(5)           |
| C(5)  | 19(5)           | 48(6)           | 62(7)           | 3(5)            | 1(4)            | 9(4)            |
| C(6)  | 8(3)            | 24(3)           | 48(4)           | 6(3)            | 10(3)           | -1(2)           |
| C(7)  | 18(5)           | 36(5)           | 36(5)           | 2(4)            | 5(4)            | 1(4)            |
| C(8)  | 7(4)            | 34(5)           | 53(6)           | 5(5)            | 8(4)            | 3(4)            |
| C(9)  | 24(5)           | 25(5)           | 44(6)           | -4(4)           | 8(4)            | -4(4)           |
| C(10) | 24(5)           | 38(5)           | 42(6)           | -4(5)           | 5(4)            | -8(4)           |
| C(11) | 8(4)            | 25(5)           | 47(6)           | 5(4)            | 5(4)            | 0(4)            |
| C(12) | 15(5)           | 34(5)           | 47(6)           | -11(5)          | 9(4)            | -3(4)           |
| C(13) | 26(6)           | 37(5)           | 70(7)           | -9(5)           | 0(5)            | 1(4)            |
| C(14) | 14(5)           | 53(6)           | 56(6)           | -4(5)           | 11(4)           | 8(4)            |
| C(15) | 24(6)           | 47(7)           | 97(9)           | -1(6)           | -6(6)           | 1(5)            |
| C(16) | 31(6)           | 47(7)           | 108(10)         | -5(6)           | 14(6)           | 10(5)           |
| C(17) | 21(5)           | 38(5)           | 49(6)           | -4(5)           | 28(4)           | 5(4)            |
| N(1)  | 24(4)           | 38(5)           | 41(5)           | -3(4)           | -1(3)           | -7(3)           |
| N(2)  | 21(4)           | 40(5)           | 50(5)           | -14(4)          | 1(4)            | 4(3)            |
| O(1)  | 23(4)           | 58(4)           | 71(5)           | -22(4)          | 0(3)            | -13(3)          |
| O(2)  | 7(3)            | 74(5)           | 111(6)          | -14(5)          | 8(4)            | 1(3)            |

**Table S10** Hydrogen coordinates ( $\times 10^4$ ) and isotropic displacement parameters ( $\text{\AA}^2 \times 10^3$ ) for the ligand (**HL**).

| <b>Atoms</b> | <b>x</b>  | <b>y</b>  | <b>z</b> | <b>U(eq)</b> |
|--------------|-----------|-----------|----------|--------------|
| H(2)         | 1133      | 8053      | 6642     | 42           |
| H(3)         | 52        | 6977      | 5467     | 49           |
| H(4)         | 422       | 5898      | 4114     | 70           |
| H(5)         | 2295      | 6012      | 3599     | 52           |
| H(7)         | 3463      | 5353      | 3862     | 36           |
| H(9)         | 5245      | 7933      | 4858     | 37           |
| H(10)        | 6792      | 8274      | 4257     | 41           |
| H(12)        | 6178      | 4895      | 2095     | 38           |
| H(13)        | 4604      | 4640      | 2704     | 53           |
| H(14A)       | 7874      | 8346      | 3800     | 49           |
| H(14B)       | 8339      | 6442      | 3886     | 49           |
| H(15A)       | 9622      | 8078      | 3297     | 68           |
| H(15B)       | 8784      | 8856      | 2604     | 68           |
| H(16A)       | 8442      | 7165      | 1112     | 74           |
| H(16B)       | 8880      | 5247      | 1095     | 74           |
| H(17A)       | 7886      | 4473      | 2148     | 42           |
| H(17B)       | 7122      | 5540      | 1503     | 42           |
| H(1O)        | 3940(110) | 8420(160) | 6530(80) | 110(40)      |

**Table S11** Torsion angles [ $^{\circ}$ ] for for the ligand (**HL**).

| Positions of atoms      | Torsion angles [ $^{\circ}$ ] |
|-------------------------|-------------------------------|
| O(1)-C(1)-C(2)-C(3)     | 179.9(6)                      |
| C(6)-C(1)-C(2)-C(3)     | -1.0(11)                      |
| C(1)-C(2)-C(3)-C(4)     | 1.4(15)                       |
| C(2)-C(3)-C(4)-C(5)     | -3.2(16)                      |
| C(3)-C(4)-C(5)-C(6)     | 3.5(11)                       |
| C(4)-C(5)-C(6)-N(1)     | -177.9(7)                     |
| C(4)-C(5)-C(6)-C(1)     | -4.6(13)                      |
| C(2)-C(1)-C(6)-N(1)     | 176.6(9)                      |
| O(1)-C(1)-C(6)-N(1)     | -4.7(13)                      |
| C(2)-C(1)-C(6)-C(5)     | 3.8(15)                       |
| O(1)-C(1)-C(6)-C(5)     | -177.6(9)                     |
| N(1)-C(7)-C(8)-C(9)     | 7.8(13)                       |
| N(1)-C(7)-C(8)-C(13)    | -169.2(8)                     |
| C(7)-C(8)-C(9)-C(10)    | -175.5(9)                     |
| C(13)-C(8)-C(9)-C(10)   | 1.3(13)                       |
| C(8)-C(9)-C(10)-C(11)   | -0.9(13)                      |
| C(9)-C(10)-C(11)-N(2)   | 175.4(10)                     |
| C(9)-C(10)-C(11)-C(12)  | -0.3(15)                      |
| N(2)-C(11)-C(12)-C(13)  | -175.1(8)                     |
| C(10)-C(11)-C(12)-C(13) | 1.2(13)                       |
| C(11)-C(12)-C(13)-C(8)  | -0.8(13)                      |
| C(7)-C(8)-C(13)-C(12)   | 176.0(10)                     |
| C(9)-C(8)-C(13)-C(12)   | -0.4(15)                      |
| N(2)-C(14)-C(15)-O(2)   | -49.9(10)                     |
| O(2)-C(16)-C(17)-N(2)   | 46.5(10)                      |
| C(5)-C(6)-N(1)-C(7)     | -23.2(11)                     |
| C(1)-C(6)-N(1)-C(7)     | 161.6(7)                      |
| C(8)-C(7)-N(1)-C(6)     | 173.3(9)                      |
| C(12)-C(11)-N(2)-C(14)  | -156.1(7)                     |
| C(10)-C(11)-N(2)-C(14)  | 27.4(10)                      |
| C(12)-C(11)-N(2)-C(17)  | -11.9(10)                     |
| C(10)-C(11)-N(2)-C(17)  | 171.6(7)                      |
| C(15)-C(14)-N(2)-C(11)  | -171.9(7)                     |
| C(15)-C(14)-N(2)-C(17)  | 48.1(11)                      |
| C(16)-C(17)-N(2)-C(11)  | 171.0(9)                      |
| C(16)-C(17)-N(2)-C(14)  | -56.0(13)                     |
| C(17)-C(16)-O(2)-C(15)  | -61.2(11)                     |
| C(14)-C(15)-O(2)-C(16)  | 72.9(12)                      |

Symmetry transformations used to generate equivalent atoms



## References

1. K. Sakthikumar, J. Dhaveethu Raja, R. Vijay Solomon, M. Sankarganesh, Density functional theory molecular modelling, DNA interactions, antioxidant, antimicrobial, anticancer and biothermodynamic studies of bioactive water-soluble mixed ligand complexes, *J. Biomol. Struct.* 37 (2018) 2498–2514, <http://dx.doi.org/10.1080/07391102.2018.1492970>.
2. K. Sakthikumar, R.V. Solomon, J.D. Raja, Spectro-electrochemical assessments of DNA/BSA interactions, cytotoxicity, radical scavenging and pharmacological implications of biosensitive and biologically active morpholine-based metal(II) complexes: a combined experimental and computational investigation, *RSC Advances*. 9 (2019) 14220–14241, <http://dx.doi.org/10.1039/c8ra09218d>.
3. Y.M. Song, Q. Wu, P.J. Yang, N.N. Luan, L.F. Wang, Y.M. Liu, DNA Binding and cleavage activity of Ni(II) complex with all-trans retinoic acid, *J. Inorg. Biochem.* 100 (2006) 1685–1691, <http://dx.doi.org/10.1016/j.jinorgbio.2006.06.00>.
4. K. Sakthikumar, J.D. Raja, M. Sankarganesh, J. Rajesh, Antimicrobial, Antioxidant and DNA Interaction Studies of Water-soluble Complexes of Schiff Base Bearing Morpholine Moiety, *Indian J. Pharm. Sci.* 80 (2018) 723–738, <http://dx.doi.org/10.4172/pharmaceutical-sciences.1000413>.
5. E.S. Aazam, A.F. EL Hussein, H.M. Al-Amri, Synthesis and photoluminescent properties of a Schiff-base ligand and its mononuclear Zn(II), Cd(II), Cu(II), Ni(II) and Pd(II)metal complexes, *Arab. J. Chem.* 5 (2012) 45–53, <http://dx.doi.org/10.1016/j.arabjc.2010.07.022>.
6. N. Raman, S. Ali, D. Raja, Designing, synthesis and spectral characterization of Schiff base transition metal complexes: DNA cleavage and antimicrobial activity studies, *J. Serb. Chem. Soc.* 73 (2008) 1063–10711, <http://dx.doi.org/10.2298/jsc0811063r>.

7. Y. Li, Z.Y. Yang, Z.C. Liao, Z.C. Han, Z.C. Liu, Synthesis, crystal structure, DNA binding properties and antioxidant activities of transition metal complexes with 3-carbaldehyde-chromone semicarbazone, *Inorg. Chem. Commun.* 13 (2010)1213–1216, <https://doi.org/10.1016/j.inoche.2010.07.005>.
8. G.D. Dimitrov, M.S. Atanassova, Synthesis and Spectroscopic Characterization of a Complex of 1, 10-Phenanthroline with Magnesium, *Z. anorg. allg. Chem.* 629 (2003) 12–14, <https://doi.org/10.1002/zaac.200390005>.
9. M. Shakir, A. Abbasi, M. Azam, A.U. Khan, Synthesis, spectroscopic studies and crystal structure of the Schiff base ligand L derived from condensation of 2-thiophenecarboxaldehyde and 3,3'-diaminobenzidine and its complexes with Co(II), Ni(II), Cu(II), Cd(II) and Hg(II): Comparative DNA binding studies of L and its Co(II), Ni(II) and Cu(II) complexes, *Spectrochim. Acta A Mol. Biomol.* 79 (2011) 1866–1875, <http://dx.doi.org/10.1016/j.saa.2011.05.077>.
10. N. Raman, Y.P. Raja, A. Kulandaisamy, Synthesis and characterisation of Cu(II), Ni(II), Mn(II), Zn(II) and VO(II) Schiff base complexes derived from phenylenediamine and acetoacetanilide, *J. Chem. Sci.* 113 (2001) 183–189, <https://doi.org/10.1007/bf02704068>.
11. A.B.P Lever, *Inorganic Electronic Spectroscopy*, second ed., Elsevier, Amsterdam, Foundations of Electron Spin Resonance, Academic Press, New York, (1978) 1-420.
12. T. Sato, T. Nakamura, The complexes formed in the divalent transition metal-sulphuric acid-di-(2-ethylhexyl)-phosphoric acid extraction systems-cobalt(II), nickel(II) and copper(II) complexes, *J. inorg. nucl. Chem.* 34 (1972) 3721–3730, [https://doi.org/10.1016/0022-1902\(72\)80017-4](https://doi.org/10.1016/0022-1902(72)80017-4).
13. A. B. P. Lever, Electronic spectra of some transition metal complexes: Derivation of Dq and B, *J. Chem. Educ.* 45 (1968) 711, <https://doi.org/10.1021/ed045p711>.

14. A. Kumar Singh, R. Mukherjee, Structure and properties of bivalent nickel and copper complexes with pyrazine-amide-thioether coordination: stabilization of trivalent nickel, Dalton Trans.17 (2005) 2886, <https://doi.org/10.1039/b504893a>.
15. F. Blasco, L. Perelló, J. Latorre, J. Borrás, S. García-Granda, Cobalt(II), Nickel(II), and Copper(II) complexes of sulfanilamide derivatives: Synthesis, spectroscopic studies, and antibacterial activity. Crystal structure of [Co(sulfacetamide)<sub>2</sub>(NCS)<sub>2</sub>], J. Inorg. Biochem. 61 (1996)143–154, [https://doi.org/10.1016/0162-0134\(95\)00053-4](https://doi.org/10.1016/0162-0134(95)00053-4).
16. P.K. Panchal, H.M. Parekh, P.B. Pansuriya, M.N. Patel, Bactericidal activity of different oxovanadium(IV) complexes with schiff bases and application of chelation theory, J. Enzyme Inhib. Med. Chem. 21 (2006) 203-209, <https://doi.org/10.1080/14756360500535229>.
17. W. Gurnule, P. Rahangdale, L. Paliwal, R. Kharat, Synthesis, characterization and ion-exchange properties of 4-hydroxyacetophenone, biuret and formaldehyde terpolymer resins, React. Funct. Polym. 55 (2003) 255–265, [http://dx.doi.org/10.1016/s1381-5148\(03\)00016-6](http://dx.doi.org/10.1016/s1381-5148(03)00016-6).
18. P.P. Kalbende, M.V. Tarase, A.B. Zade, Preparation, Characterization, and Thermal Degradation Studies of p-Nitrophenol-Based Copolymer, J. Chem. 2013 (2013) 1–9, <https://doi.org/10.1155/2013/846327>.
19. M.G. Miguel, S. Nunes, S.A. Dandlen, A.M. Cavaco, M.D. Antunes, Phenols, flavonoids and antioxidant activity of aqueous and methanolic extracts of propolis (*Apis mellifera* L.) from Algarve, South Portugal, Food. Sci. Tech (Campinas). 34 (2014) 16–23, <http://dx.doi.org/10.1590/s0101-20612014000100002>.
20. Boora, E. Chirisa, S. Mukanganyama, Evaluation of Nitrite Radical Scavenging Properties of Selected Zimbabwean Plant Extracts and Their Phytoconstituents, J. Food Proc. 2014 (2014) 1–7, <http://dx.doi.org/10.1155/2014/918018>.

21. S. Shujah, N. Khalid, S. Ali, Homobimetallic organotin(IV) complexes with succinohydrazide Schiff base: Synthesis, spectroscopic characterization and biological screening, *Russ. J. Gen. Chem.* 87 (2017) 515–522, <http://dx.doi.org/10.1134/s1070363217030227>.
22. M. Balouiri, M. Sadiki, S.K. Ibsouda, Methods for in vitro evaluating antimicrobial activity: A review, *J. Pharm. Analysis.* 6 (2016) 71–79, <http://dx.doi.org/10.1016/j.jpha.2015.11.005>.
23. I. Ali, W.A. Wani, K. Saleem, M.F. Hsieh, Anticancer metallo drugs of glutamic acid sulphonamides: in silico, DNA binding, hemolysis and anticancer studies, *RSC Adv.* 4 (2014) 29629–29641, <http://dx.doi.org/10.1039/c4ra02570a>.

## Supplementary Figures

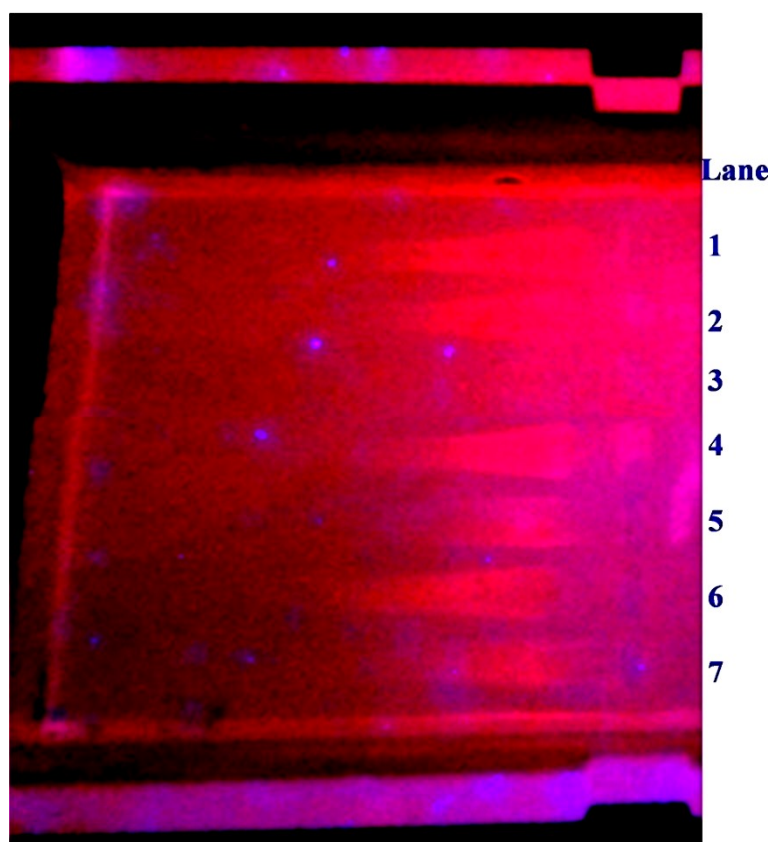

**Fig. S13.** Raw data for electrophoretic gels and blots showing the chemical nuclease activity of CT-DNA by the synthesized ligand (**HL**) and its complexes (**1–3**) in the presence of hydrogen peroxide. Lane: 1 DNA alone + H<sub>2</sub>O<sub>2</sub>; Lane: 2 ligand (**HL**) + DNA + H<sub>2</sub>O<sub>2</sub> ; Lane: 4 complex (**1**) + DNA + H<sub>2</sub>O<sub>2</sub>; Lane: 5 complex (**2**) + DNA + H<sub>2</sub>O<sub>2</sub>; Lane: 6 complex (**3**) + DNA + H<sub>2</sub>O<sub>2</sub> excluding Lanes: 3 and 7, which belongs to another scheme.

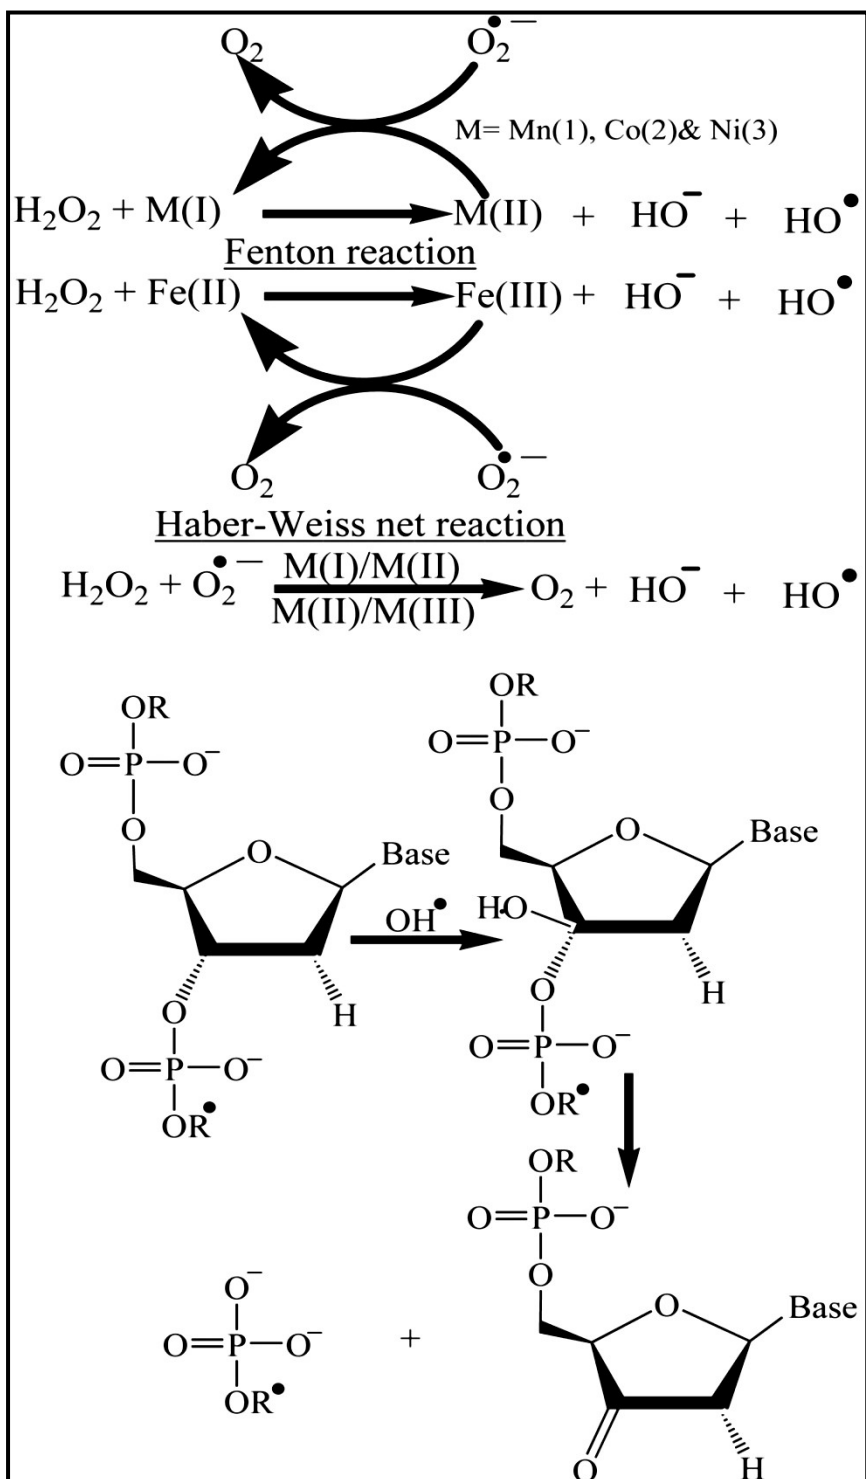

**Fig. S14.** Fenton and Haber-Weiss mechanisms for DNA cleavage in the  $\text{H}_2\text{O}_2$  environment.

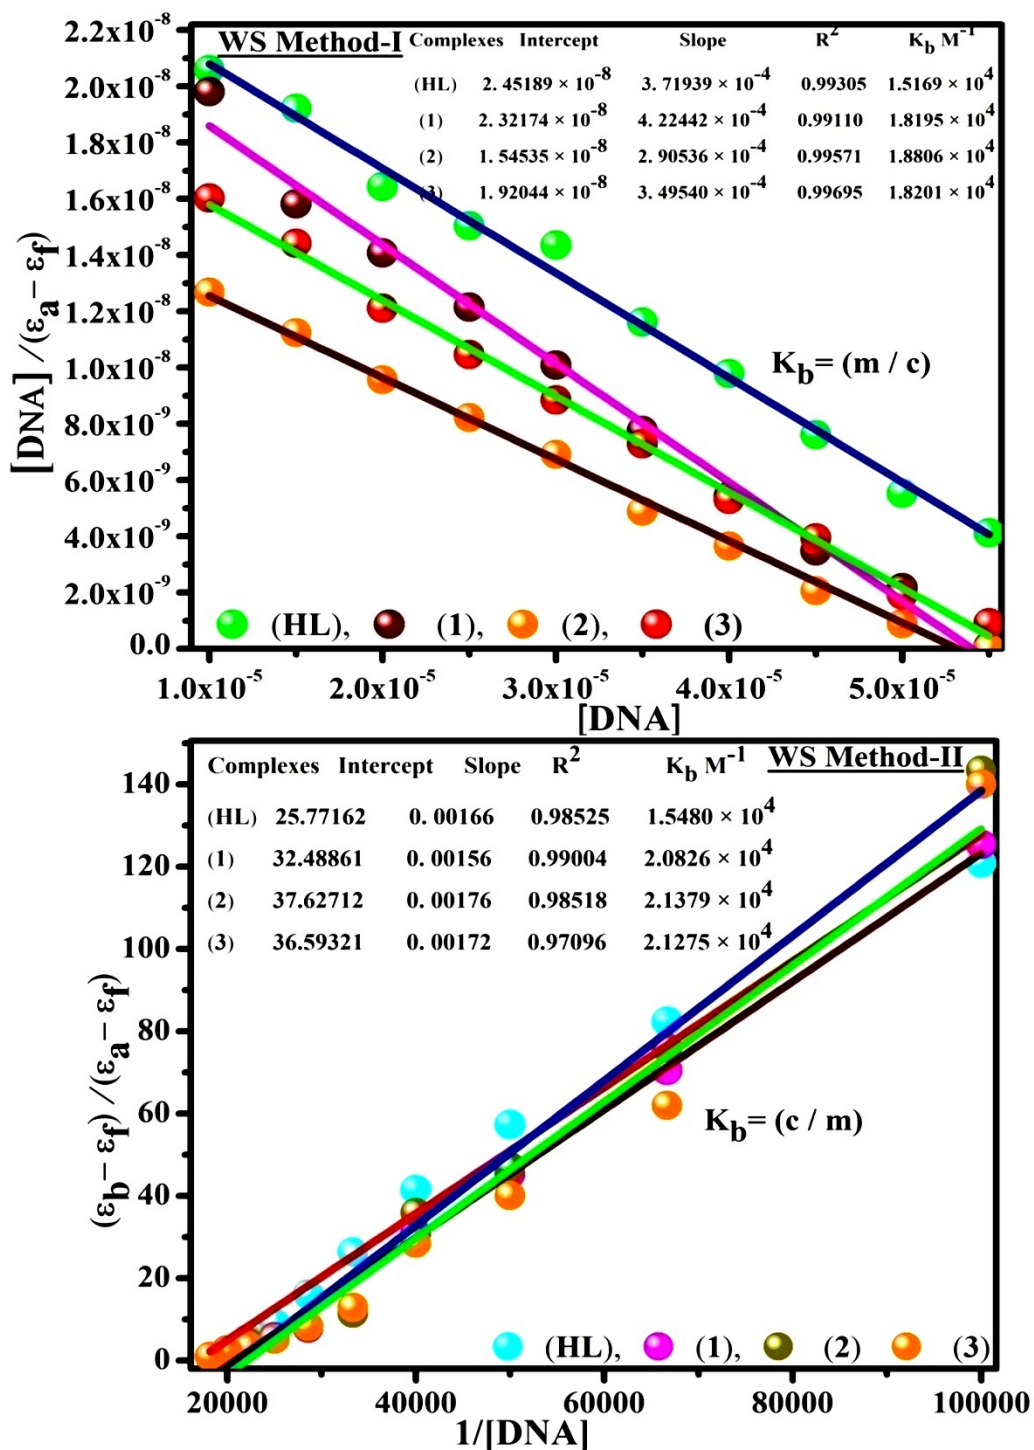

**Fig.S15.** Linear plots of  $\{[DNA] / (\epsilon_a - \epsilon_f)\}$  vs  $[DNA]$  and  $\{(\epsilon_b - \epsilon_f) / (\epsilon_a - \epsilon_f)\}$  vs  $[DNA]^{-1}$  by Wolfe-Shimmer methods (I & II) for the estimation of the intrinsic DNA binding constants ( $K_b$ ) for ligand (HL) and complexes (1–3).

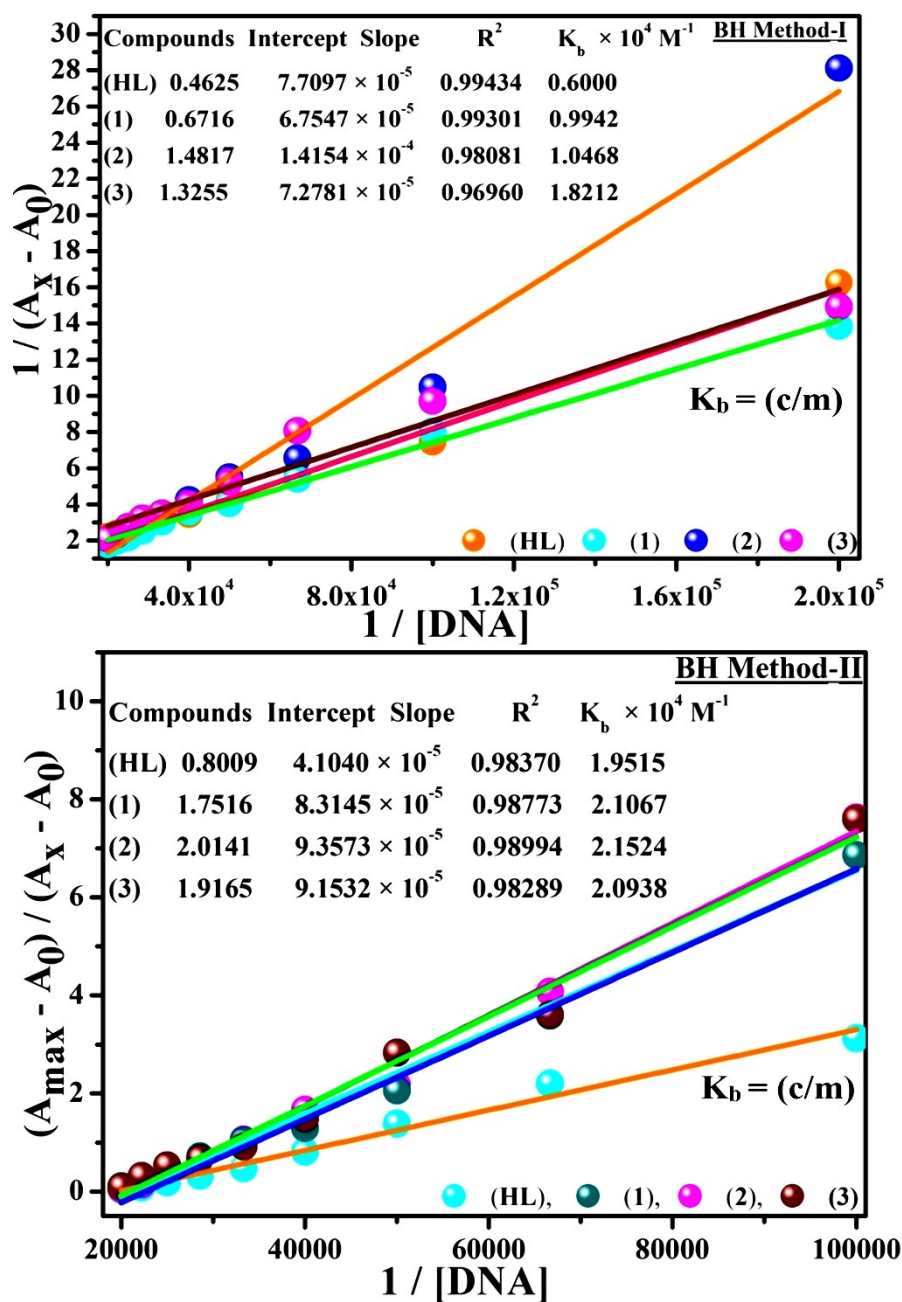

**Fig.S16.** Linear plots of  $[1 / (A_x - A_0)]$  vs  $\{1 / [\text{DNA}]\}$  M<sup>-1</sup> and  $[(A_{\text{max}} - A_0) / (A_x - A_0)]$  vs  $\{1 / [\text{DNA}]\}$  M<sup>-1</sup> by Benesi-Hildebrand (I & II) methods for the estimation of the intrinsic DNA binding constants (K<sub>b</sub>) for ligand (HL) and complexes (1–3).



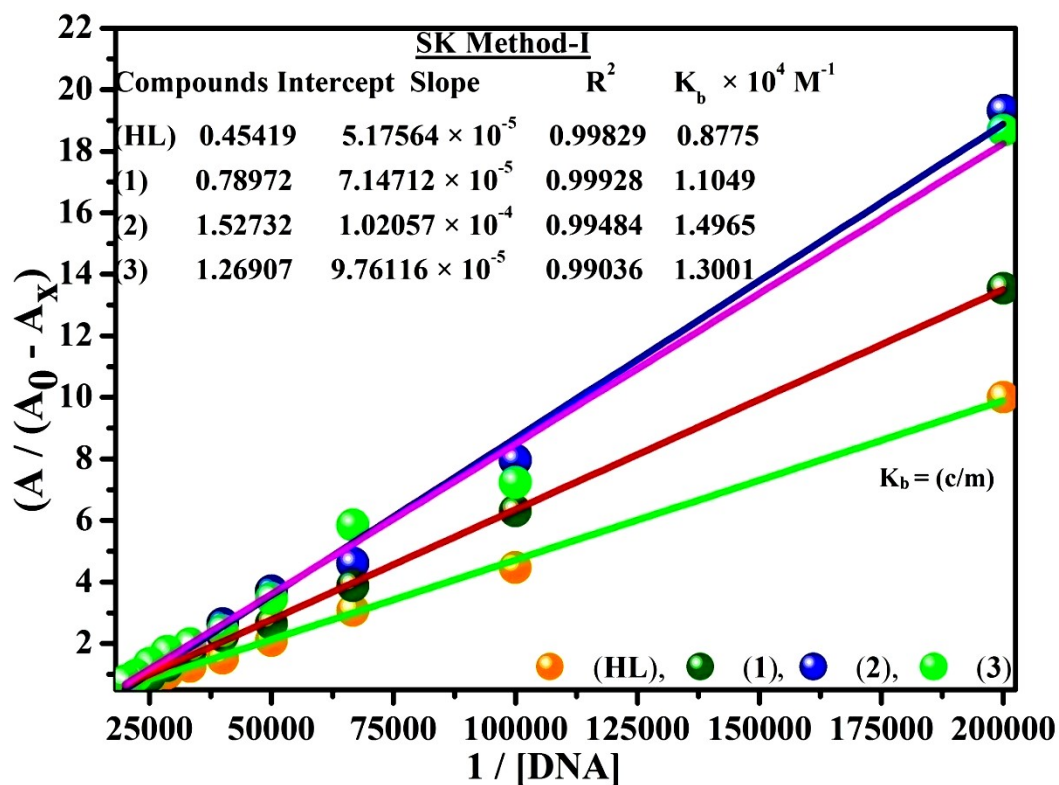

Fig.S17. Linear plot of  $[(A / (A_0 - A_x))] \text{ vs } \{1 / [DNA]\} \text{ M}^{-1}$  by Sakthi-Krause method I for the estimation of the intrinsic DNA binding constants ( $K_b$ ) for ligand (HL) and complexes (1–3).

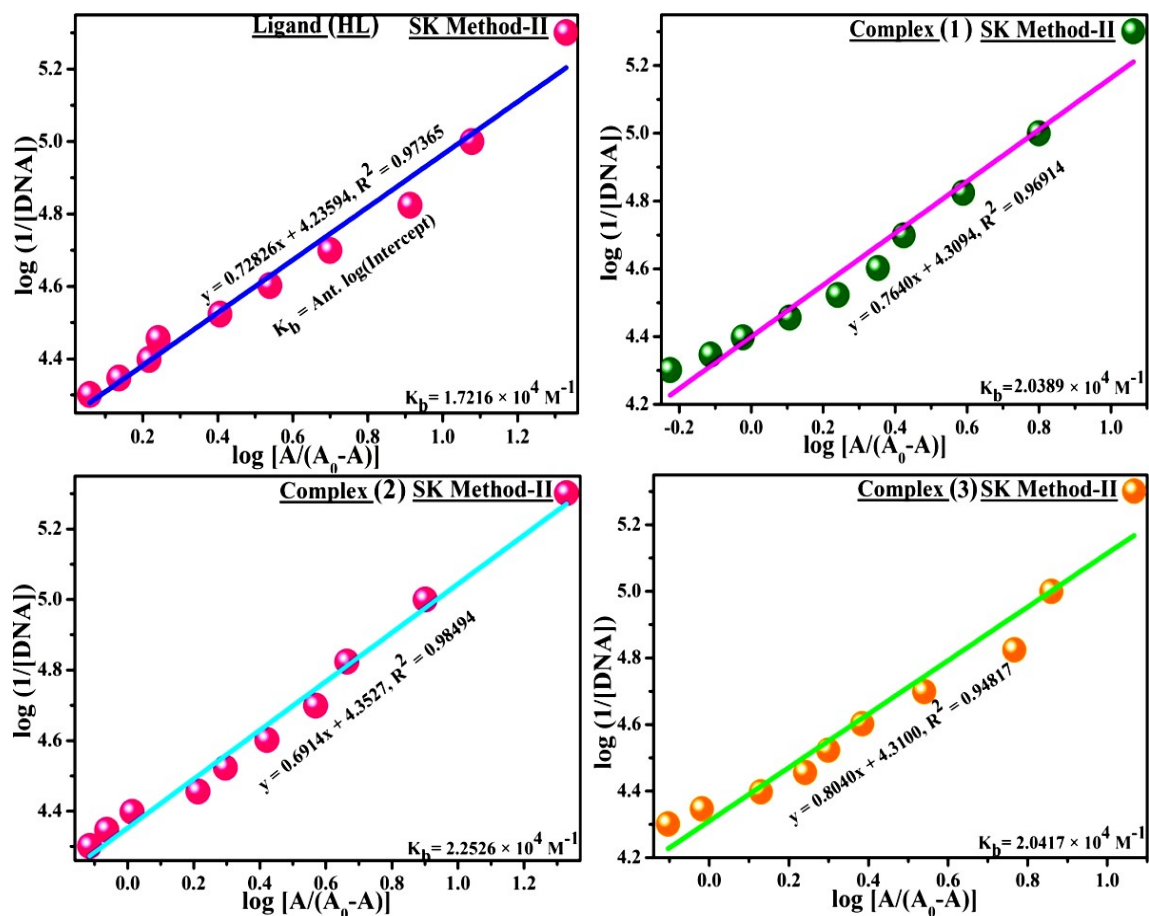

**Fig.S18.** Linear plot of  $\log\{1 / [DNA]\} \text{ M}^{-1}$  vs  $\log [(A / (A_0-A))]$  by Sakthi-Krause method II for the determination of the intrinsic DNA binding constant ( $K_b$ ) for ligand (HL) and complexes (1–3).

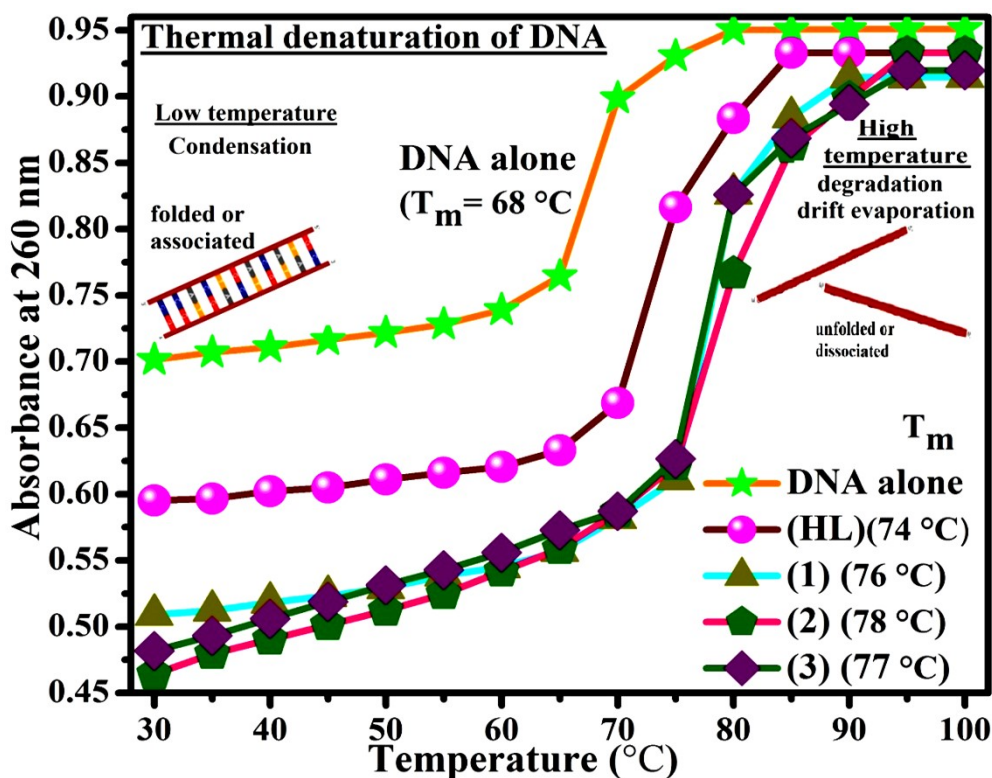

Fig.S19. DNA thermal denaturation profile at 260 nm in the absence and presence of compounds in 5mM Tris-HCl /50 mM NaCl buffer pH = 7.2, [DNA] / [Complex] = 1(R). The denaturation temperature ( $T_m$ ) was taken as the mid-point of the hyperchromic transition.

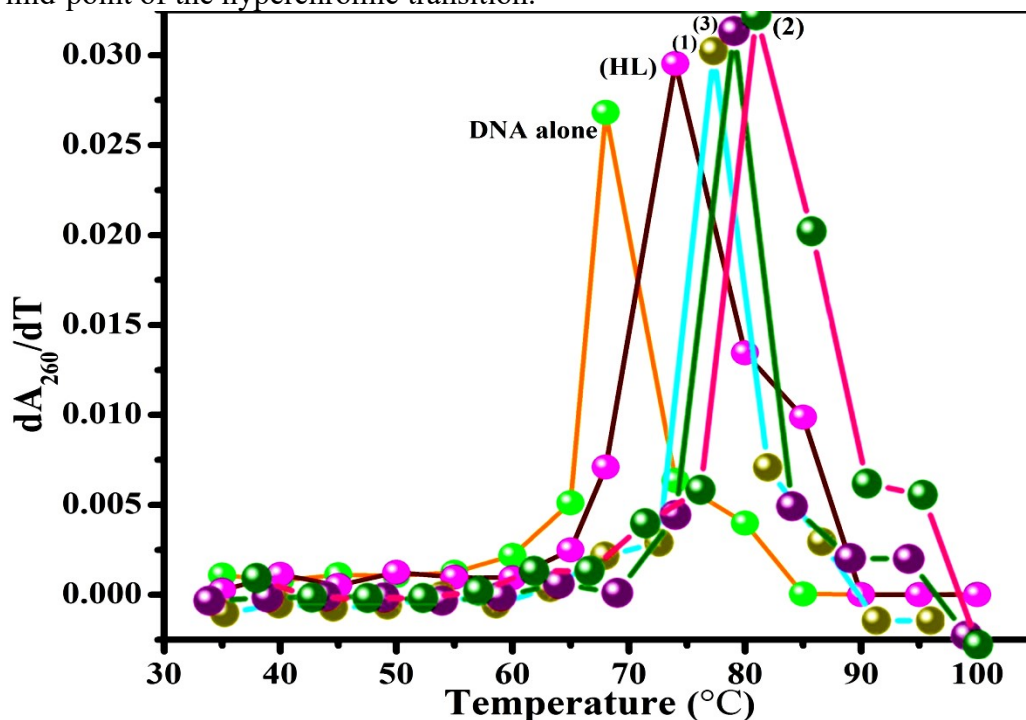

Fig.S19a. Derivative melting curve for DNA thermal denaturation at 260 nm in the absence and presence of compounds in 5mM Tris-HCl /50 mM NaCl buffer pH = 7.2, [DNA] / [Complex] = 1(R)

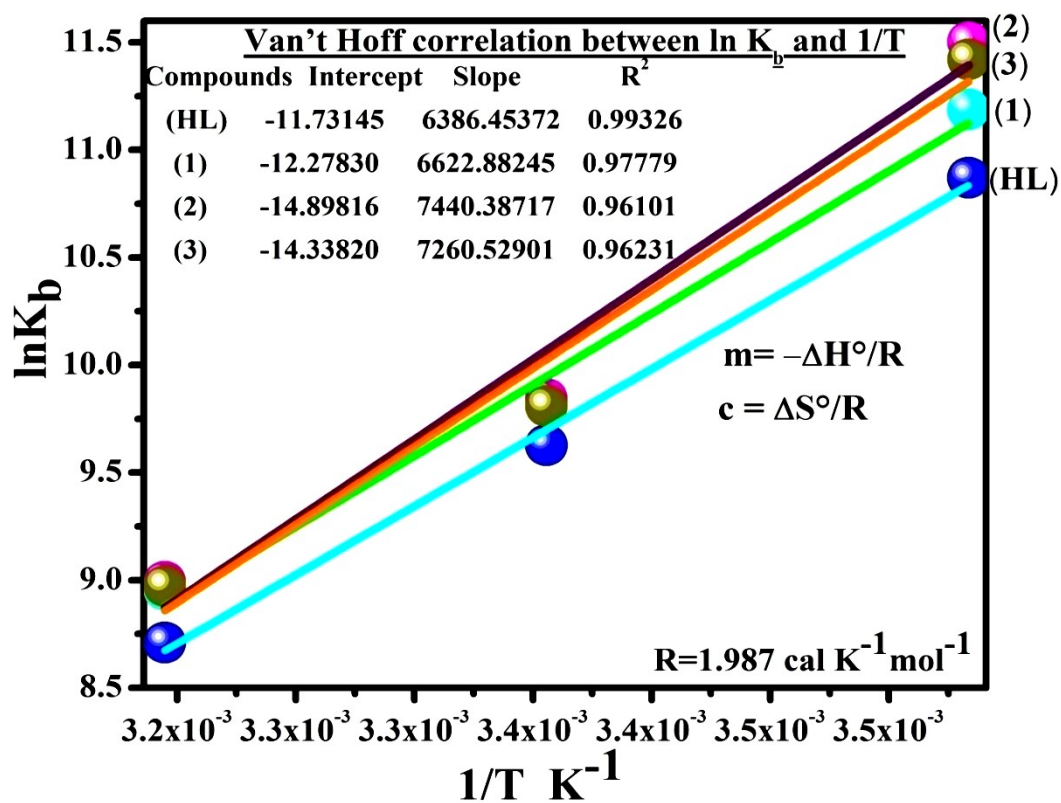

**Fig. S20.** The van't Hoff plot of  $\ln K_b$  versus  $1/T$  ( $\text{K}^{-1}$ ) for the binding of test compounds to CT-DNA. The slope ( $m$ ) and intercept ( $c$ ) of the plot are equal to  $-\Delta H^\circ/R$  and  $\Delta S^\circ/R$ , respectively.

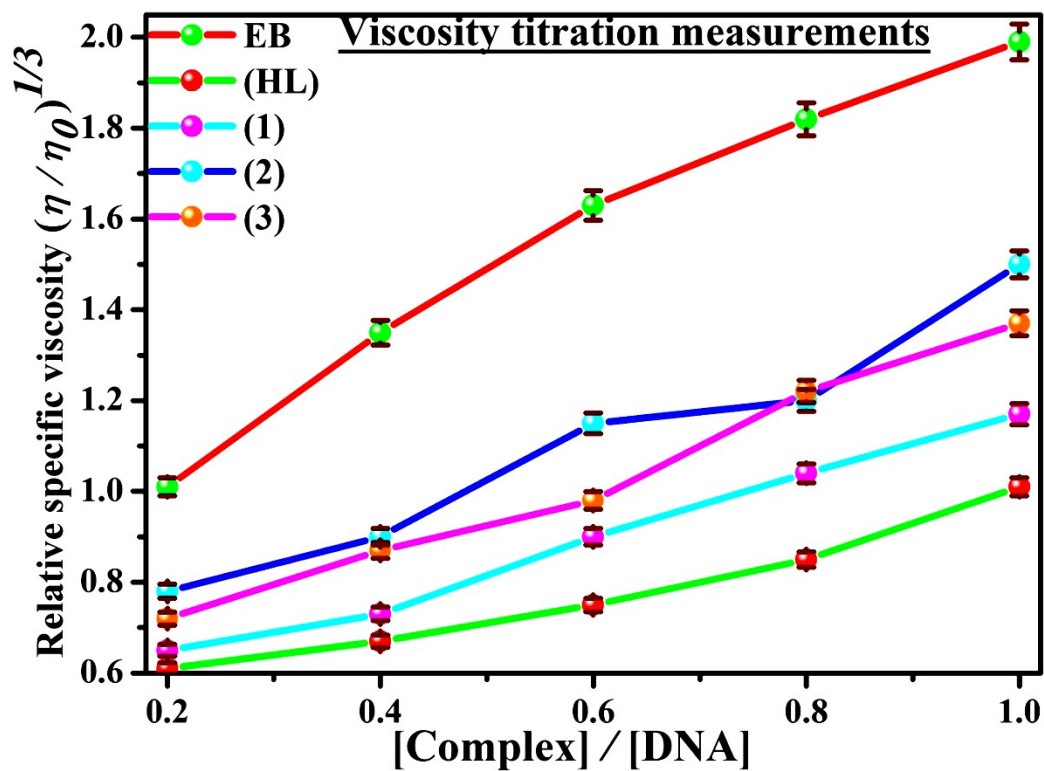

Fig.S21. Relative specific viscosities of CT-DNA in the presence of increasing amounts of ligand (HL), mixed ligand complexes (1–3) and Ethidium bromide (EB) at 25 °C in 5mM Tris-HCl buffer pH = 7.2 and Error limit  $\pm 2.0$  %.

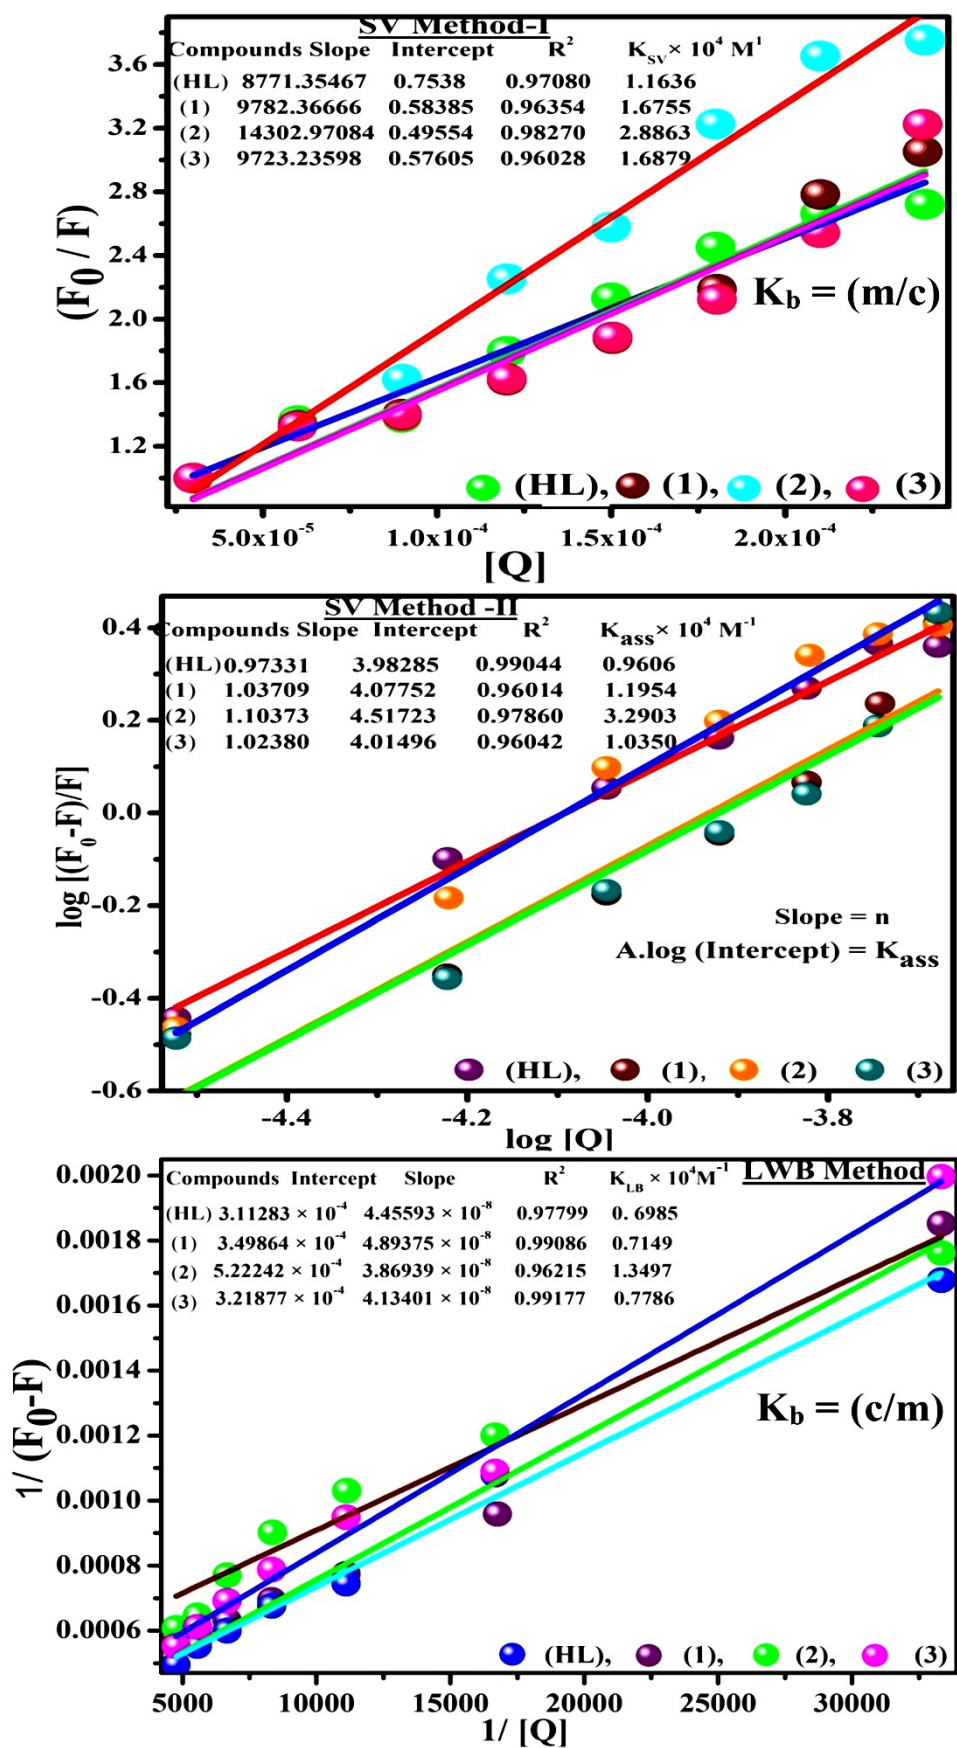

**Fig.S22.** Stern-Volmer linear plots of  $F_0/F$  vs  $[Q]$  (Method I),  $\log [(F_0-F)/F]$  vs  $\log [Q]$  (SV Method-II) and Lineweaver-Burk linear plot of  $1/(F_0-F)$  vs  $1/[Q]$  for the quenching of fluorescence of ethidium bromide (EB)-DNA complex caused by ligand (HL) and mixed ligand complexes (1–3).

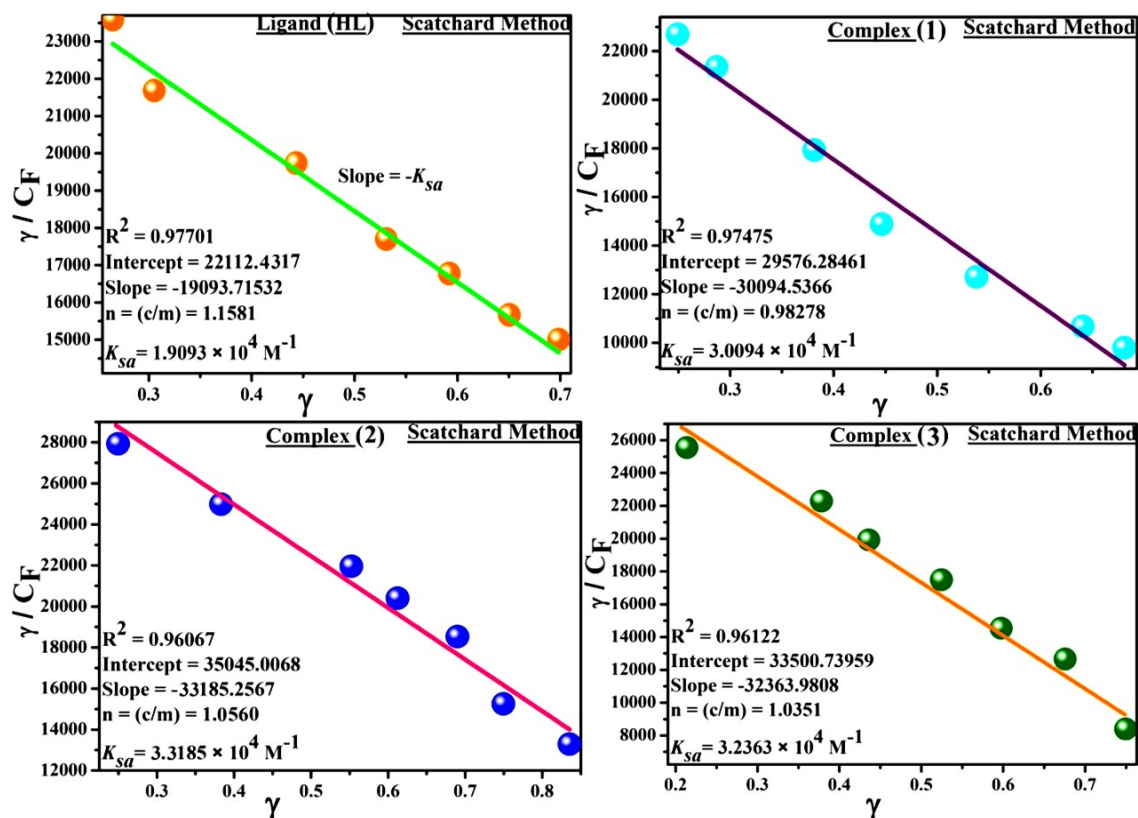

**Fig.S23.** Determining association binding constant and number of binding sites for ligand (HL) and complexes (1–3) – DNA by Scatchard linear plot of ( $\gamma / C_F$ ) vs  $\gamma$ .

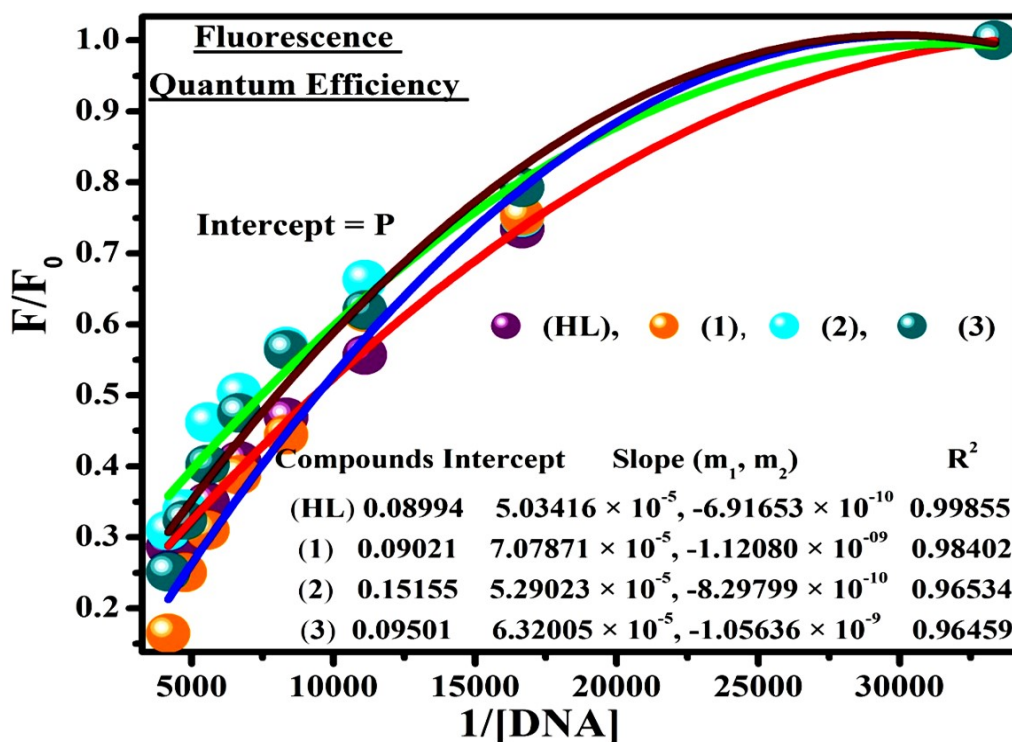

Fig.S24. Determination of ratio of the fluorescence quantum efficiency (P) of DNA bound and free complex ( $P = \phi_b/\phi_f$ ) for ligand (HL) and complexes (1–3) from Stern-Volmer linear plots  $F/F_0$  vs  $1/[DNA]$ .

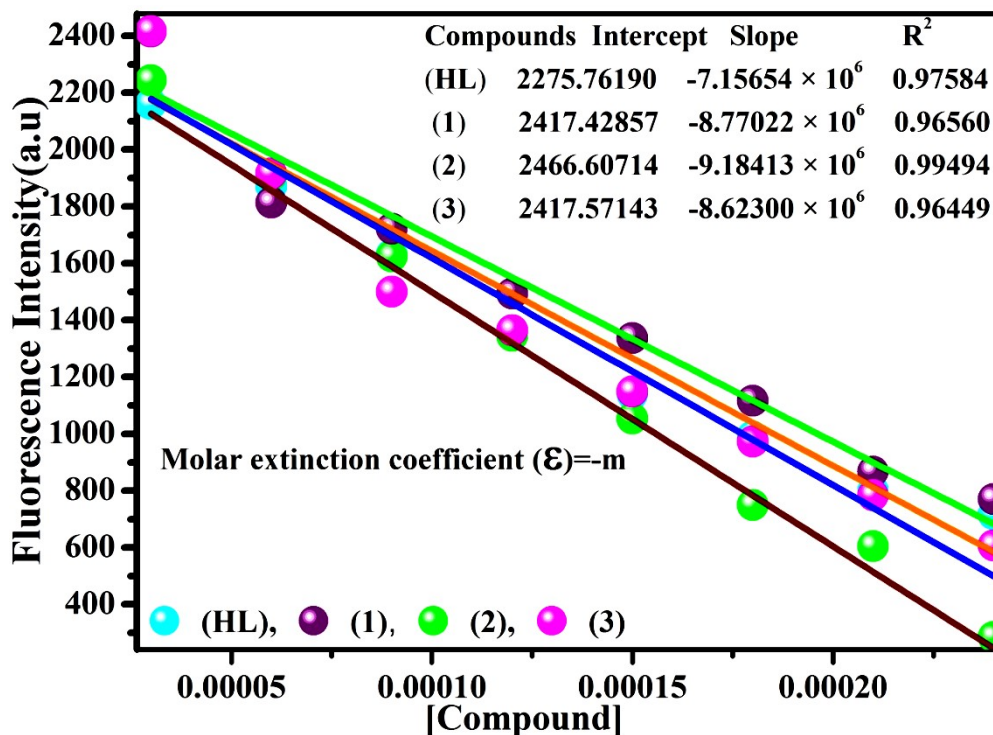

Fig.S25. Determination of apparent binding constant ( $K_{app}$ ) from the linear plot of fluorescence intensity vs concentration of compounds.

$$K_{app} = K_{EB} \left\{ \frac{[EB]}{[compound]} \right\}$$
 Where,  $K_{EB} = 10^7 \text{ M}^{-1}$  at the concentration of 50  $\mu\text{M}$  EB.  $IC_{50}$  value of complex concentration was measured at a 50 % reduction of the fluorescence intensity of EB.



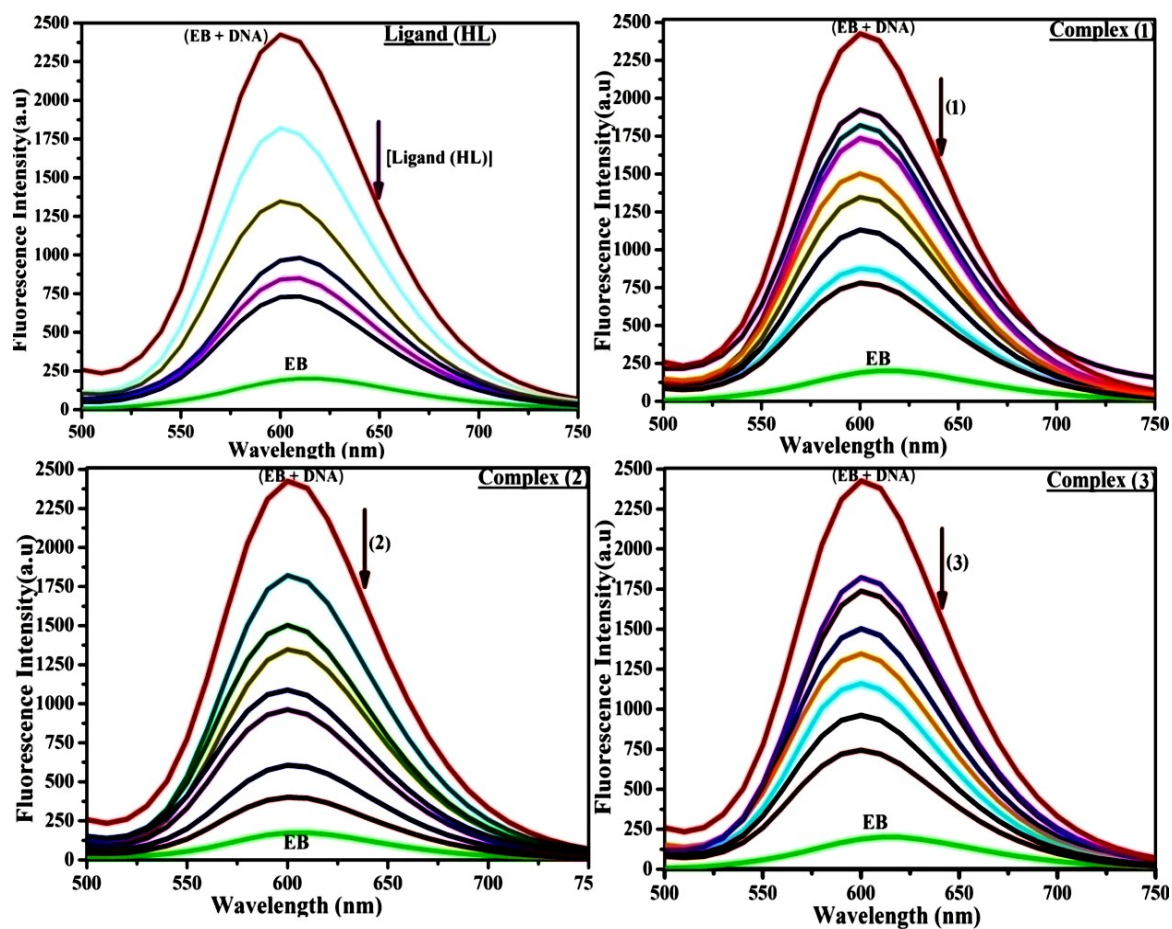

Fig. S26. Fluorescence quenching curve of EB bound DNA in the presence of ligand (HL) and complexes (1–3).

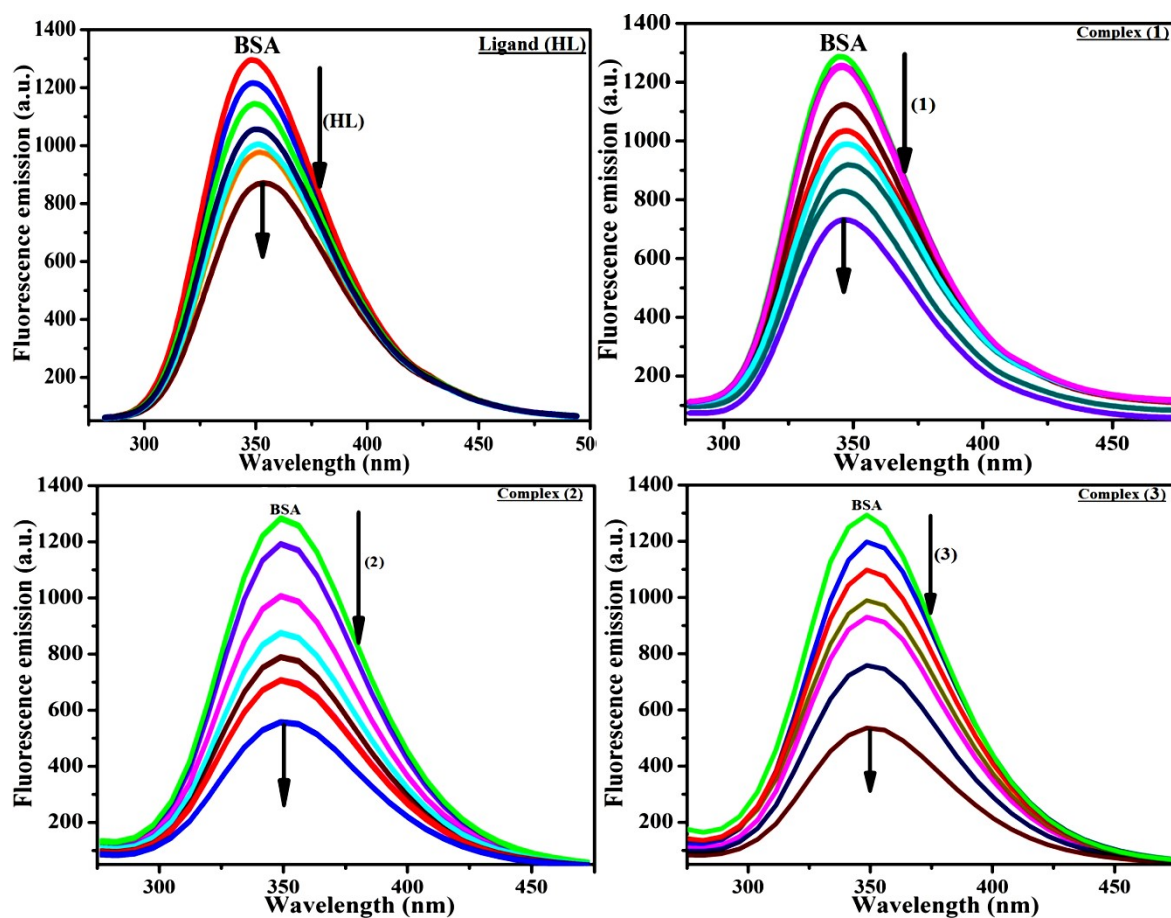

Fig. S27. Fluorescence quenching spectra of BSA in presence of various concentrations of ligand (HL) and complex (1–3).

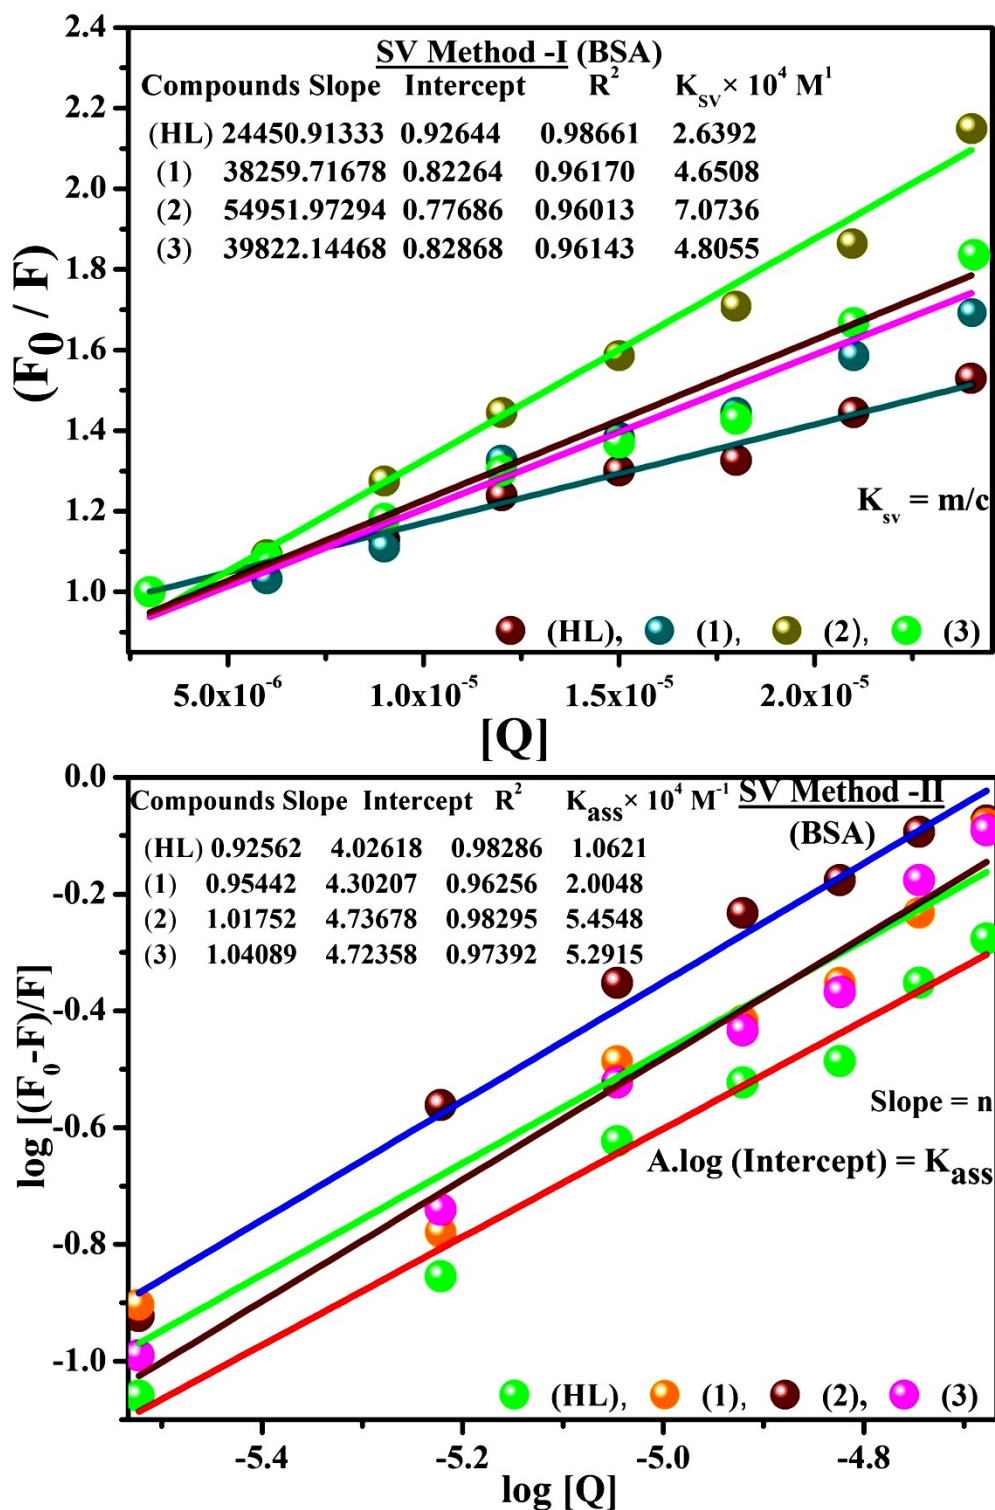

**Fig.S28.** Stern-Volmer linear plots of  $F_0 / F$  vs  $[Q]$  (Method I), and  $\log [(F_0 - F) / F]$  vs  $\log [Q]$  (SV Method II) for the fluorescence quenching of BSA by free ligand (HL) and complexes (1–3).

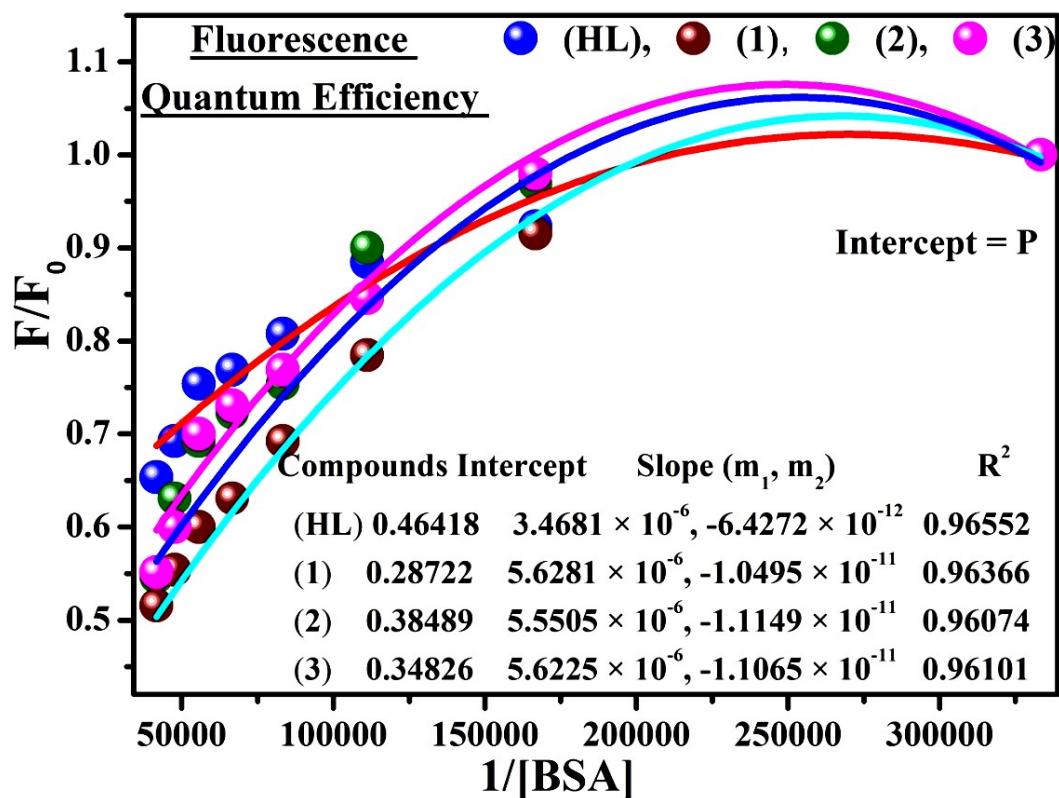

**Fig.S29.** Determination of ratio of the fluorescence quantum efficiency ( $P$ ) of BSA bound and free complex ( $P = \phi_b / \phi_f$ ) for ligand (HL) and mixed ligand complexes (1–3) from Stern-Volmer linear plots  $F/F_0$  vs  $1/[BSA]$ .

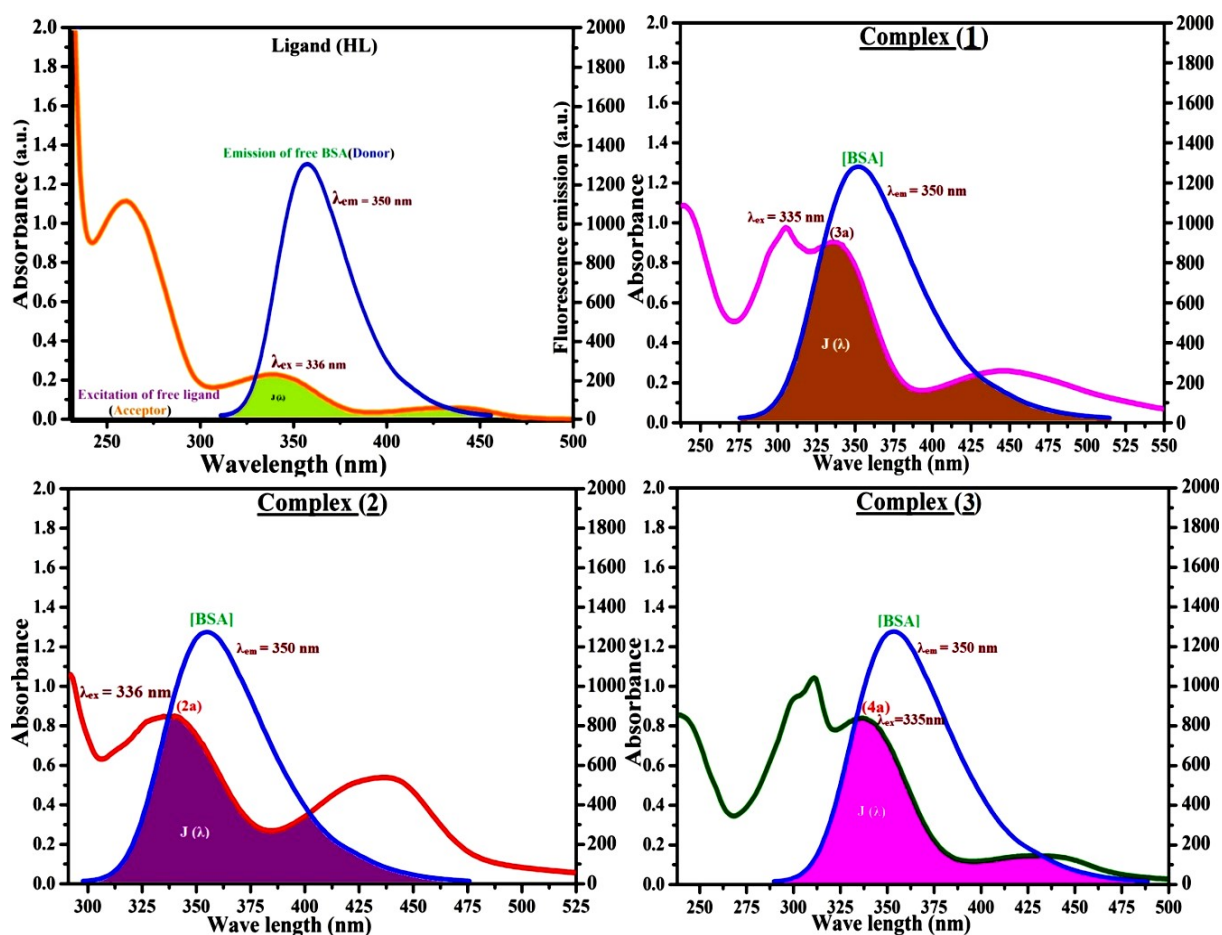

**Fig.S30.** The overlap of UV-Vis spectra of ligand (HL) & mixed ligand complexes (1-3) (Acceptor) at 335 – 336 nm with fluorescence emission spectrum of BSA (Donor) at 350 nm.

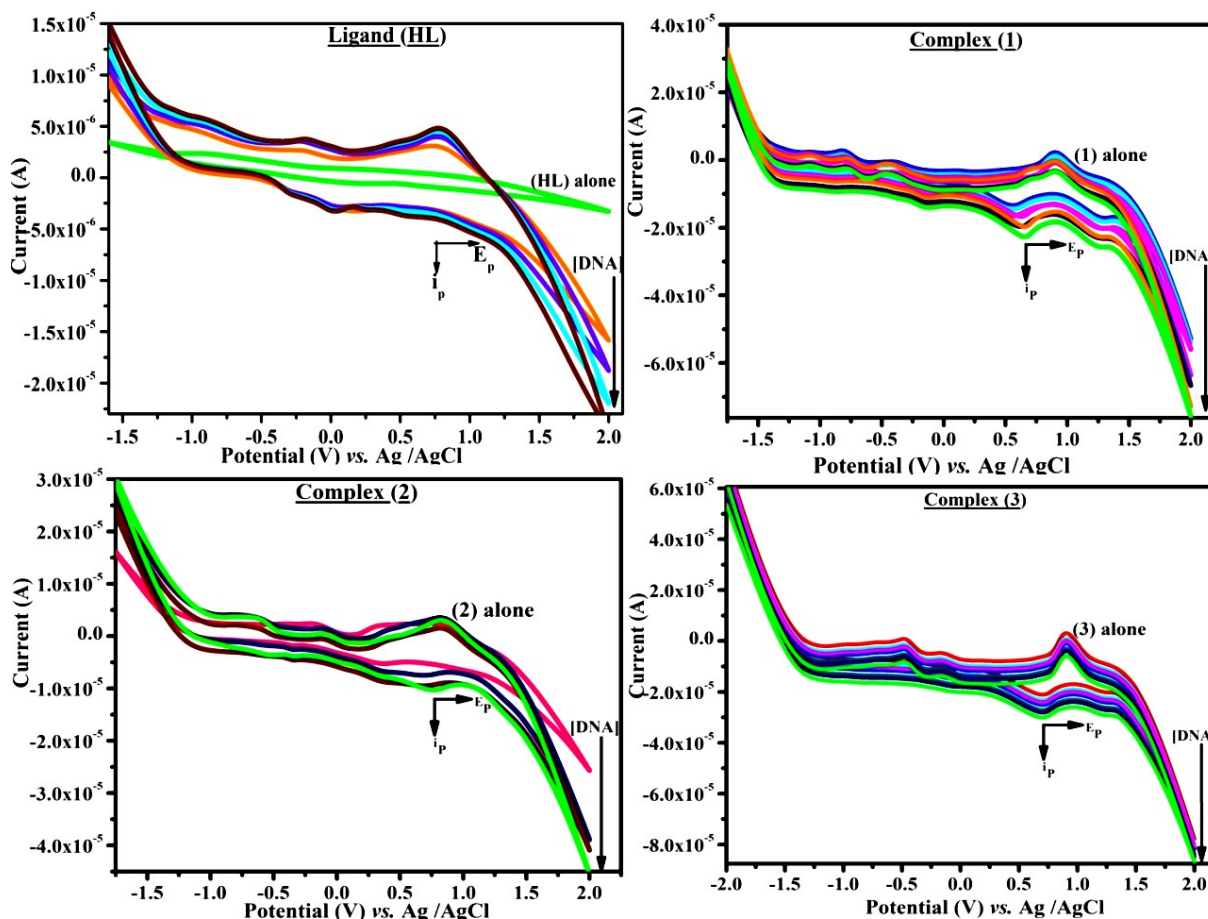

**Fig.S31.** Cyclic voltammograms of ligand (HL) and its ligand complexes (1–3) in 0.05 M Tris-HCl buffer (Supporting electrolyte) pH = 7.2 at 25 °C in presence of increasing concentration of DNA (10 – 50  $\mu$ M) and arrow indicates the changes in peak current and potentials at scan rate 100 mvs<sup>-1</sup>.

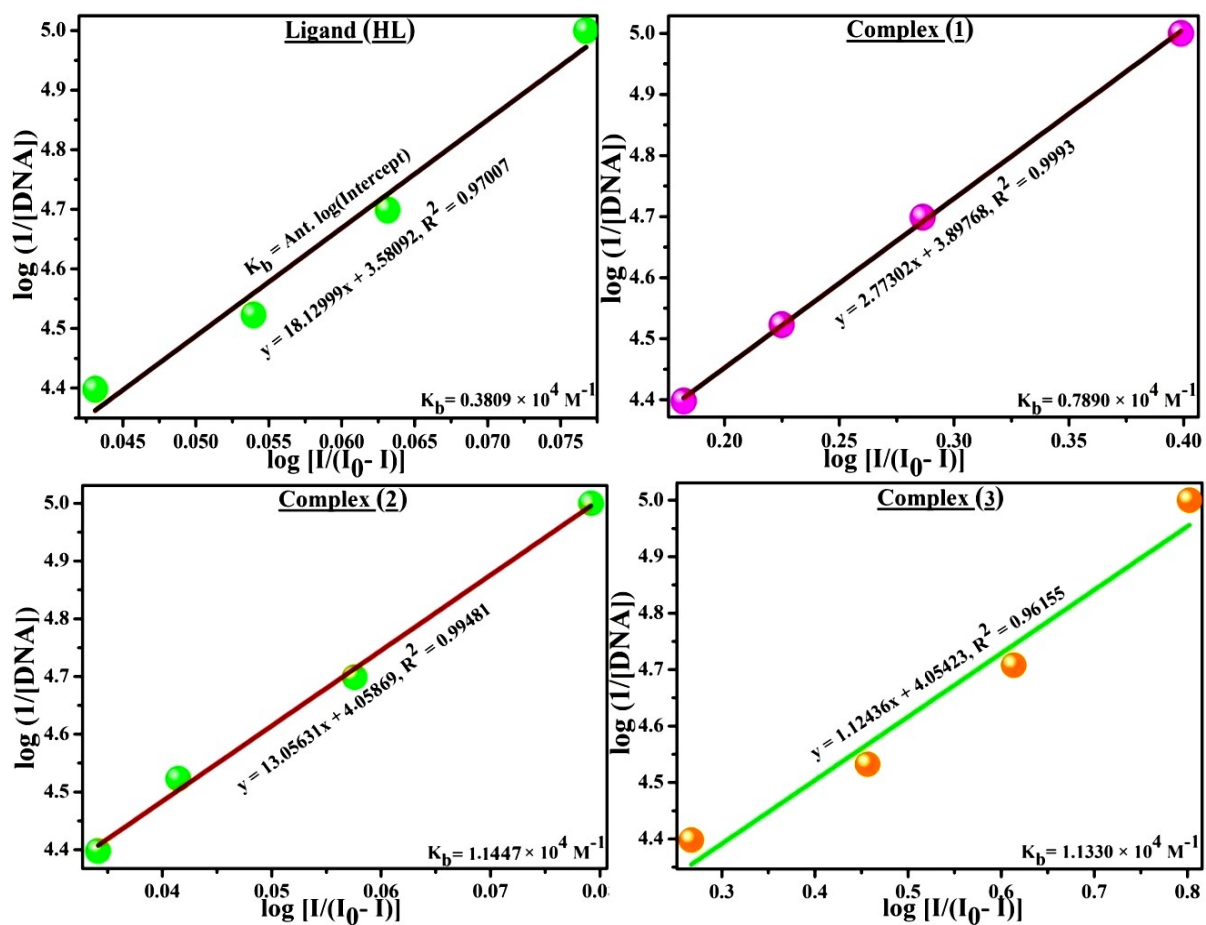

Fig.S32. Plot of  $\log(1/[DNA])$  vs  $\log(I/(I_0-I))$  to evaluate the binding constants for ligand (HL) and ligand complexes (1–3) with DNA by Method I.

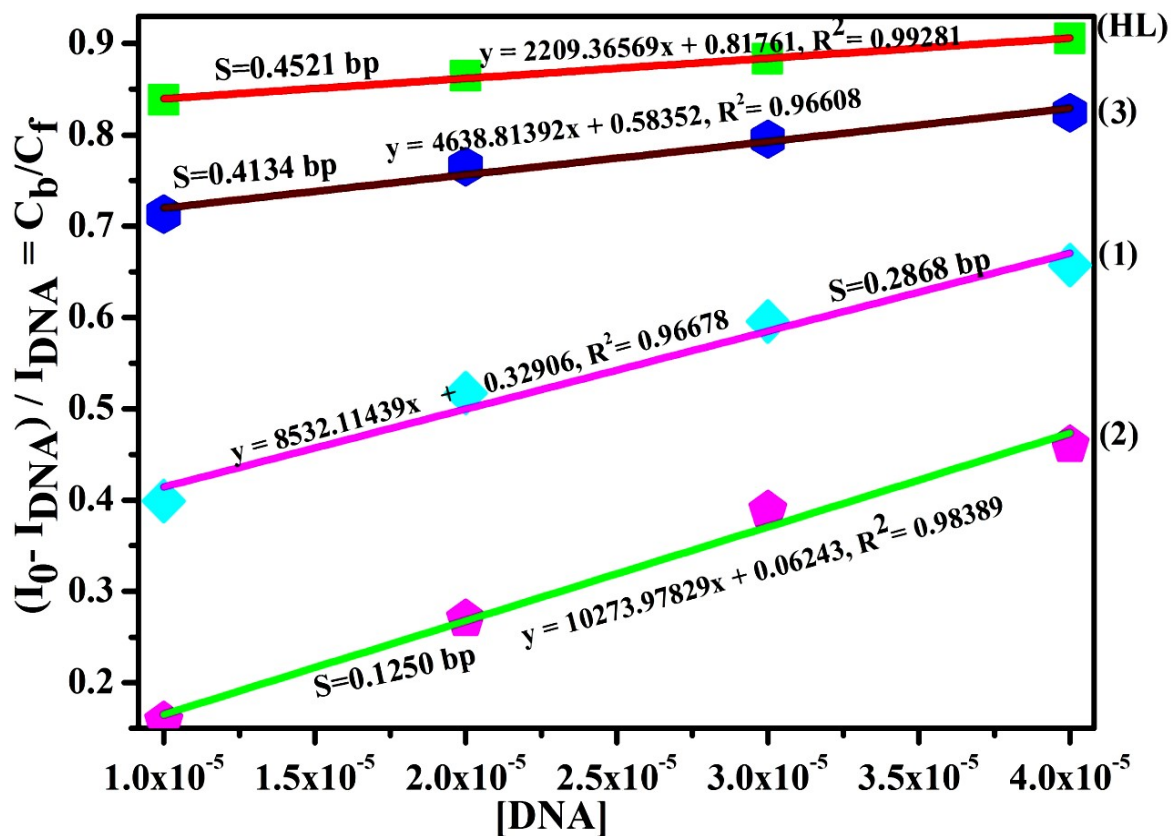

Fig.S33. Plot of  $C_b/C_f$  vs  $[DNA]$  for determination of binding site size (S) and binding constant for ligand (HL) and mixed ligand complexes (1–3) with DNA by Method II.



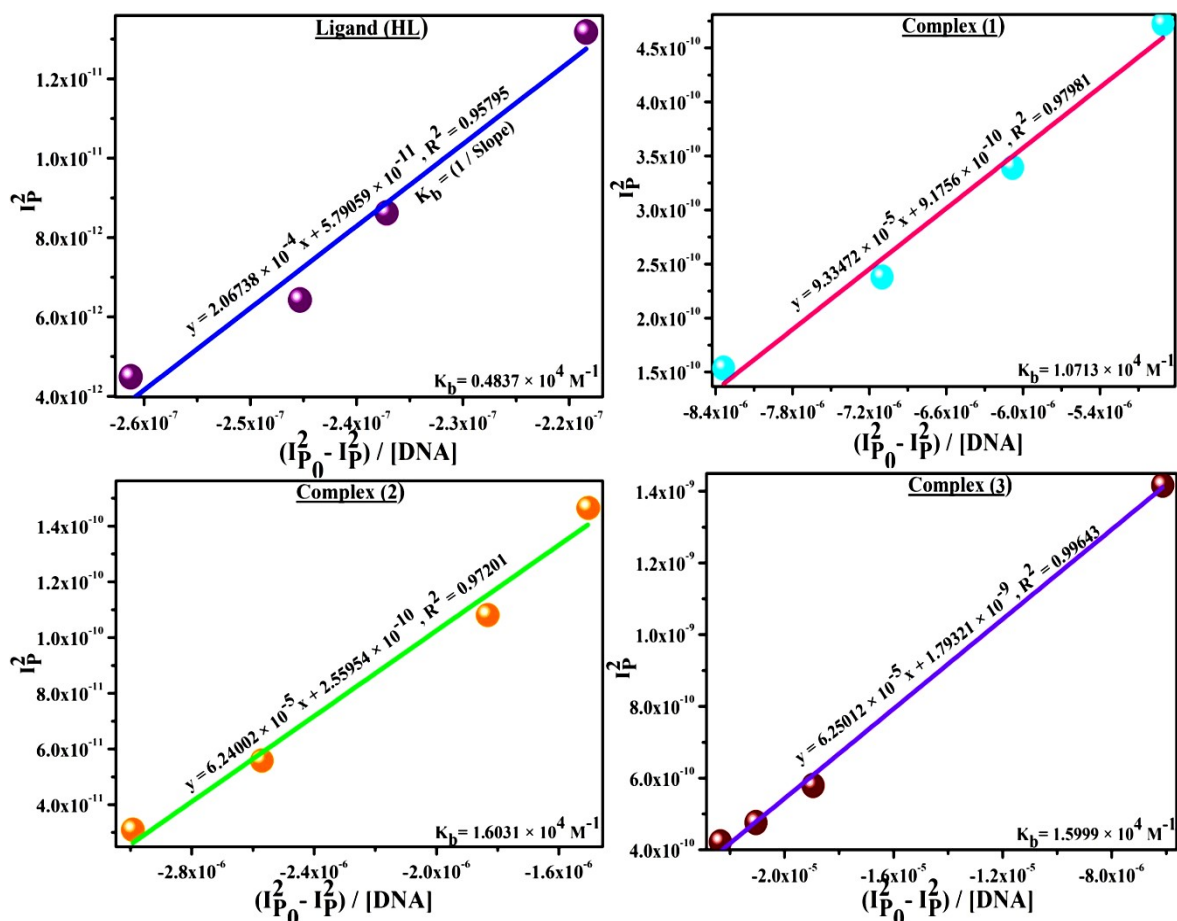

**Fig.S34.** Plot of  $I_p^2$  vs  $(I_{p0}^2 - I_p^2) / [DNA]$  to evaluate the binding constants for ligand (HL) and complexes (1–3) with DNA by Method III.

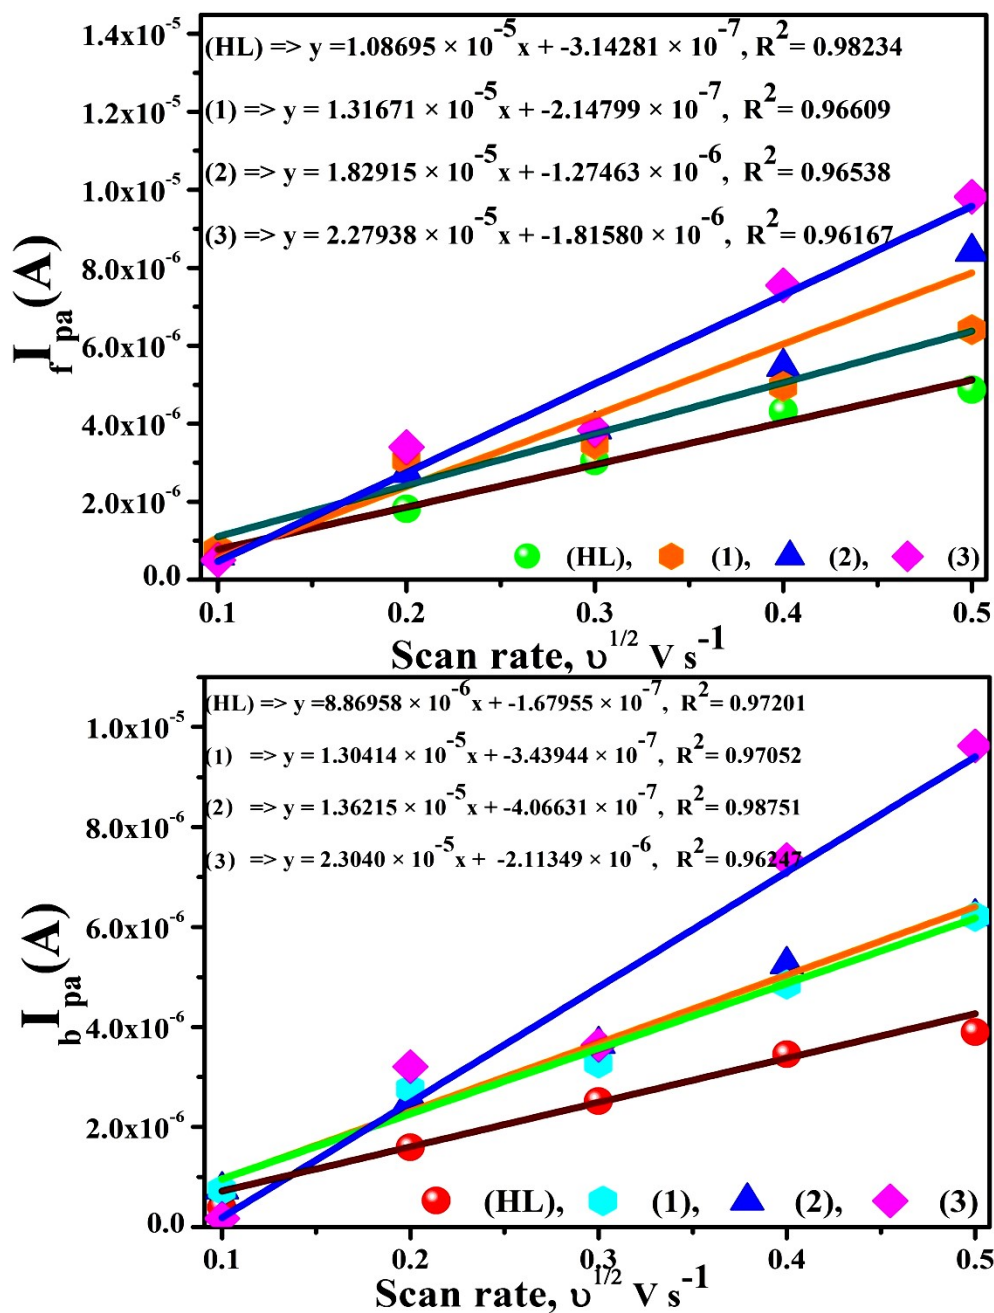

**Fig.S35.** Plots of  $I_{pa}$  vs.  $v^{1/2}$  and  $I_{pa}$  vs.  $v^{1/2}$  for the determination of diffusion coefficients ( $D_0$ ) of the free compounds in the absence and presence of DNA at scan rates 0.01–0.3 V/s.

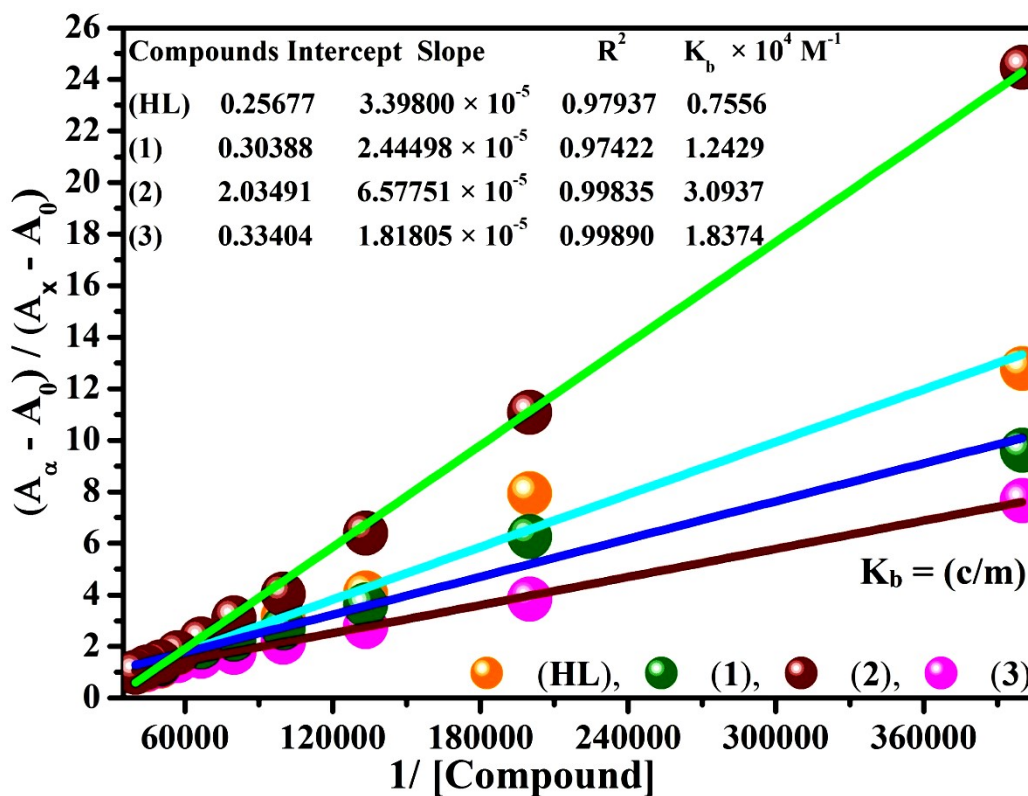

**Fig.S36.** Benesi-Hildebrand linear plot  $[(A_\infty - A_0) / (A_x - A_0)]$  vs  $1 / [\text{compound}]$  determining binding constant for ligand (HL) and mixed ligand complexes (1–3) – BSA at 298 K.

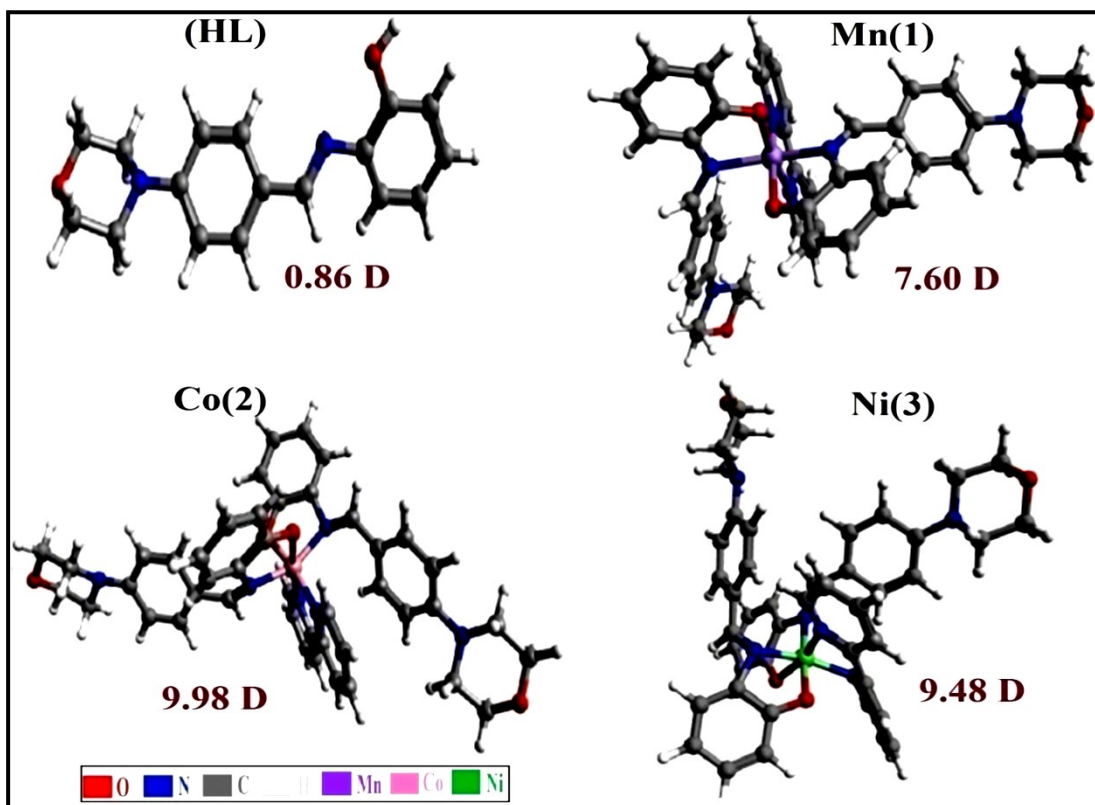

Fig.S37. The optimized geometries for the free ligand (HL) and its mixed ligand complexes (1-3).

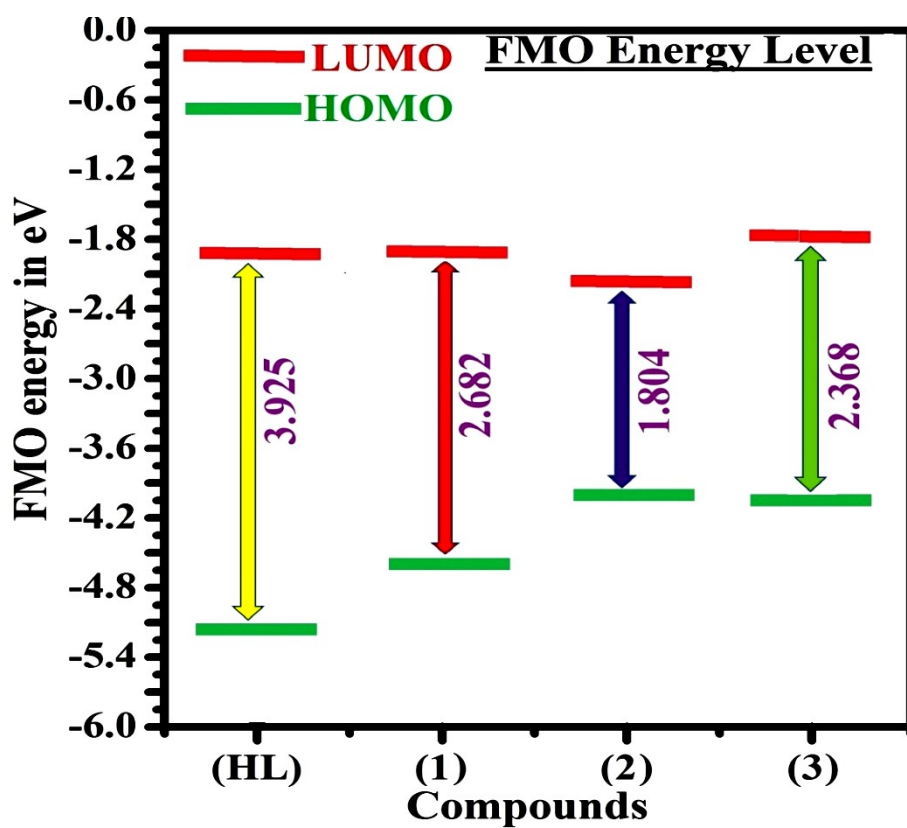

Fig.S38. FMO energy level diagram by DFT computation for all compounds.

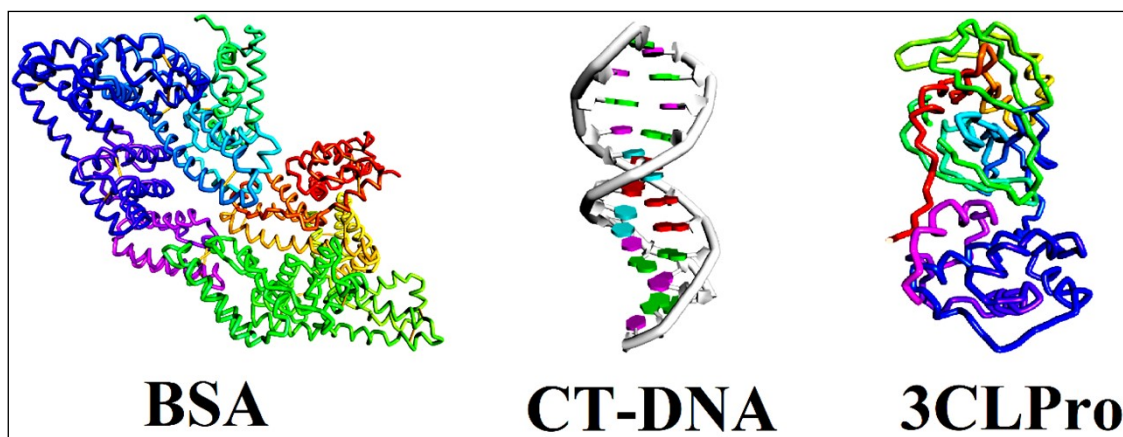

**Fig.S39.** 3D model of the host biomolecules used for docking calculations. From left to right: BSA, CT-DNA and 3CLPro.

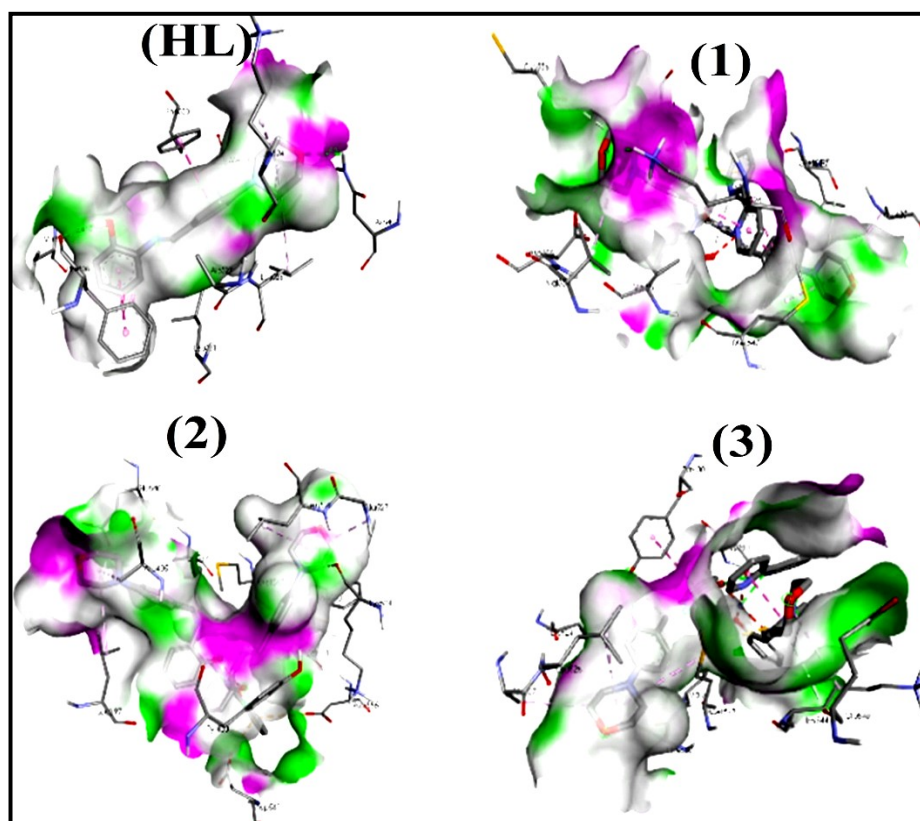

**Fig.S40.** Noncovalent interactions in the active site of the BSA protein. The pink and green colors denote H-bond acceptor and donor sites respectively.

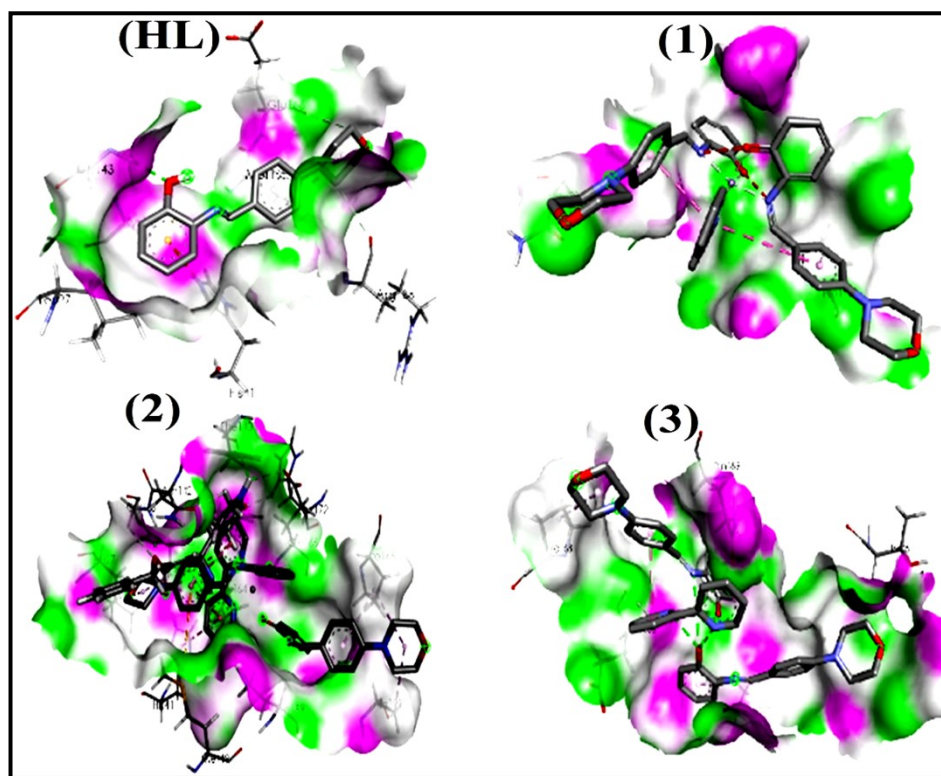

**Fig.S41.** Noncovalent interactions in the active site of the 3CLPro protein. The pink and green colors denote H-bond acceptor and donor sites respectively.

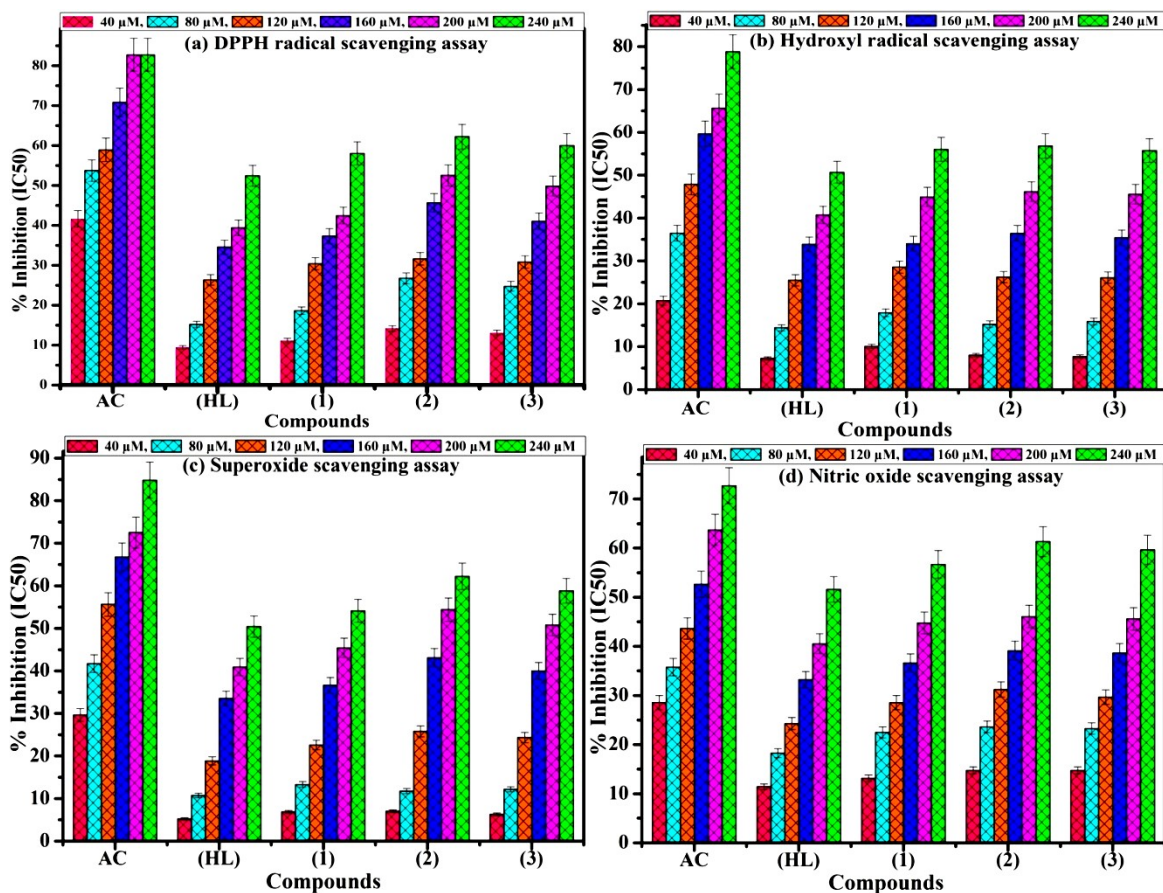

**Fig.S42 (a–d).** % inhibition-IC<sub>50</sub> of of (a) DPPH, (b) Hydroxyl, (c) Superoxide and (d) Nitric oxide scavenging assay for ligand (HL), mixed ligand complexes (1–3) and standard ascorbic acid (AC-control at various concentration (40, 80,120,160, 200, 240

μM).  

$$Scavenging (\%) = \left[ \frac{(A_0 - A_s)}{A_0} \right] \times 100 \quad (43);$$
 where  $A_0$  and  $A_s$  are denoted as the absorbance intensity of free DPPH (control) and DPPH mixed substances in ethanol, respectively. Error limits  $\pm 2.5 - 5.0 \%$  ( $P \leq 0.05$ ).

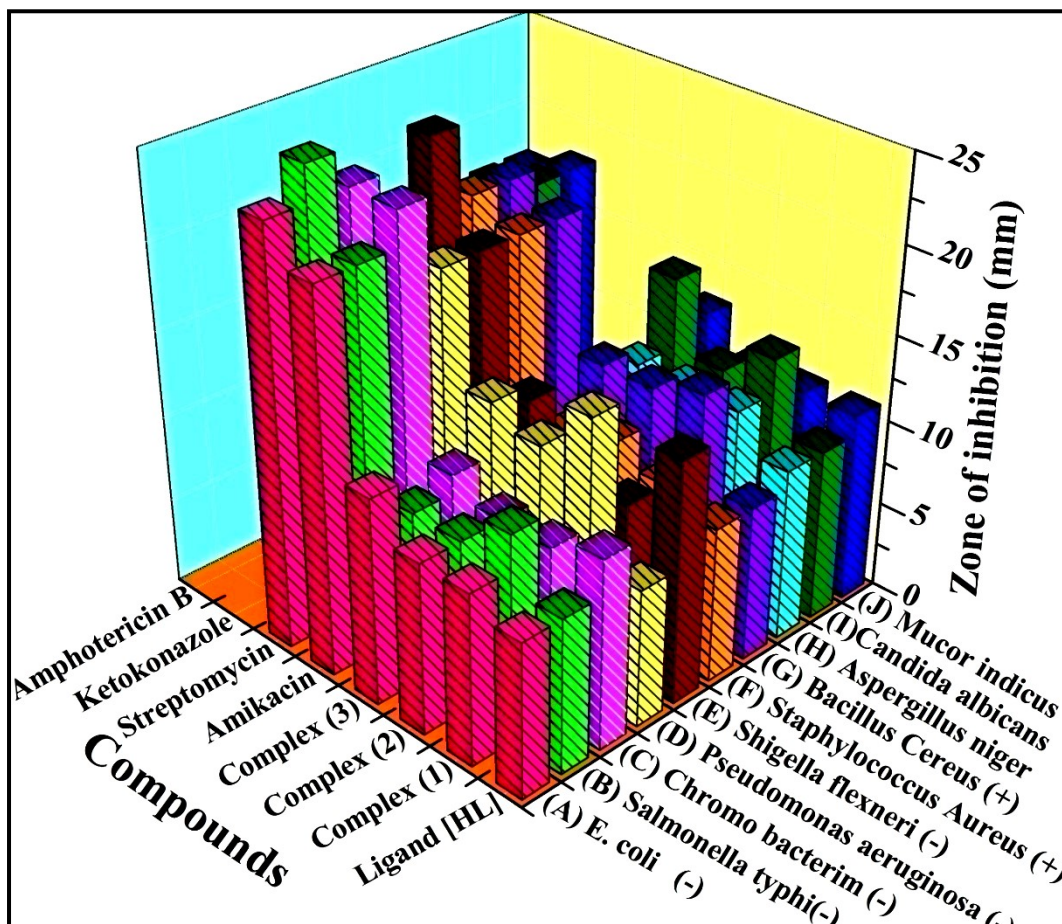

Fig.S43. Agar disc diffusion technique histogram comparing the antimicrobial effects for all substances. Error limits  $\pm 2.5 - 5.0 \%$  ( $P \leq 0.05$ ).



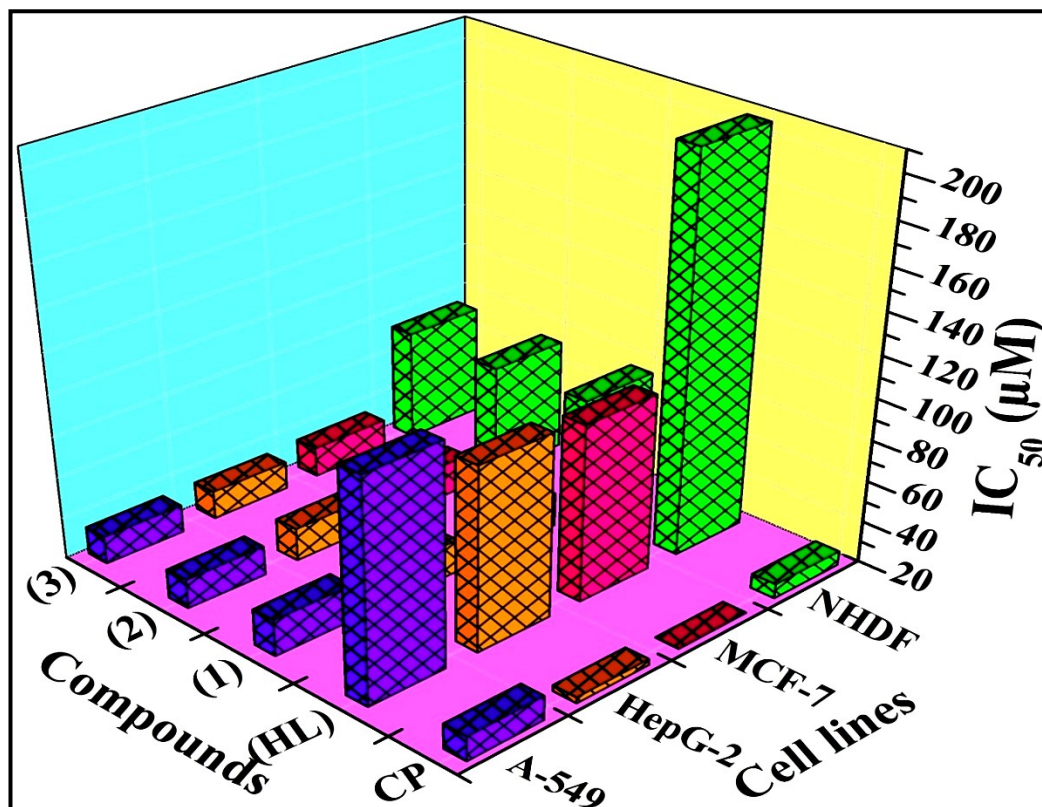

**Fig.S44.** The evaluation of the cytotoxic properties ( $IC_{50}$ ,  $\mu M$ ) of ligand (HL) and its complexes (1–3) against cancer and normal cell lines in comparison to the standard medication cisplatin (CP). Error limits  $\pm 2.5 - 5.0 \%$  ( $P \leq 0.05$ ).

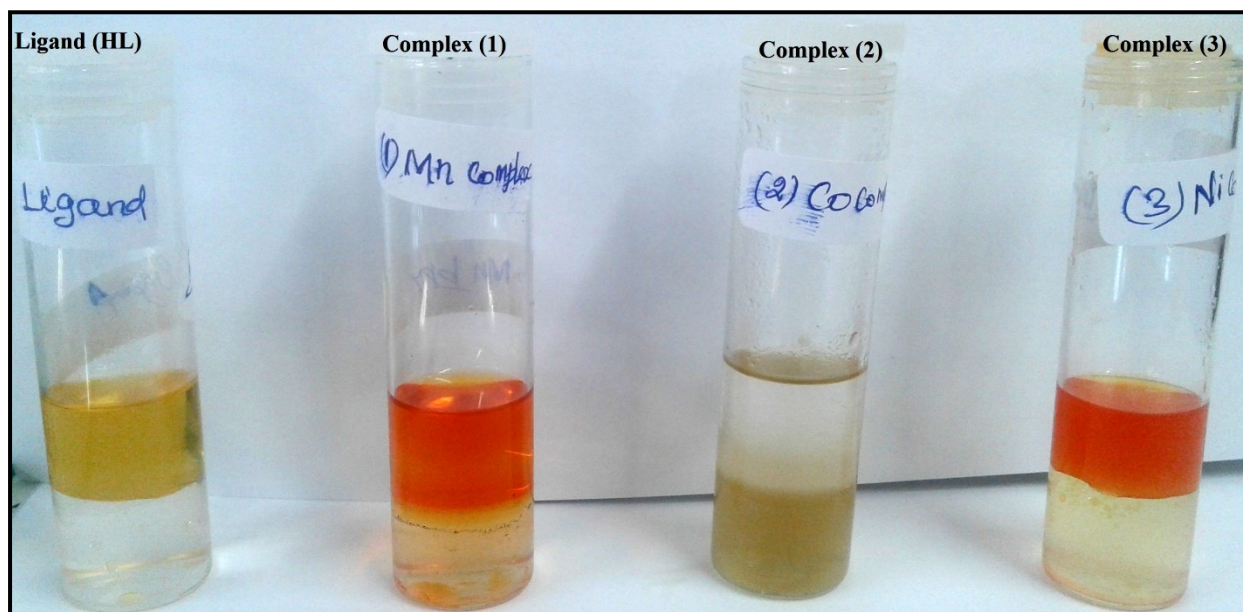

Fig.S45. n-octanol/deionized water phase of complexes (1–3) and free ligand (HL) for determination of partition coefficient ( $\log P_{o/w}$ ) by shake flask method.

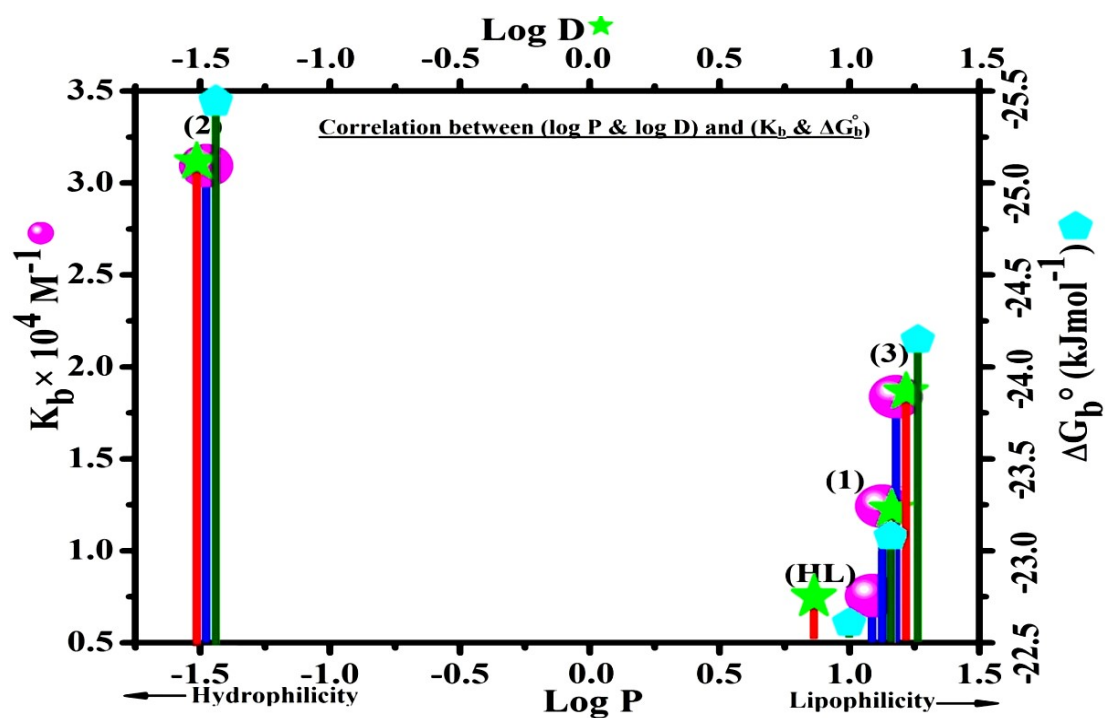

Fig.S46. The correlation plot between partition coefficient ( $\log P$ ) & distribution coefficient ( $\log D$ ) vs BSA binding constants ( $K_b$ ) & Gibbs's free energy Change ( $\Delta G_b^0$ ) for complexes (1–3) and free ligand (HL).

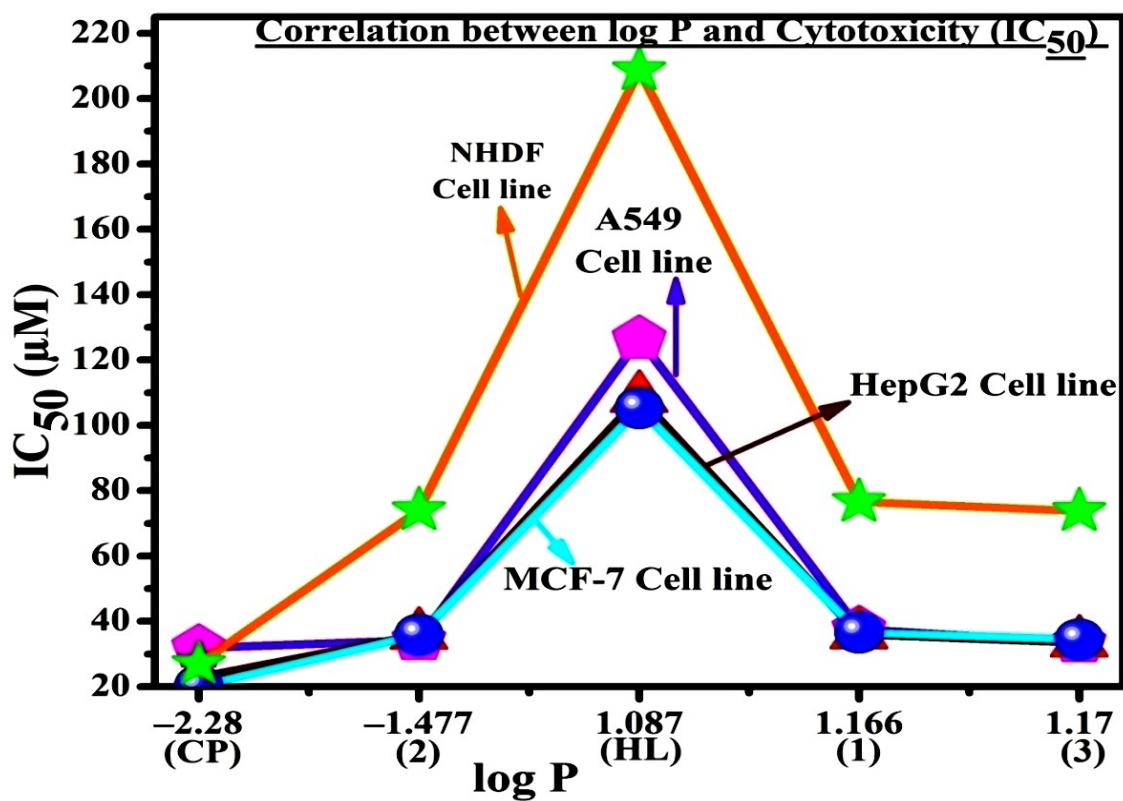

Fig.S47. Cytotoxicity ( $IC_{50}$ ,  $\mu M$ ) of ligand (HL) and its complexes (1–3) as a function of their partition coefficient ( $\log P$ ) comparison with standard anticancer drug cisplatin (CP).

## Supplementary Tables

**Table S12** IC<sub>50</sub> values of DPPH radical scavenging assay at 517 nm.

| Compounds     | % Inhibition (IC <sub>50</sub> ) |       |        |        |        |        |
|---------------|----------------------------------|-------|--------|--------|--------|--------|
|               | 40 μM                            | 80 μM | 120 μM | 160 μM | 200 μM | 240 μM |
| Ascorbic acid | 41.63                            | 53.74 | 58.95  | 70.86  | 82.75  | 85.65  |
| (HL)          | 09.45                            | 15.21 | 26.36  | 34.56  | 39.41  | 52.45  |
| (1)           | 11.16                            | 18.62 | 30.41  | 37.32  | 42.47  | 58.05  |
| (2)           | 14.20                            | 26.76 | 31.64  | 45.67  | 52.54  | 62.23  |
| (3)           | 13.08                            | 24.74 | 30.86  | 41.06  | 49.83  | 60.02  |

$Scavenging\ (%) = \left[ \frac{(A_0 - A_s)}{A_0} \right] \times 100$ , Where, A<sub>0</sub> → absorbance of the control or (DPPH alone in ethanol) and A<sub>s</sub> → absorbance of the sample or (Mixture of DPPH and compounds in ethanol). Error limits ± 2.5 - 5.0.

**Table S13** IC<sub>50</sub> values of Hydroxyl radical scavenging assay at 230 nm.

| Compounds     | % Inhibition (IC <sub>50</sub> ) |       |        |        |        |        |
|---------------|----------------------------------|-------|--------|--------|--------|--------|
|               | 40 μM                            | 80 μM | 120 μM | 160 μM | 200 μM | 240 μM |
| Ascorbic acid | 20.73                            | 36.46 | 47.87  | 59.65  | 65.64  | 78.83  |
| (HL)          | 07.26                            | 14.43 | 25.52  | 33.86  | 40.73  | 50.68  |
| (1)           | 10.08                            | 17.89 | 28.56  | 34.04  | 44.92  | 56.03  |
| (2)           | 08.02                            | 15.24 | 26.23  | 36.41  | 46.17  | 56.85  |
| (3)           | 07.67                            | 15.86 | 26.12  | 35.43  | 45.56  | 55.75  |

**Table S14** IC<sub>50</sub> values of Superoxide scavenging assay at 590 nm.

| Compounds     | % Inhibition (IC <sub>50</sub> ) |            |             |             |             |             |
|---------------|----------------------------------|------------|-------------|-------------|-------------|-------------|
|               | 40 $\mu$ M                       | 80 $\mu$ M | 120 $\mu$ M | 160 $\mu$ M | 200 $\mu$ M | 240 $\mu$ M |
| Ascorbic acid | 29.64                            | 41.72      | 55.63       | 66.75       | 72.55       | 84.85       |
| (HL)          | 05.23                            | 10.74      | 18.85       | 33.55       | 40.91       | 50.42       |
| (1)           | 06.85                            | 13.32      | 22.56       | 36.63       | 45.42       | 54.12       |
| (2)           | 07.02                            | 11.73      | 25.81       | 43.12       | 54.42       | 62.24       |
| (3)           | 06.27                            | 12.17      | 24.31       | 40.01       | 50.78       | 58.83       |

**Table S15** IC<sub>50</sub> values of Nitric oxide scavenging assay at 546 nm.

| Compounds     | % Inhibition (IC <sub>50</sub> ) |            |             |             |             |             |
|---------------|----------------------------------|------------|-------------|-------------|-------------|-------------|
|               | 40 $\mu$ M                       | 80 $\mu$ M | 120 $\mu$ M | 160 $\mu$ M | 200 $\mu$ M | 240 $\mu$ M |
| Ascorbic acid | 28.55                            | 35.75      | 43.65       | 52.68       | 63.72       | 72.73       |
| (HL)          | 11.42                            | 18.26      | 24.28       | 33.21       | 40.53       | 51.62       |
| (1)           | 13.14                            | 22.48      | 28.54       | 36.64       | 44.75       | 56.69       |
| (2)           | 14.72                            | 23.62      | 31.21       | 39.12       | 46.06       | 61.34       |
| (3)           | 14.72                            | 23.28      | 29.66       | 38.63       | 45.60       | 59.65       |
